1 **Title:**

2 **Multi-omics analysis of chromatin accessibility and interactions with transcriptome by HiCAR**

3

4 **Author list:**

5 Xiaolin Wei<sup>1,2\*</sup>, Yu Xiang<sup>1,2\*</sup>, Ruocheng Shan<sup>3</sup>, Derek T. Peters<sup>1,2</sup>, Tongyu Sun<sup>1,2</sup>, Xin Lin<sup>1,2</sup>, Wei Li<sup>3</sup>, Yarui

6 Diao<sup>1,2,4,#</sup>

7

8 **Affiliation:**

9 1. Department of Cell Biology, Duke University Medical Center, Durham, NC 27708

10 2. Regeneration Next Initiative, Duke University Medical Center, Durham, NC 27708

11 3. Center for Genetic Medicine Research, Center for Cancer and Immunology Research at Children's  
12 National Medical Center, Washington, D.C., 20010

13 4. Department of Orthopedic Surgery, Duke University Medical Center, Durham, NC 27708

14

15 \* These authors contributed equally to this work.

16 # Corresponding author: [yarui.diao@duke.edu](mailto:yarui.diao@duke.edu)

17 **Abstract:**

18 The long-range interactions of *cis*-regulatory elements (cREs) play a central role in regulating the spatial-  
19 temporal gene expression program of multi-cellular organism. cREs are characterized by the presence  
20 of accessible (or “open) chromatin, which can be identified at genome-wide scale with assays such as  
21 ATAC-seq, DHS-seq, and FAIRE-seq. However, it remains technically challenging to comprehensively  
22 identify the long-range physical interactions that occur between cREs, especially in a cost effective  
23 manner using low-input samples. Here, we report HiCAR (**H**igh-throughput **C**hromosome conformation  
24 capture on **A**ccessible DNA with **m**RNA-seq co-assay), a method that enables simultaneous assessment  
25 of *cis*-regulatory chromatin interactions and chromatin accessibility, as well as evaluation of the  
26 transcriptome, which represents the functional output of chromatin structure and accessibility. Unlike  
27 immunoprecipitation-based methods such as HiChIP, PLAC-seq, and ChIA-PET, HiCAR does not require  
28 target-specific antibodies and thus can comprehensively capture the *cis*-regulatory chromatin contacts  
29 anchored at accessible regulatory DNA regions and associated with diverse epigenetic modifications and  
30 transcription factor binding. Compared to Trac-looping, another method designed to capture interactions  
31 between accessible chromatin regions, HiCAR produced a 17-fold greater yield of informative long-range  
32 *cis*- reads at a similar sequencing depth and required 1,000-fold fewer cells as input. Applying HiCAR to  
33 H1 human embryonic stem cells (hESCs) revealed 46,792 *cis*-regulatory chromatin interactions at 5kb  
34 resolution. Interestingly, we found that epigenetically poised, bivalent, and repressed cREs exhibit  
35 comparable spatial interaction activity to those transcriptionally activated cREs. Using machine learning  
36 approaches, we predicated 22 epigenome features that are potentially important for the spatial interaction  
37 activity of cREs in H1 hESC. Lastly, we also identified long-range *cis*-regulatory chromatin interactions in  
38 GM12878 and mouse embryonic stem cells with HiCAR. Our results demonstrate that HiCAR is a robust  
39 and cost-effective multi-omics assay, which is broadly applicable for simultaneous analysis of genome  
40 architecture, chromatin accessibility, and the transcriptome using low-input samples.

41 **Main Text:**

42 **Introduction**

43 *Cis*-regulatory elements (cREs), such as enhancers, promoters, insulators and silencers, play a  
44 critical role in regulating spatial-temporal gene expression in development and diseases<sup>1-3</sup>. CREs are  
45 characterized by the presence of “open” or accessible chromatin that is depleted of packaging  
46 nucleosome particles, making way for the binding of Transcription Factors (TFs) and a variety of  
47 epigenetic remodelers. These accessible chromatin regions can be identified by Assay for Transposase-  
48 Accessible Chromatin using sequencing (ATAC-Seq)<sup>4</sup>, DNase-Seq<sup>5</sup>, and FAIRE-Seq<sup>6</sup> (Formaldehyde-  
49 Assisted Isolation of Regulatory Elements). cREs can form dynamic high-order chromatin interactions to  
50 precisely control the expression of distal target genes. The development of chromosome conformation  
51 capture (3C)-based technologies has greatly improved our understanding of the principles of high-order  
52 chromatin organization, and revealed how dynamic chromatin looping affects gene expression in a cell  
53 type specific manner. Among these technologies, Hi-C has been widely used to measure genome-wide  
54 chromatin architecture<sup>7,8</sup>, but requires extremely deep sequencing depth (several billion reads) to resolve  
55 chromatin interactions at 5- to 10-kilobase resolution. To reduce the sequencing costs, alternative  
56 methods such as ChIA-PET, HiChIP, PLAC-seq and Capture-C have been developed<sup>9-14</sup>. However,  
57 these methods rely on ChIP-grade antibody (ChIA-PET, HiChIP and PLAC-seq) or pre-designed capture  
58 probes (Capture-C) to enrich a subset of chromatin interactions associated with specific proteins, histone  
59 modifications, or targeted genome regions. More recently, Trac-looping and Ocean-C have been  
60 developed to analyze interactions among accessible chromatin regions, independent of ChIP antibodies  
61 or capture probes<sup>15,16</sup>. Although these two methods do not require targeted immunoprecipitation or DNA  
62 pulldown, they require a large number of cells and yield a relatively low proportion of long-range *cis*  
63 reads, preventing their application to low input materials, such as clinical samples and primary tissues.  
64 Moreover, none of the methods described above enable simultaneous assessment of the transcriptome  
65 from the same biological sample, which is the key functional output of genome architecture and chromatin  
66 accessibility. Therefore, a robust, sensitive, and cost effective method is urgently needed to enable a  
67 comprehensive analysis of chromatin structure and function, including transcription output, using low-  
68 input materials.

69

70 Here, we introduce a new method called HiCAR, which allows genome-wide profiling of long-range  
71 *cis*-regulatory chromatin interactions, chromatin accessibility, and gene expression using the same input  
72 sample. By leveraging principles of *in situ* Hi-C, ATAC-seq, and SMART-seq2 methods, HiCAR requires  
73 only ~100,000 cells as input and avoids many potentially nucleic acid loss-prone steps, such as adaptor

74 ligation and biotin-pull down. With similar sequencing depth, HiCAR outperforms Trac-looping<sup>15</sup> by  
75 generating ~17-fold more (18.3% versus 1.1%) long-range (>20kb) *cis*- paired-end tags (*cis*-PET), even  
76 when starting from 1,000-fold fewer cells ( $1 \times 10^5$  versus  $1 \times 10^8$  million). As a multi-omics co-assay, HiCAR  
77 also yields high-quality chromatin accessibility and transcriptome data from the same low-input starting  
78 material. Applying HiCAR to H1 human embryonic stem cells (hESCs), we generated a comprehensive  
79 map of *cis*-regulatory chromatin contacts at 5kb resolution. Additionally, we provide a user-friendly data  
80 processing pipeline called HiCARTools (<https://github.com/diao-lab/HiCARTools>) for HiCAR data  
81 processing.

82

## 83 **Results:**

### 84 **Principle of HiCAR**

85 As a proof-of-principle, we performed HiCAR on H1 hESCs, because of the rich public genomic  
86 datasets available for this cell line that could be used to benchmark our approach (Table S1, list of public  
87 datasets used in this study)<sup>2,17</sup>. First, ~100,000 cross-linked H1 cells were treated with Tn5 transposase  
88 assembled with an engineered DNA adaptor (Table S2). The Tn5 adaptor contains a Mosaic End (ME)  
89 sequence for Tn5 recognition<sup>18</sup> as well as a single-stranded flanking sequence that can be ligated to the  
90 CviQI-digested DNA fragment with a splint oligo (Fig 1A, Table S2). Next, restriction enzyme digestion  
91 was performed using the 4-base cutter CviQI, followed by *in situ* proximity ligation to ligate Tn5 adaptor  
92 to the proximal genomic DNA. After *in situ* ligation, cross-links were reversed and the DNA was purified,  
93 digested by another 4-base cutter NlaIII, and circularized by re-ligation. The circularized DNA was used  
94 for PCR amplification to generate HiCAR DNA libraries for Next-Generation-Sequencing (NGS). Forward  
95 and reverse PCR primers (Table S2) were then used for library amplification, which anneal to the ME  
96 sequence and splint oligo sequence, respectively. Therefore, the resulting amplified chimeric DNA  
97 fragment contains one end derived from the CviQI digested genomic DNA (captured by Read 1 of each  
98 paired-end sequence, Fig 1A), and one end derived from the Tn5-tagmented open chromatin sequence  
99 (captured by Read 2 of each paired-end sequence, Fig 1A). Additionally, polyA RNAs from the cytoplasm  
100 and nucleoplasm were collected during the procedure (Fig 1A) and subjected to RNA-seq library  
101 preparation using a protocol modified from SMART-seq<sup>219</sup> (detailed in materials and methods).

102

103 HiCAR libraries were made from 3 biological replicates of H1 hESC and each library was sequenced  
104 to a depth of ~300 million pair-end raw reads (Table S3). We first examined the enrichment of HiCAR  
105 reads around open chromatin regions defined by H1 hESC ATAC-seq data generated by the 4DN  
106 consortium<sup>20</sup>. We separately analyzed Read 1 (R1) and Read 2 (R2) of the HiCAR DNA library, and used  
107 the publicly available H1 hESC *in situ* Hi-C data from the 4DN consortium<sup>20</sup> (Table S1) as a reference

108 dataset without targeted enrichment. As expected, HiCAR R2 reads were highly enriched at the H1 hESC  
109 ATAC-seq peaks (Fig 1B), while the R1 reads and *in situ* Hi-C reads show no enrichment (Fig 1B). This  
110 result confirmed that HiCAR successfully captured and enriched the interactions between open chromatin  
111 regions (R2) and other genomic regions (R1). We refer to these interactions below as “open-to-all”  
112 interactions. This is different from Trac-looping<sup>15</sup>, a different method capturing “open-to-open” interactions  
113 between pairs of open chromatin regions. Next, we compared the enrichment efficiency of HiCAR to that  
114 of Trac-looping and Ocean-C, two methods recently developed for mapping long-range interactions  
115 anchored at open chromatin regions<sup>15,16</sup>. Because HiCAR, Trac-looping and Ocean-C experiments were  
116 performed in different cell lines, we decided to assess open chromatin enrichment efficiency of each  
117 method by examining transcription start site (TSS) signal enrichment, a metric widely used as a quality  
118 control standard to compare signal-to-noise ratios of ATAC-seq data across different cell types<sup>21</sup>. We  
119 found that both HiCAR and Trac-looping reads show high TSS signal enrichment (Fig 1C, log<sub>2</sub> fold  
120 change = 1.02 and 0.84, respectively, Wilcoxon test, both  $p < 2.2e-16$ ), while Ocean-C reads show  
121 significant but much weaker enriched signal on TSS (Fig 1C, log<sub>2</sub> fold change = 0.30, Wilcoxon test  $p <$   
122  $2.2e-16$ ). We carried out a similar analysis by comparing HiCAR data to the public DNase Hi-C data (Fig  
123 S1A)<sup>12,13,20,22</sup>. In the previous DNase Hi-C study, the authors concluded that DNase Hi-C does not  
124 introduce open chromatin bias into the chromatin contact matrix<sup>22</sup>. Consistent with their results, we found  
125 that the DNase Hi-C reads are indeed not enriched on TSS regions (Fig S1A, brown line).

126  
127 We also performed a similar analysis to compare HiCAR data to the public HiChIP and PLAC-seq  
128 data (Fig S1A)<sup>12,13,20,22</sup>. As expected, we found that the signal enrichment of HiChIP and PLAC-seq at  
129 *cis*-regulatory sequences depends on the antibody used for chromatin immunoprecipitation (ChIP). For  
130 example, H3K4me3 modification is the mark of promoters<sup>23</sup>, and the sequencing reads from H3K4me3  
131 PLAC-seq data exhibited significant enrichment around TSS regions (Fig S1A, black line), whereas  
132 H3K4me1 (enhancer mark) HiChIP reads showed no enrichment on TSS (Fig S1A, purple line). Since  
133 open chromatin regions are bound by multiple TF and histone marks<sup>24</sup>, we expected HiCAR reads could  
134 enrich comprehensive epigenome signatures associated with *cis*-regulatory sequences. Indeed, we  
135 found that the HiCAR R2 reads, but not R1 reads, are highly enriched on H1 hESC H3K27ac, H3K3me1,  
136 H3K4me3, H3K27me3, RAD21, CTCF, NANOG, SOX2, and POU5F1 ChIP-seq peaks (Fig S1B). Our  
137 results clearly illustrated that while HiChIP and PLAC-seq only enrich the reads that are bound by the  
138 specific ChIP antibody, HiCAR effectively enriches a broader array of reads anchored at open chromatin  
139 regions (Fig 1C) and associated with a spectrum of epigenetic modifications and transcription factor  
140 binding (Fig S1A).

141

142 Given the relative low TSS-enrichment efficiency of Ocean-C (Fig 1C), we excluded Ocean-C from  
143 the following analysis and only compared HiCAR data to the public Trac-looping<sup>15</sup> data. We included one  
144 *in situ* Hi-C library that was generated by the 4DN consortium<sup>25</sup> and sequenced at similar depth (Fig 1D,  
145 373 million raw reads) as control data without targeted enrichment. Notably, HiCAR requires much less  
146 input material (100 thousand cells) than Trac-looping (100 million cells) and *in situ* Hi-C (2-5 million cells),  
147 while producing 4.15-fold more uniquely mapped PETs than Trac-looping (Fig 1D, 55.6% versus 13.4%).  
148 More importantly, compared to Trac-looping, HiCAR captured about 17-fold (18.3% versus 1.1%, blue  
149 bars in Fig 1E) more long-range (> 20kb) *cis*-PET, which are the informative reads to identify long-range  
150 chromatin interactions. Furthermore, we examined the genome-wide average contact frequency captured  
151 by HiCAR, *in situ* Hi-C, and Trac-looping. We found that HiCAR and *in situ* Hi-C show similar decay rate  
152 in capturing long-range chromatin interactions with increased linear genomic distance (Fig 1F), while  
153 Trac-looping captures more short-range (less than 7kb) chromatin contacts but fewer long-range  
154 interactions (Fig 1F). Overall, we concluded that HiCAR outperforms Trac-looping and allows for efficient  
155 and comprehensive capture of *cis*-regulatory chromatin contacts independent of antibody  
156 immunoprecipitation using low-input cells.

157

### 158 **HiCAR faithfully recapitulates the key features of high-order chromatin organization.**

159 Next, we asked if HiCAR could identify the key features of genome architecture. To probe this  
160 question, we used the deeply sequenced (total of 6.2 billion raw reads, generated by 4DN consortium<sup>20</sup>)  
161 *in situ* Hi-C data generated from H1 hESCs as a “gold standard” in our analysis. We first visually  
162 examined the global chromatin contact matrix (sequencing depth normalized) of HiCAR and *in situ* Hi-C  
163 (Fig 2A). We found that HiCAR generated chromatin contact matrix highly similar to that of *in situ* Hi-C at  
164 chromosomes, compartments, topological associated domains (TADs), and 10kb-bin resolutions (Fig 2A,  
165 left to right). To further quantify the similarity of the HiCAR and Hi-C contact matrices, we used HiCRep<sup>26</sup>  
166 to compute the stratum-adjusted correlation coefficient (SCC) among three HiCAR replicates and the *in*  
167 *situ* Hi-C data<sup>20</sup>. At the genome-wide scale, we found that the three biological replicates of HiCAR library  
168 were highly reproducible (Fig S1C, SCC=0.98), and HiCAR captured a chromatin interaction pattern  
169 similar to the deeply sequenced *in situ* Hi-C dataset (Fig S1C, SCC = 0.90, 0.89, 0.89). Further analysis  
170 revealed that the A/B compartment PC1 score, insulation score, and directionality index calculated from  
171 the HiCAR and *in situ* Hi-C data are well correlated with each other (Fig 2B).

172

173 Notably, the HiCAR contact matrix, built from 488 million uniquely mapped PETs, revealed as  
174 much, if not greater, details on chromatin interactions compared to the deeply sequenced (2.53 billion  
175 uniquely mapped PETs) *in situ* Hi-C data (Fig 2A). Next, we asked whether HiCAR can enrich the long

176 range *cis*-PETs anchored on cREs. To probe this question, we collected the open chromatin peaks and  
177 ChIP-seq peaks of H1 hESC identified by ATAC-seq and ChIP-seq datasets (including CTCF, H3K27ac,  
178 H3K4me1, H3K4me3, and H3K27me3 ChIP-seq), and set these peaks as the center of the sub-chromatin  
179 contact matrix expanding +/- 250kb window from each peak center. Next, we aggregated the PET signal  
180 (sequencing depth normalized) from all the sub-chromatin contact matrices. Interestingly, we found that  
181 the aggregated HiCAR PET signal showed a clear stripe pattern extending from the peak centers of all  
182 the examined epigenetic features (Fig 2C, top tracks). By contrast, the stripe patterns of PET signal from  
183 the aggregated Hi-C contact matrices are much weaker (Fig 2C, bottom track). Compared to *in situ* Hi-  
184 C, we concluded that HiCAR can effectively enrich long-range *cis*-PETs anchored at *cis*-regulatory  
185 sequences and associated with diverse histone modification and TF binding.

186

### 187 **HiCAR yields high-quality chromatin accessibility and transcriptome data from the same input** 188 **biological sample.**

189 In the HiCAR DNA library, the R2 reads are derived from the genomic sequences targeted by Tn5  
190 tagmentation (Fig 1A). Therefore, the R2 reads can be treated as the single-end ATAC-seq reads to map  
191 genome-wide open chromatin regions. In a HiCAR experiment, the cytoplasm and nucleoplasm polyA-  
192 RNA can also be collected for RNA-seq library preparation (Fig 1A, detailed in material and methods).  
193 After deep sequencing, we confirmed that the HiCAR RNA-seq data and the DNA R2 reads were highly  
194 reproducible between biological replicates (Fig S1D, Pearson correlation coefficient = 0.95 for RNA and  
195 0.87 for R2 reads). Next, we compared HiCAR RNA-seq to the public H1 hESC RNA-seq data (by  
196 ENCODE<sup>27</sup>), and the DNA library R2 reads to the ATAC-seq data (by the 4DN consortium<sup>25</sup>). As shown  
197 in Fig 2D, we observed very similar patterns of RNA and open chromatin signals on genome browser. At  
198 the genome-wide scale, the HiCAR RNA-seq data and the DNA R2 reads are highly correlated with the  
199 bulk RNA-seq and ATAC-seq datasets (Fig 2E, 2F, PCC = 0.91 and 0.77, respectively). We used  
200 MACS2<sup>28</sup> to call 1D open chromatin peaks from HiCAR R2 reads and compared to the ATAC-seq peaks.  
201 As shown in Fig 2G, we found that 57,069 (68.9% of total) HiCAR 1D peaks overlapped with ATAC-seq  
202 peaks. Further analysis revealed that the overlapping peaks are associated with more significant *p*-values  
203 (MACS2) in both ATAC-seq and HiCAR 1D peaks (Fig 2H). When we ranked the HiCAR 1D peaks based  
204 on their MACS2 *p*-value, we found that more than 82% of the high confidence 1D peaks (*p*-value < 10e-  
205 7) are validated by ATAC-seq peaks (Fig S1E). Taken together, HiCAR generated high-quality chromatin  
206 accessibility and transcriptome data using a single low-input sample.

207

### 208 **Identification of long-range *cis*-regulatory chromatin interactions in H1 hESC with HiCAR.**

209 HiCAR is designed to identify the long-range chromatin interactions anchored at cREs at high-  
210 resolution. To achieve this goal, we applied MAPS<sup>29</sup>, a method recently developed for HiChIP and PLAC-  
211 seq data, to the HiCAR dataset. Using MAPS, we first removed the potential systemic biases from the  
212 contact matrix, including GC content, sequence mappability, 1D chromatin accessibility, and the density  
213 of restriction enzyme cutting<sup>29</sup> (detailed in material and methods). In total, we identified 46,792 significant  
214 (MAPS FDR < 0.01) chromatin interactions at 5kb resolution and anchored on H1 hESC open chromatin  
215 regions (Table S4). Next, we evaluated the sensitivity of HiCAR in detecting known chromatin  
216 interactions. Since there is no “gold standard” set of true positive interactions, we decided to compare  
217 HiCAR interactions to chromatin interactions defined by well-established methods such as *in situ* Hi-C,  
218 PLAC-seq, and HiChIP in matched cell types. Specifically, we used the public *in situ* Hi-C and H3K4m3  
219 PLAC-seq data generated from H1 hESC by the 4DN consortium, as well as the CTCF HiChIP data  
220 generated from H9 hESC in a previous study<sup>20,30</sup>. Due to the lower sequencing depth of some public  
221 datasets, we decided to compare chromatin interactions at 10kb rather than 5kb resolution (Table S4).  
222 *In situ* Hi-C data was processed by HiCCUPS<sup>31</sup> while HiChIP and PLAC-seq data was processed by  
223 MAPS<sup>29</sup>. By visual examination of HiCCUPS loops and MAPS interactions in genome browser, we found  
224 that HiCAR interactions showed a similar pattern of loops and interactions identified by these well-  
225 established and widely used methods (Fig 3A). Interestingly, HiCCUPS loops (from *in situ* Hi-C data) and  
226 MAPS interactions (from H3K4me3 PLAC-seq and CTCF HiChIP data) represent a subset of the  
227 significant interactions identified by HiCAR (Fig 3A). To further quantify the sensitivity of HiCAR  
228 interactions, we filtered the *in situ* Hi-C loops and HiChIP/PLAC-seq interactions and only kept the  
229 “testable” loops and interactions with at least one anchor overlapping with ATAC-seq peaks for the  
230 following analysis. We found that HiCAR identified 92%, 81% and 69% of the “testable” loops and  
231 interactions identified by *in situ* Hi-C, H3K4me3 PLAC-seq, and CTCF HiChIP data, respectively (Fig 3B).  
232 These results indicate that HiCAR is a highly sensitive method in detecting “known” chromatin  
233 interactions identified by well-established methods.

234

235 Next, we assessed the precision of HiCAR-identified interactions. However, due to the lack of a  
236 complete list of “true interactions” in H1 hESCs, we instead asked whether HiCAR interactions  
237 recapitulate the known features of chromatin contacts. Based on the loop exclusion model,  
238 CTCF/Cohesin-associated loops have a preference for convergent CTCF motif orientations at loop  
239 anchors<sup>9</sup>. Thus, we examined the CTCF motif orientation of the HiCAR interactions identified by MAPS.  
240 We found that 62.8% of HiCAR interactions harbor convergent CTCF motifs on their anchors, and this  
241 ratio is comparable to that observed by PLAC-seq (Fig 3C, 60.3%). This result suggested that the  
242 precision of HiCAR in identifying interactions is comparable to PLAC-seq. Of note, there are more *in situ*



243 Hi-C loops (76.9%) anchored at the convergent CTCF motif (Fig 3C). We reasoned that such difference  
244 could be due the fact that HiCCUPS uses the local background model for loop calling, and therefore only  
245 identifies the most significant loop summits among a cluster of loops/interactions (Fig 3A). To further  
246 explore the regulatory role of HiCAR interactions on gene expression, we asked whether HiCAR  
247 interactions are enriched for expression quantitative trait loci (eQTL) and their associated genes (TSS)  
248 previously identified in human pluripotent stem cells (hPSC)<sup>32</sup>. We observed 5,368 human iPSC eQTL-  
249 TSS pairs overlapping with HiCAR loops, whereas only 3,228 eQTL-TSS pairs are expected to overlap  
250 with genomic region pairs which are randomly selected (shuffled 10,000 times) with linear distances  
251 matched to HiCAR interactions (Fig 3D, empirical  $p$ -value < 0.0001, detailed in material and Methods).  
252 The significantly enriched eQTL-TSS pairs at HiCAR interactions strongly suggest the regulatory role of  
253 HiCAR interactions on gene expression in human pluripotent stem cells.

254

255 Finally, to directly test the causal role of HiCAR interactions, we selected three putative *SOX2*  
256 enhancers for perturbation analysis. As shown in Fig 3E, two enhancers (#1 and #2) are located ~430kb  
257 from the *SOX2* TSS and enhancer #3 is located 788kb away from the *SOX2* TSS. All three candidate  
258 enhancers are open chromatin regions that form long-range interactions with the *SOX2* promoter as  
259 identified by HiCAR. We designed sgRNAs (Table S2) to specifically direct the epigenetic silencer dCas9-  
260 KRAB to the three candidate enhancers (Fig 3E). After introducing these CRISPR inhibition components  
261 into H1 hESCs to perturb these putative *SOX2* enhancers, we demonstrated significant down-regulation  
262 of *SOX2* mRNA expression by RT-qPCR (Fig 3F). Taken together, our results showed that HiCAR is a  
263 sensitive and accurate method to identify high-confidence *cis*-regulatory chromatin interactions at high-  
264 resolution. More importantly, HiCAR interactions likely reflect functional communication between *cis*-  
265 regulatory elements and their distal target genes.

266

267 **The epigenetically poised, bivalent and repressed chromatin sequences exhibit extensive spatial**  
268 **activity comparable to the active chromatin regions.**

269 Regulatory open chromatin sequences are associated with an array of diverse epigenome  
270 signatures. Therefore, we sought to determine whether the HiCAR interactions can enrich cRE-  
271 interactions anchored on different chromatin states. We took the 18-chromatin states annotation of H1  
272 hESC defined by ChromHMM<sup>2,17,33,34</sup>, and compared the enrichment fold of HiCAR interactions on each  
273 state to that of HiCCUPS loops identified by H1 hESC *in situ* Hi-C (Fig 4A). We found that HiCAR  
274 interactions showed higher enrichment fold across multiple chromatin states, including enhancers,  
275 promoters, and regions associated with active, poised, bivalent, and repressed states (Fig 4A, the  
276 chromatin states highlighted in blue text). Interestingly, compared to HiCCUPS loops, HiCAR interactions

277 are depleted at three chromatin states, namely Quiescence/low (Quies), ZNF genes & repeats  
278 (ZNF/Rpts), and Heterochromatin (Het). We reasoned that the depletion of HiCAR interactions on these  
279 three states could be due to the lack of open chromatin regions on those sequences, as the “Quies” state  
280 lack any known marks associated with cRE, while the “ZNF/Rpts” and “Het” sequences are highly  
281 enriched for the heterochromatin mark H3K9me3<sup>34</sup>. Next, we examined how often one chromatin state  
282 is interacting with all 18 chromatin states, and assessed whether the observed interaction frequency  
283 between two chromatin states is over- or under-represented compared to the genome-wide background  
284 (Table S5). Interestingly, we found that the chromatin regions associated with similar epigenome states  
285 (epigenetically “active” states versus “inactive” states, such as repressive/poised/repressed) tend to  
286 interact with each other (Fig 4B, blue dots denote the “inactive-inactive” interaction”; red dots denote the  
287 “active-active” interaction). On the contrary, the HiCAR interactions connecting the “active” versus  
288 “inactive” chromatin states are significantly under-represented (Fig 4B, purple dots). Our results  
289 suggested that the spatial proximity of cREs may play a role in facilitating the coordinated epigenomic  
290 modification of cis-regulatory sequences.

291  
292 Intrigued by the observation that both “active-to-active” and “inactive-to-inactive” interactions are  
293 significantly enriched among the HiCAR interactions (Fig 4B), we decided to directly compare the  
294 interactions anchored on the “active” versus “inactive” (poised/bivalent/repressed) chromatin states. In  
295 ChromHMM, histone H3K27me3 modification is the common histone mark to annotate the poised,  
296 bivalent, and repressed chromatin states, while the H3K27ac mark is used to denote transcriptionally  
297 active chromatin regions<sup>34</sup>. We selected 14,845 and 10,287 HiCAR interactions with at least one anchor  
298 overlapped with H1 hESC H3K27ac or H3K27me3 ChIP-seq peaks, respectively. The interactions  
299 overlapped with both H3K27ac and H3K27me3 peaks were excluded from the following analysis.  
300 Notably, using HiCAR, the two types of interactions were captured from one single assay independent of  
301 antibody-specific ChIP enrichment, and therefore can be directly compared in terms of their numbers,  
302 interaction strength/confidence, and transcriptional/enhancer activity. As expected, genes with promoters  
303 located on H3K27ac anchors, had significantly higher mRNA expression levels compared with genes  
304 with promoters located on H3K27me3 anchors (Fig 4C, Wilcoxon rank-sum,  $p < 2.2e-16$ ). Interestingly,  
305 when we compared the interaction strength quantified by  $-\log_{10}$  FDR (output from MAPS) between the  
306 two types of interactions, the H3K27me3-anchored interactions showed a similar distribution of FDR,  
307 which are indistinguishable from the interactions anchored on H3K27ac peaks (Fig 4D, Wilcoxon rank-  
308 sum,  $p = 0.59$ ). We also found that the H3K27me3-anchored interactions showed significantly longer  
309 linear genomic distance (median distance 145kb) than the H3K27ac-anchored interactions (median  
310 distance 125 kb) (Fig 4E, Wilcoxon rank-sum,  $p < 2.2e-16$ ). Furthermore, through gene ontology (GO)

311 analysis, we found that the genes with promoters located on the H3K27ac-anchored interactions are  
312 enriched for GO terms related to transcription, metabolic, chromatin organization, and stem cell  
313 proliferation/maintenance (Fig S2A), while genes associated with H3K27me3 anchors are enriched for  
314 GO terms important for lineage specific tissue and organ differentiation/development (Fig S2B). This GO  
315 enrichment analysis suggests that the two types of interactions may play different roles in regulating gene  
316 expression in distinct biological processes. In summary, our results showed that the epigenetically  
317 “inactive” (poised, bivalent, and repressed) cREs tend to form massive, long-range, and significant  
318 chromatin interactions that are comparable to the interactions associated with “active” cREs.

319

### 320 **Identification of epigenome features important for the spatial interaction activity of *cis*-regulatory** 321 **sequences in H1 hESC**

322 Our high-resolution (5kb bin) cRE-contact map and the rich public epigenome datasets available  
323 for H1 hESC (Table S1) gave us the opportunity to study the epigenome features important for the spatial  
324 activity of cREs. To probe this question, we employed a method described previously<sup>35,36</sup> to calculate  
325 the cumulative interactive score (sum of  $-\log_{10}$  FDR) of each HiCAR interaction anchor (5kb bin) (Table  
326 S6, detailed in material and methods). Interestingly, when we compare this cumulative interactive score  
327 with gene expression (Fig S3A, mRNAs expressed from the gene promoters overlapped with anchors),  
328 enhancer activity (Fig S3B, H3K27ac ChIP-seq signal on anchors), and chromatin accessibility (Fig S3C,  
329 ATAC-seq signal on anchors), we found that the spatial interaction activity of cREs exhibit very weak  
330 Pearson correlation coefficients with gene expression (PCC = 0.06), enhancer activity (PCC = 0.05) and  
331 chromatin accessibility (PCC = 0.13). We then asked what are the chromatin epigenome features  
332 important for the spatial activity of cREs. To address this question, we identified the cREs associated  
333 with high-level chromatin interaction activity. We ranked all 42,463 anchors based on their cumulative  
334 interactive score, and identified 2,096 anchors (Fig 5A, red dots) with extremely high-level spatial  
335 interaction activity compared to other anchors (Table S6, detailed in material and methods). Consistent  
336 with our observation that the spatial activity of cREs exhibit only weak, if any, correlation with  
337 transcriptional activity (Fig S3A), we found that the mRNA levels of the genes with promoters located on  
338 the 2,096 interaction hotspots are very similar to those of genes with promoters overlapped with regular  
339 HiCAR anchors (Fig S3D, S3E, Wilcoxon rank-sum  $p = 0.96$ ). Next, in order to determine the epigenome  
340 features associated with these interaction hotspots, we analyzed the public ChIP-seq datasets generated  
341 from H1 hESCs (Table S1) including 26 histone mark and 49 TF binding<sup>2,17,27,37</sup>. We identified 9 proteins  
342 (KDM1A, HDAC2, RAD21, YY1, CTCF, CTBP2, RNF2, TCF12, and RNA Pol2) and 11 histone marks  
343 (H2BK12ac, H2BK15, H2BK20ac, H2AK5ac, H2BK5ac, H3K4me1, H3K4m2, H3K4me3, H3K27me3,  
344 H4K8ac, and H3K18ac) that are significantly enriched on the cRE-interaction hotspots (Fig 5B, red dots,

345 fold change > 1.2, FDR < 0.05; detailed in Table S7). 7 of these 20 enriched histone marks and TF  
346 binding signatures (RAD21, YY1, CTCF, RNF2, RNA Pol2, H3K4me1, and H3K27me3) were shown in  
347 previous studies to play important roles in regulating 3D chromatin<sup>38–48</sup>, while the involvement of the  
348 other features in genome organization remains large unexplored. Interestingly, ZNF274, a transcriptional  
349 repressor important for the establishment and maintenance of the heterochromatin mark H3K9me3<sup>49</sup>, is  
350 depleted on the open chromatin interaction hotspots compared to regular HiCAR anchors (Fig 5B, blue  
351 dot).

352

353 Finally, in order to gain a more comprehensive view of the epigenome features important for the  
354 spatial activity of chromatin, we used machine learning approaches to investigate the contribution of 26  
355 histone modifications and the binding of 49 different TFs on chromatin spatial activity. We applied five  
356 regression methods<sup>50,51</sup>, namely Decision tree, Linear regression, XGBoost, Random forest, and Linear-  
357 kernel support vector machine (Linear SVM), to define the 15 top-ranked features from each model (Fig  
358 S4A, Table S8, detailed in material and methods). The five regression models have similar performance  
359 as indicated by comparable mean squared error (MES) and mean absolute error (MAE) (Fig S4B). In  
360 order to identify the high-confident epigenome features important to chromatin's spatial interactive  
361 activity, we required the positive features, defined as "union features", to be identified by at least two  
362 models independently. Using this approach, we predicted 22 "union features" as important for the spatial  
363 activity of chromatin (Fig 5C). Among these union features, Cohesin (RAD21), CTCF, and ZNF143 are  
364 the well-known regulators important for 3D genome organization<sup>46–48</sup>. We also identified additional  
365 features, such as pluripotency factor POU5F1, the PRC1 core component RNF2 (also known as  
366 RING1B), histone H3K27me3 modification, and transcription activation marks  
367 H3K36me3/H4K20me1/RNA Pol2, with known function in regulating high-order chromatin organization  
368<sup>38–44</sup>. The identification of multiple union features with previously validated roles in regulating high-order  
369 chromatin organization (Fig 5C, highlighted in blue) suggests that our models are capable of accurately  
370 predicting regulators that are important for chromatin interaction activity.

371

### 372 **Identification of long-range *cis*-regulatory chromatin interactions in GM12878 and mouse** 373 **embryonic stem cells (mESCs) with HiCAR.**

374 Lastly, In order to demonstrate the general applicability of HiCAR in other cell types, we applied  
375 HiCAR to human lymphoblastoid cell line GM12878 and mouse embryonic stem cells (mESCs). For each  
376 cell type, we used ~100,000 cells as input sample and generated high quality HiCAR DNA libraries (Table  
377 S3). Using the same approach described in Fig 3A-3C, we identified 42,459 and 91,809 significant (MAPS  
378 FDR < 0.01) high resolution (10kb bin) interactions in GM12878 and mESCs, respectively (Fig S5A, S5B;

379 Table S9, S10 for the full list of MAPS interactions and HiCCUPS loops identified in GM12878 and  
380 mESCs). Consistent with our analysis in H1 hESC, the GM12878 and mESC HiCAR interactions showed  
381 high sensitivity in detecting the “testable” HiCCUPS loops and MAPS interactions identified by *in situ* Hi-  
382 C, HiChIP, and PLAC-seq in GM12878 and mESCs (Fig S5C and Fig S5D). Importantly, 72.4% of  
383 GM12878 interactions and 63.7% mESC interactions identified by HiCAR harbor convergent CTCF motifs  
384 on their anchor regions. This ratio is comparable to that observed in GM12878 SMC1A HiChIP (75.8%),  
385 mESC CTCF PLAC-seq (62.7%), and mESC H3K4me3 PLAC-seq (55.7%), but lower than the ratio  
386 detected in HiCCUPS loops identified by *in situ* Hi-C in GM12878 (89.8%) and in mESC (86.7%) (Fig  
387 S5E, S5F). These results illustrate that the precision of HiCAR interaction called from GM12878 and  
388 mESC is comparable to that of PLAC-seq and HiChIP interactions. Successful identification of these  
389 high-confidence cis-regulatory chromatin interactions in GM12878 and mESCs clearly demonstrated the  
390 broadly applicability of HiCAR.

391

## 392 **Discussion:**

393 We applied HiCAR, a novel co-assay, in H1 hESC and identified 46,792 significant long-range  
394 chromatin interactions anchored on open chromatin regions at 5kb resolution. By integrating public  
395 epigenome datasets generated by the ENCODE, Epigenome Roadmap, and 4DN consortiums using the  
396 same H1 hESC line, we found that the epigenetically poised, bivalent, and repressed chromatin states  
397 can form massive, significant, and long-range chromatin interactions that are comparable to the  
398 interactions associated with active chromatin states. Consistent with the findings from recent H3K27me3  
399 HiChIP and PRC2 ChIA-PET studies<sup>38,52</sup>, the H3K27me3-anchored HiCAR interactions are enriched for  
400 genes that are silenced in pluripotency stem cells but important for tissue and organ development.  
401 Importantly, the high-resolution chromatin contact map generated by HiCAR provided the unique  
402 opportunity to compare the high-resolution cRE-anchored interactions associated with distinct  
403 epigenome modifications and chromatin states. Our analysis showed that the cREs with similar chromatin  
404 states (“active”, or “inactive”) tend to interact with each other more frequently, while the interactions  
405 between “active” versus “inactive” chromatin states are less frequent. These results suggest that the long-  
406 range chromatin interaction may play a role in coordinating epigenome modifications of cREs across  
407 linearly separated genomic loci.

408

409 Another interesting finding revealed by HiCAR analysis is that there appears to only be a weak  
410 correlation between cRE spatial interaction activity and transcriptional activity, enhancer activity, and  
411 chromatin accessibility. By integrating HiCAR data with public epigenome data, we identified 20 histone  
412 marks and TF binding interactions that are significantly enriched on cRE-anchored interactions hotspots.

413 We applied five machine learning approaches to predict 22 “union features” important for the spatial  
414 interaction activity of cREs in H1 hESC. Many of the epigenetic signatures which are enriched on HiCAR  
415 interaction hotspots or predicated by machine learning -- such as CTCF, Cohesin, ZNF143, POU5F1,  
416 RNF2, H3K27me3, H3K4me1 - as well as active transcription marks including H3K36me3, H4K20me1,  
417 RNA Pol2) are known regulators of 3D genome structure. In the future, it would be very interesting to  
418 explore the roles of these epigenome features in regulating genome architecture.

419

420 With HiCAR data, we identified 2,096 open chromatin-anchored interaction hotspots in H1 hESCs.  
421 In previous studies, other groups carried out similar analyses with *in situ* Hi-C and PLAC-seq data, and  
422 discovered frequently interacting regions (FIREs)<sup>35</sup> and super-interactive promoters (SIPs)<sup>36</sup> in the  
423 human genome. Like FIREs and SIPs, HiCAR interaction hotspots exhibit unusually high chromatin  
424 interaction activity compared to other genomic loci. Notably, FIREs are enriched for super-enhancers and  
425 are near genes that are tissue-specifically expressed in 21 primary human tissues and cell types. HiCAR  
426 interaction hotspots, however, are not enriched for the super-enhancer mark H3K27ac. Our GO  
427 enrichment analysis found that GO terms overrepresented on HiCAR interaction hotspots predominantly  
428 related to cell proliferation, chromatin organization, as well as neuronal, cardiovascular, blood vessel,  
429 and skeletal system differentiation. (Table S6). Unexpectedly, we did not find pluripotency genes or  
430 pluripotency related GO terms enriched on HiCAR interaction hotspots. In contrast, SIPs are enriched for  
431 lineage-specific genes in human brain cells. We hypothesize that these differences between HiCAR  
432 interaction hotspots, FIREs, and SIPs may be due to two potential phenomena: (1) the genome  
433 organization of hESCs is intrinsically different from that of terminally differentiated cells found in human  
434 adult tissues; or (2) *in situ* Hi-C, PLAC-seq, and HiCAR each capture a subset of the “true” interactions  
435 present in the 3D genome. Therefore, FIREs (by Hi-C), SIPs (by H3K4me3 PLAC-seq), and HiCAR  
436 interaction hotspots may represent the top ranked interaction hotspots or hubs that are sampled from  
437 different types of chromatin interactions. To test this hypothesis, in the future, it would be interesting to  
438 carry out a systematic analysis with well controlled samples, experimental methods, computational  
439 pipelines, and potentially with new approaches independent of 3C<sup>53</sup>.

440

441 Most importantly, we showed that HiCAR is a robust, sensitive, and cost-effective method that can  
442 be used to simultaneously study genome architecture, chromatin accessibility, and the transcriptome  
443 from the same low-input samples. Compared to existing methods, the technical advantages of HiCAR  
444 are multifold. HiCAR requires substantially less sequencing depth than *in situ* Hi-C to identify high-  
445 resolution, significant, long-range chromatin interactions anchored on cREs. Second, compared with  
446 HiChIP and PLAC-seq, HiCAR does not rely on ChIP-grade antibody-mediated immunoprecipitation to

447 pull down chromatin interactions bound by a specific protein or histone modification. Thus, HiCAR  
448 enables comprehensive analysis of open chromatin-anchored interactions associated with an array of  
449 diverse histone mark, TF binding, and chromatin states. Third, compared to state-of-the-art methods such  
450 as Trac-looping, with similar sequencing depth, HiCAR generates ~17-fold more informative long-range  
451 cis-PETs despite starting from 1,000-fold lower input cell number. Fourth, by applying HiCAR in GM12878  
452 and mESCs, we showed that HiCAR is a sensitive and robust assay which is broadly applicable in  
453 multiple cell types with low input samples. Taken together, our results clearly demonstrated the technical  
454 advancement and general applicability of HiCAR, which can be used for multimodal analysis of low-input  
455 materials.

456 **Accession Codes and Data Availability:**

457 Sequencing data have been deposited to the NCBI Gene Expression Omnibus (GEO)  
458 (<http://www.ncbi.nlm.nih.gov/geo/>) under accession number GSE162819. Additional materials, data,  
459 code, and associated protocols are available upon request.

460

461 **Acknowledgements:**

462 We thank Drs. Kenneth Poss (Duke University), Brigid Hogan (Duke University) and David Gorkin (Emory  
463 University) for feedback on previous versions of the manuscript. This work is supported by Duke  
464 Whitehead Scholar (to Y.D.), startup fund from Duke School of Medicine and Regeneration Next Initiative  
465 (to Y.D.), and National Institute Health (NIH) 4D Nucleome Consortium Phase 2 project U01HL156064  
466 (to Y.D.). Y.X. is supported by the post-doctoral fellowship from Regeneration Next Initiative (RNI) at  
467 Duke University.

468

469 **Author contributions:**

470 X.W. and Y.D. conceived the idea for HiCAR; X.W. performed the experiments with help from T.S., and  
471 X.L.; Y. X. conducted data analysis with help from X.W., R.S., and W.L.; X.W., Y.X., and Y.D. wrote the  
472 paper.



## 473 **Figure legends**

### 474 **Figure 1. Overview of HiCAR experimental design and HiCAR data quality control.**

475 **(A)** In a HiCAR experiment, the nuclei are isolated from cross-linked cells and treated by Tn5 transposase  
476 loaded with engineered DNA adaptors, followed by restriction enzyme digestion with 4 base cutter CviQI  
477 and in situ ligation. The engineered Tn5 adaptors can be ligated to the proximal genomic DNA digested  
478 by CviQI. After in situ ligation, the genomic DNA are purified after reverse crosslinking, and subjected to  
479 a second restriction enzyme digestion by another 4 base cutter NlaIII. Then resulting DNA fragments are  
480 circularized and PCR amplified for deep sequencing. The DNA sequences amplified from the splint oligo  
481 sequence and the Tn5/ME region are defined as R1 reads and R2 reads, respectively. The cytoplasm  
482 and nuclei RNA fractions are collected and pooled together for RNA-seq analysis **(B)** The aggregated  
483 signals of HiCAR R2 reads (red), R1 reads (blue), and in situ Hi-C (black) within +/- 3kb window centered  
484 at H1 hESC ATAC-seq peaks. The HiCAR R1, R2 and Hi-C reads are normalized against sequence  
485 depth (counts per million). Signal coverage (y-axis) was calculated as sequencing read depth per base  
486 within +/- 2kb window of peak center. **(C)** The aggregated signals of HiCAR R2 reads (red), Trac-looping  
487 reads (green), Ocean-C reads (orange), and in situ Hi-C reads (blue) within +/- 2kb window centered at  
488 TSS. Enrichment was calculated by comparing the normalized reads signal on peak center against the  
489 signal at +/- 2kb region. **(D)** The number of input cells and sequencing outputs of three methods. **(E)**  
490 Percentage of uniquely mapped short range (<20kb) cis, long range (>=20kb) cis, and the trans (inter-  
491 chromosomal) reads from HiCAR, in situ Hi-C and Trac-looping data. **(F)** Contact frequency as a function  
492 of distance measured by HiCAR, in situ Hi-C and Trac-looping data.

493

### 494 **Figure 2. HiCAR captures the key features of chromatin organization, chromatin accessibility and** 495 **transcriptome.**

496 **(A)** The contact matrices of H1 hESC obtained from HiCAR (top right, above the diagonal) and in situ Hi-  
497 C (bottom left, below the diagonal) data at successive zoom-in views. The H1 hESC in situ Hi-C data was  
498 obtained from 4DN data portal. The color represents sequence depth normalized reads signal (counts  
499 per million mapped reads). **(B)** Scatter plots show the global correlation of compartment scores (top  
500 panel), TAD insulation score (middle panel) and TAD directionality index (bottom panel) computed from  
501 HiCAR and in situ Hi-C, respectively. The R value: Pearson correlation coefficient. **(C)** Aggregated HiCAR  
502 (top) and in situ Hi-C (bottom) contact matrix (10kb bin) within +/- 250kb window centered on the indicated  
503 peak regions of H1 hESC. **(D)** A representative genome browser view showing the signals of HiCAR  
504 RNA-seq (pink) and HiCAR 1D open chromatin profile (light blue). The red track indicates the H1 hESC  
505 bulk RNA-seq and the dark blue track indicates ATAC data, downloaded from ENCODE and 4DN data  
506 portal, respectively. **(E-F)** Scatter plots showing the correlation of **(E)** HiCAR RNA-seq vs. bulk RNA-seq  
507 dataset, and **(F)** HiCAR R2 reads v.s. ATAC-seq reads. **(G)** Venn diagram showing open chromatin peaks  
508 identified by HiCAR R2 reads (1D open chromatin peaks) and ATAC-seq in H1 hESC. MACS2 was used  
509 for peak calling. **(H)** We compared the open chromatin peaks identified by HiCAR R2 reads and ATAC-  
510 seq. The overlapping open chromatin peaks and the non-overlapping peaks are separated. Boxplot  
511 showing the distribution of the MACS2 P-value of the peaks. Wilcoxon rank-sum test was used for  
512 statistical analysis to compute P value.

513 **Figure 3. Identify long-range cis-regulatory chromatin interactions with HiCAR.**  
514 **(A)** Genome browser screenshot showing ChIP-seq (NANOG, SOX2, CTCF, H3K4me1, H3K4me3),  
515 RNA-seq, ATAC-seq of H1 hESC, as well as the chromatin loops and interactions identified by HiCAR,  
516 CTCF HiChIP, H3K4me3 PLAC-seq and in situ Hi-C data with H1 or H9 hESCs. **(B)** The chromatin loops  
517 and interactions with at least one anchor overlapping with ATAC-seq peaks are defined as “testable”  
518 loops/interactions. We calculated the proportion of the “testable” loops/interactions that can be  
519 discovered by HiCAR interaction to estimate the sensitivity of HiCAR interaction calling. **(C)** We examined  
520 the orientation of CTCF motif located on the pairwise anchors of each chromatin loop and interactions.  
521 The length of the color bar indicates the proportion of convergent, tandem and divergent CTCF motif  
522 pairs among tested HiCCUPS loops and MAPS interactions. **(D)** The TSS-eQTL pairs identified in human  
523 pluripotent stem cells are significantly enriched on HiCAR interactions. Red line: the number of observed  
524 eQTL-TSS pairs overlapping with HiCAR interactions. The histogram represents the distribution of the  
525 number of eQTL-TSS pairs overlapped with randomly sampled (10,000 times shuffling) pairwise DNA  
526 regions with matched linear genomic distance to HiCAR interactions. (Empirical p-value < 0.0001). **(E)**  
527 Genome browser screenshot showing H1 hESC ATAC-seq track and HiCAR interactions near SOX2  
528 locus. The three arrowheads point to the three candidate SOX2 enhancers (highlighted in light blue). **(F)**  
529 The sgRNAs were designed to specifically target the SOX2 candidate enhancers showing in (E). The H1  
530 hESC were infected by lentiviral vectors expressing dCas9-KRAB together with control sgRNA or the  
531 sgRNAs targeting enhancer regions. After lentiviral infection, the hESCs were selected by Puromycin for  
532 3-days, then cultured for another 7-days without Puromycin. The total RNA was extracted and subjected  
533 to RT-qPCR analysis. The mRNA level of SOX2 was normalized against housekeeping gene GAPDH.  
534 The data was collected from three biological replicates. P values are calculated by two-tailed Student’s t  
535 test.

536  
537 **Figure 4. The poised, bivalent, and repressed chromatin regions form massive, long-range, and**  
538 **significant chromatin interactions comparable to the active chromatin states.**

539 **(A)** We took the anchor (5kb bin) sequences of all interactions identified by HiCAR, and calculated the  
540 “observed” number of anchors overlapped with each individual chromatin state defined by chromHMM.  
541 Based on the genome-wide distribution of each chromHMM state, we also calculated the “expected”  
542 number of anchors overlapped with each state. The fold change (y-axis) of HiCAR interaction for each  
543 chromHMM state was calculated as “observed/expected”. The fold change of Hi-C loops for each  
544 chromHMM state was calculated in the same way. The 18-states ChromHMM annotation: TssA: Active  
545 TSS, TssFlnk: Flanking TSS, TssFlnkU: Flanking TSS Upstream, TssFlnkD: Flanking TSS Downstream,  
546 Tx: Strong transcription, TxWk: Weak transcription, EnhG1: Genic enhancer1, EnhG2: Genic enhancer2,  
547 EnhA1: Active Enhancer 1, EnhA2: Active Enhancer 2, EnhWk: Weak Enhancer, ZNF: Rpts ZNF genes  
548 & repeats, Het: Heterochromatin, TssBiv: Bivalent/Poised TSS, EnhBiv: Bivalent Enhancer, ReprPC:  
549 Repressed PolyComb, ReprPCWk: Weak Repressed PolyComb, Quies: Quiescent. **(B)** Based on HiCAR  
550 interaction, we first computed the “observed” interaction frequency of pairwise chromatin states (total 18  
551 states determined by ChromHMM). Next, based on the genome-wide distribution of each chromHMM  
552 state, we computed the “expected” interaction frequency between any two states. The fold change of  
553 pairwise interaction frequency and P-value were calculated using the “annotateInteractions” function from  
554 Homer. X-axis:  $\log_2$  (fold change) of “observed” interaction frequency over “expected” interaction  
555 frequency. Y-axis:  $-\log_{10}(\text{FDR})$ , the FDR is the output from HOMER. Red dots: the interactions between  
556 “active” chromatin states; Blue dots: the interactions between “inactive” states, including

557 bivalent/repressed/poised chromatin states; Purple dots: the interactions between “active” versus  
558 “inactive” states. **(C-D)** We selected 14,845 and 10,287 HiCAR interactions with at least one anchor  
559 overlapped with H3K37ac and H3K27me3 peaks, respectively. For these two types of interactions  
560 (H3K27ac v.s. H3K27me3), we compared **(C)** the mRNA level of genes expressed from the promoters  
561 located on anchors; **(D)** interaction strength quantified by  $-\log_{10}$  FDR, the FDR is output from MAPS; and  
562 **(E)** the linear genomic distance between anchors of interactions. Boxplot: P value is calculated from  
563 Wilcoxon rank-sum test.

564

565 **Figure 5. The epigenome features important for chromatin spatial interactive activity.**

566 **(A)** The 5kb anchors of HiCAR interactions are ranked along the x-axis based on their cumulative  
567 interactive score (sum of  $-\log_{10}$  FDR, y-axis). FDR is the output of MAPS of each significant interaction.  
568 Total 2,096 anchors were identified as interaction hotspots associated with abnormal high level  
569 interactive score (red dots, detailed in methods). **(B)** Scatterplot showing the significantly enriched (red  
570 dots) or depleted (blue dot, ZNF274) histone mark and TF binding on interaction hotspots versus regular  
571 interaction anchors. Total 75 public ChIP-seq data listed in Table S1 was used for signal enrichment  
572 analysis. **(C)** We employed five machine learning algorithms, including Decision tree, Linear regression,  
573 XGBoost, Random forest, and Linear-kernel support vector machine, to predict the top ranked epigenome  
574 features that are potentially important for the spatial interactive activity of cREs. The “union features” are  
575 defined as the features predicted by at least two algorithms. The features highlighted in blue color are  
576 the features with known function in regulating 3D chromatin interactions.

577 **Materials and methods:**

578 **Cell culture and crosslink.**

579 H1 hESCs (WiCell, WA01) were cultured in Matrigel (corning, 354230) coated plates with Stabilized  
580 feeder-free maintenance medium mTeSR™ Plus (STEMCELL, #05825). mTeSR™ Plus was changed  
581 every other day. For crosslinking, cells were washed once by PBS, then treated by accutase (biolegend,  
582 #423201) for 10mins at 37°C. After removing the accutase, cells were resuspended by DMEM.  
583 Formaldehyde was added to the final concentration of 1%, incubated at room temperature for 10mins.  
584 Glycine was added to the final concentration of 0.2M, incubated at room temperature for 10 mins to  
585 quench formaldehyde. Fixed cells were pelleted by centrifugation for 5 min at 4°C and washed with ice-  
586 cold PBS once

587

588 **Tn5 Purification**

589 Briefly, Rosetta DE3 cells transformed with Tn5 expression plasmid pTXB1-Tn5 (Addgene #60240) were  
590 cultured in 500ml LB and incubated at 16°C overnight for protein induction. The bacteria were collected  
591 by centrifuge and resuspend by pre-cooled HEGX (40mM Hepes-KOH pH 7.2, 1.6M NaCl, 2 mM EDTA,  
592 20% Glycerol, 0.4% Triton-X100, Roche Complete Protease Inhibitor), sonicated to release the protein.  
593 PEI (10% PEI, 4.44% HCl, 800mM NaCl, 20mM Hepes, 0.3mM EDTA, 0.2% Triton X-100, pH 7.2) were  
594 then added to the lysate in dropwise to precipitate the E. coli DNA. The lysate was then centrifuged and  
595 supernatant was loaded to Chitin column (BIO-RAD, #7372522). The column was rotated at 4°C for 2-  
596 3h then washed by HEGX buffer. 15ml HEGX buffer containing 100mM DTT was added to elute the  
597 protein. The column was incubated for another 24 hr at 4°C. The elution fraction was collected and  
598 concentrated to about 1ml by Amicon Ultracel 30K (Millipore, #UFC903024), then dialyzed twice by 1L  
599 dialysis buffer (100 HEPES-KOH pH 7.2, 0.2 M NaCl, 0.2 mM EDTA, 2 mM DTT, 0.2% Triton X-100,  
600 20% glycerol) for 24h using dialysis membrane tube (Spectra, D1614-11). Then the protein was added  
601 80% glycerol to a final concentration of 50%.

602

603 **Tn5 transposase assembly**

604 To assemble Tn5, 50ul of 200mM ME-rev and 50ul of 200mM Bfal-truseqR1-pmel-nextera7 (Table S2)  
605 were annealed by the following program: 95°C 5min, cool to 14°C with a slow ramp 1°C /min. The  
606 annealed adaptor was mixed with Tn5 Transposase in 1: 1.5 molar ratio, the mixture was mixed by pipette  
607 and incubated at room temperature for 30mins.

608

609 **HiCAR protocol**

610 Step1. Nuclei preparation and tagmentation:

611 100,000 crosslinked cells were treated by 1ml NPB (PBS containing 5% BSA, 1mM DTT, 0.2% IGEPAL,  
612 Roche Complete Protease Inhibitor) at 4°C for 15min to isolate the nuclei. After centrifugation, the  
613 supernatant containing cytoplasm RNA was saved for future RNA-seq analysis. The isolated nuclei were  
614 resuspended in 350ul 2X TB buffer (66mM Tris-AC pH 7.8, 132mM K-AC, 20mM Mg-AC, 32% DMF),  
615 335ul water and 15ul assembled Tn5 transposome. The oligos used for Tn adaptors are listed in Table  
616 S2).

617

#### 618 Step 2. CviQI digestion and in situ ligation

619 After tagmentation, the nuclei were permeabilized by 2% SDS at 62°C for 10 minutes. After centrifugation  
620 at 850g for 5min, the supernatant containing nuclei RNA was collected for future RNA-seq library  
621 construction. The nuclei were then digested in 90ul 1.1X NEBuffer 3.1 containing 100U CviQI (NEB,  
622 #R0639L) After digestion, we added 48ul 10X T4 ligation buffer, and 2ul T4 DNA ligase (400U/ul, NEB,  
623 #M0202S) for in situ ligation with TruseqR1 oligo (Table S2) at room temperature for 4h.

624

#### 625 Step 3. Reverse crosslink and DNA purification

626 After centrifugation, the supernatant was discarded. The nuclei were resuspended in 200ul of 10mM Tris-  
627 HCl (pH 8.0), 5ul Proteinase K (Thermofisher, #AM2546), 10ul 20% SDS, incubated at 60°C for 30min.  
628 Next, we added 22ul 5M NaCl to the buffer and incubated the nuclei at 68°C for at least 1h to reverse  
629 crosslink. The DNA was purified by Phenol:Chloroform:Isoamyl Alcohol (25:24:1, v/v, SPECTRUM,  
630 #136112-00-0) treatment followed by ethanol precipitation. The DNA was dissolved by 21ul 10mM Tris-  
631 HCl (pH8.0).

632

#### 633 Step 4. NlaIII digestion, circularization, and DNA library amplification by PCR

634 The purified DNA was incubated with 4ul 10mM dNTP, 5ul 10X Cutsmart buffer 1.5ul T4 DNA polymerase  
635 (NEB, # M0203L) and 20.5ul H2O at room temperature for 30min to repair the Tn5 transposition gap.  
636 Next, the reaction was incubated at 75°C for 20min to inactivate T4 DNA polymerase. After that, 43ul  
637 water, 5ul 10X CutSmart buffer, and 2ul NlaIII (NEB, # R0125L) were added into the sample followed by  
638 incubation at 37°C for 1h. The digested DNA was purified by 0.9X (90ul) volume SPRI beads (BECKMAN,  
639 # B23319), and dissolved in 80ul 10mM Tris-HCl (pH8.0) buffer. Next, the DNA was diluted to 0.6ng/ul  
640 and circulated in T4 Ligation Buffer by T4 DNA ligase (400U/ul, NEB, #M0202S). The sample is mixed  
641 and incubated at room temperature for at least 2h. The DNA was purified by DNA clean & concentrator  
642 kit (Zymo, #D4013) and eluted in 20ul water. The PCR library amplification was performed using the  
643 following program (step 1: 72 °C 5 min, 98 °C 30 s; step 2: 98 °C 10 s, 59 °C 30 s, 72 °C 45s, repeating  
644 step 2 for an additional 11 cycles; step 3: 72°C 5 min and 4°C forever). After PCR, the DNA product

645 between 400-600bp was purified by gel extraction using DNA recovery kit (Zymo, #D4002) for deep  
646 sequencing.

647

#### 648 Step 5. HiCAR RNA libraries construction

649 The cytoplasmic and nuclei RNA fraction was combined. We added 20% SDS to the pooled RNA fraction  
650 to make the final concentration of SDS as 1%. The sample was mixed and incubated at 60°C for 30min.  
651 After incubation, we added 1/9 volume of 5M NaCl to make the final concentration of NaCl 500mM, the  
652 sample was incubated at 68°C for at least 1.5h for reverse crosslinking. Next, the RNA was purified by  
653 Phenol:Chloroform:Isoamyl Alcohol (25:24:1, v/v, SPECTRUM, #136112-00-0) extraction and ethanol  
654 precipitation. The sample was dissolved in 21ul 10mM Tris-HCl (pH8.0). Then the sample was treated  
655 by 0.5ul DNaseI at 37°C for 30min to remove DNA in solution. The RNA was purified by 2X volume of  
656 SPRI beads, dissolved RNA by 20ul 10mM Tris-HCl (pH8.0). Then take out 2.3ul RNA to make an  
657 RNAseq library using smartseq2 protocol<sup>19</sup>.

658

#### 659 HiCAR data processing

660 HiCAR datasets were processed following the distiller pipeline (<https://github.com/mirnylab/distiller-nf>).  
661 Briefly, reads were aligned to hg38 reference genome using bwa mem with flags -SP. Alignments were  
662 parsed, and paired end tags (PET) were generated using the pairtools  
663 (<https://github.com/mirnylab/pairtools>). PET with low mapping quality (MAPQ < 10) were filtered out. PET  
664 with the same coordinate on the genome or mapped to the same digestion fragment were removed.  
665 Uniquely mapped PETs were flipped as side 1 with the lower genomic coordinate and aggregated into  
666 contact matrices in the cooler format using the cooler tools<sup>54</sup> at delimited resolution (5kb, 10kb, 50kb,  
667 100kb, 250kb, 500Kb, 1Mb, 25MB, 50MB,100MB). The dense matrix data were extracted from cooler  
668 files and visualized using HiGlass<sup>55</sup>. The R1 and R2 reads signal around TSS or peaks were calculated  
669 with EnrichedHeatmap<sup>56</sup> before PET flipping.

670

#### 671 Hi-C matrix correlation SCC (stratum-adjusted correlation coefficient)

672 The similarity between different Hi-C datasets were measured by HiCRep<sup>26</sup>. The stratum adjusted  
673 correlation coefficient (SCC) is calculated on a per chromosome basis using HiCRep on 100 kb  
674 resolution data with a max distance of 5 Mb. The SCC was calculated as a weighted average of  
675 stratum-specific Pearson's correlation coefficients.

676

#### 677 Compartments A and B, directionality and Insulation score

678 Compartmentalization, directionality index and insulation score was assessed using cooltools  
679 (<https://github.com/mirnylab/cooltools>). Briefly, eigenvector decomposition was performed on cis contact  
680 maps at 100-kb resolution. The first three eigenvectors and eigenvalues were calculated, and the  
681 eigenvector associated with the largest absolute eigenvalue was chosen. An identically binned track of  
682 GC content was used to orient the eigenvectors. The insulation score and directionality Index were  
683 computed by cooltools using 'find\_insulating\_boundaries' and 'directionality' function, respectively.

684

### 685 **Contact probability decaying curve**

686 The curves of contact probability as a function of genomic separation were generated by pairsqc following  
687 the 4DN pipeline (<https://github.com/4dn-dcic/pairsqc>). Briefly, the genome is binned at log10 scale at  
688 interval of 0.1. For each bin, contact probability is computed as number of reads/number of possible  
689 reads/bin size.

690

### 691 **HiCAR RNA profile processing**

692 Reads were aligned to hg38 genome with Hisat2<sup>57</sup> using hg38 genome\_tran index obtained from Hisat2  
693 website (<http://daehwankimlab.github.io/hisat2/download/>). Raw reads for each gene were quantified  
694 using featureCounts<sup>58</sup>.

695

### 696 **HiCAR 1D open chromatin peak processing**

697 Unique mapped HiCAR DNA library R2 reads were extracted before PET flipping. R2 reads from long  
698 range (>20kb) and the inter-chromosome trans-PETs were combined and processed to be compatible  
699 as MACS2<sup>28</sup> input BED files. R2 reads from the short-range cis-PETs were discarded to avoid the  
700 potential bias due to proximity to CviQI enzyme cut sites<sup>59</sup>. . MACS2<sup>28</sup> was used to identify ATAC peaks  
701 following the ENCODE pipeline (<https://github.com/ENCODE-DCC/atac-seq-pipeline>) with the following  
702 parameters: "-q 0.01 --shift 150 --extsize -75--nomodel -B --SPMR --keep-dup all " .

703

### 704 **CTCF motif orientation analysis**

705 CTCF ChIP-seq peak list of H1 was downloaded from ENCODE (accession No. ENCFF821AQO) and  
706 searched for CTCF sequence motifs using gimme<sup>60</sup> and CTCF motif (MA0139.1) from the JASPAR  
707 database<sup>61</sup>. We then selected a subset of interactions with both ends containing either a single CTCF  
708 motif or multiple CTCF motifs in the same direction. The frequency of all possible directionality of CTCF  
709 motif pairs, convergent, tandem and divergent, are evaluated.

710

### 711 **Chromatin interaction calling**

712 For HiCAR, PLAC-seq and HiChIP datasets, we used the MAPS<sup>29</sup> to call the significant chromatin  
713 interactions. First, paired-end tags were extracted from cooler datasets at 5KB or 10Kb resolution using  
714 the “cooler dump” function with parameters: “-t pixels -H --join”. The interaction anchor bins were defined  
715 by the ATAC peaks or corresponding ChIP-seq peaks called using MACS2<sup>28</sup>. MAPS applied a positive  
716 Poisson regression-based approach to normalize systematic biases from restriction enzyme cut sites,  
717 GC content, sequence mappability, and 1D signal enrichment. We grouped interactions that were located  
718 within 15 kb of each other at both ends into clusters and classified all other interactions as singletons.  
719 We retained only interactions with 6 or more and normalized contact frequency (raw read  
720 counts/expected read counts)  $\geq 2$  and the significant interactions were defined by FDR  $< 0.01$  for  
721 clusters and FDR  $< 0.0001$  for singletons. For in situ Hi-C dataset, the .hic file is downloaded from 4DN  
722 data portal (accession No. 4DNES2M5JIGV) and HiCCUPS<sup>31</sup> is applied to call interactions at 10Kb  
723 resolution with the following parameters: “-r 10000 -k KR -f .1,.1 -p 4,2 -i 7,5 -t 0.02,1.5,1.75,2 -d  
724 20000,20000”.

725

#### 726 **Chromatin states enrichment analysis at chromatin interaction anchors**

727 Chromatin state calls using a 18-state model for H1 cell line were obtained from the Roadmap  
728 Epigenomics Mapping Consortium. To determine which pairs of chromatin states were enriched at  
729 interaction anchors at a statistically significant level, we examined the distribution of chromatin states at  
730 interaction anchors using HOMER and assess if a connection between the feature is over or under  
731 represented given the general enrichment for each chromatin states at the interaction anchors. We used  
732 the HOMER “annotateInteractions” function to obtain the p value and enrichment fold ratio for all pairs of  
733 chromatin states. The FDR adjusted p values were obtained using the p.adjust function from the R  
734 package, with option method=“fdr”.

735

#### 736 **Comparison between eQTL-TSS association and HiCAR interaction**

737 To test the enrichment for HiCAR identified interactions in significant eQTL-TSS association, we first  
738 obtain the eQTL-TSS associations in H1 hESC from the previous study<sup>32</sup>. To assess the significance of  
739 the enrichment, we generated a null distribution by creating a simulated interaction datasets by  
740 resampling the same number of interactions at random from distance-matched interactions (with 10,000  
741 repeats). The empirical P-value was computed by comparing the observed overlapping number with the  
742 null distribution.

743

#### 744 **Machine learning approaches to identify features associated with interaction activity**



745 We next collected epigenetic features from the public ENCODE consortium from H1 hESC lines. There  
746 are 75 ChIP-seq datasets collected for the H1 cell line, including 26 histone mark datasets and 49  
747 transcription factors (redundant datasets from different labs are removed). Average bigWig signals on  
748 each 5kb anchor are computed using the bigWigAverageOverBed command from UCSC. We used  
749 regression-based machine learning. For regression, we used a sigmoid function to scale the chromatin  
750 interaction score into a [0,1] range:

751

752

$$f(x) = \frac{1}{1 + e^{-c1(x-c2)}}$$

753

754 We set  $c1 = 0.05$  and  $c2 = 20$  empirically, such that the bins with stronger interactions have a value  
755 closer to 1 after sigmoid conversion. We used the regression methods in the scikit-learn Python  
756 package<sup>50</sup> for regression analysis, including linear regression, decision tree, xgbboost, random forest  
757 and linear-kernel support vector machine (SVM). The XGBoost Python package<sup>51</sup> was used for  
758 XGBoost regression analysis.

759

### 760 **Gene Ontology enrichment analysis**

761 We used Clusterprofile<sup>62</sup> to examine whether particular gene sets were enriched in certain gene lists. GO  
762 categories with “BH” adjusted p value  $< 0.05$  were considered as significant.

763 **Reference**

- 764 1. Gerstein, M. B. *et al.* Architecture of the human regulatory network derived from ENCODE data.  
765 *Nature* **489**, 91–100 (2012).
- 766 2. Roadmap Epigenomics Consortium *et al.* Integrative analysis of 111 reference human  
767 epigenomes. *Nature* **518**, 317–330 (2015).
- 768 3. Diao, Y. *et al.* A tiling-deletion-based genetic screen for cis-regulatory element identification in  
769 mammalian cells. *Nat. Methods* **14**, 629–635 (2017).
- 770 4. Buenrostro, J. D., Giresi, P. G., Zaba, L. C., Chang, H. Y. & Greenleaf, W. J. Transposition of  
771 native chromatin for fast and sensitive epigenomic profiling of open chromatin, DNA-binding  
772 proteins and nucleosome position. *Nat. Methods* **10**, 1213–1218 (2013).
- 773 5. Song, L. & Crawford, G. E. DNase-seq: a high-resolution technique for mapping active gene  
774 regulatory elements across the genome from mammalian cells. *Cold Spring Harb. Protoc.* **2010**,  
775 db.prot5384 (2010).
- 776 6. Simon, J. M., Giresi, P. G., Davis, I. J. & Lieb, J. D. Using formaldehyde-assisted isolation of  
777 regulatory elements (FAIRE) to isolate active regulatory DNA. *Nat. Protoc.* **7**, 256–267 (2012).
- 778 7. Lieberman-Aiden, E. *et al.* Comprehensive mapping of long-range interactions reveals folding  
779 principles of the human genome. *Science* **326**, 289–293 (2009).
- 780 8. Dixon, J. R. *et al.* Topological domains in mammalian genomes identified by analysis of chromatin  
781 interactions. *Nature* **485**, 376–380 (2012).
- 782 9. Rao, S. S. P. *et al.* A 3D map of the human genome at kilobase resolution reveals principles of  
783 chromatin looping. *Cell* **159**, 1665–1680 (2014).
- 784 10. Bonev, B. *et al.* Multiscale 3D Genome Rewiring during Mouse Neural Development. *Cell* **171**,  
785 557–572.e24 (2017).
- 786 11. Fullwood, M. J. *et al.* An oestrogen-receptor-alpha-bound human chromatin interactome. *Nature*  
787 **462**, 58–64 (2009).
- 788 12. Mumbach, M. R. *et al.* HiChIP: efficient and sensitive analysis of protein-directed genome  
789 architecture. *Nat. Methods* **13**, 919–922 (2016).
- 790 13. Fang, R. *et al.* Mapping of long-range chromatin interactions by proximity ligation-assisted ChIP-  
791 seq. *Cell Res.* **26**, 1345–1348 (2016).
- 792 14. Davies, J. O. J. *et al.* Multiplexed analysis of chromosome conformation at vastly improved  
793 sensitivity. *Nat. Methods* **13**, 74–80 (2016).
- 794 15. Lai, B. *et al.* Trac-looping measures genome structure and chromatin accessibility. *Nat. Methods*  
795 **15**, 741–747 (2018).

- 796 16. Li, T., Jia, L., Cao, Y., Chen, Q. & Li, C. OCEAN-C: mapping hubs of open chromatin interactions  
797 across the genome reveals gene regulatory networks. *Genome Biol.* **19**, 54 (2018).
- 798 17. ENCODE Project Consortium. An integrated encyclopedia of DNA elements in the human genome.  
799 *Nature* **489**, 57–74 (2012).
- 800 18. Reznikoff, W. S. Tn5 as a model for understanding DNA transposition. *Mol. Microbiol.* **47**, 1199–  
801 1206 (2003).
- 802 19. Picelli, S. *et al.* Full-length RNA-seq from single cells using Smart-seq2. *Nat. Protoc.* **9**, 171–181  
803 (2014).
- 804 20. Krietenstein, N. *et al.* Ultrastructural Details of Mammalian Chromosome Architecture. *Mol. Cell* **78**,  
805 554–565.e7 (2020).
- 806 21. Corces, M. R. *et al.* An improved ATAC-seq protocol reduces background and enables  
807 interrogation of frozen tissues. *Nat. Methods* **14**, 959–962 (2017).
- 808 22. Ma, W. *et al.* Fine-scale chromatin interaction maps reveal the cis-regulatory landscape of human  
809 lincRNA genes. *Nat. Methods* **12**, 71–78 (2015).
- 810 23. Heintzman, N. D. *et al.* Distinct and predictive chromatin signatures of transcriptional promoters  
811 and enhancers in the human genome. *Nat. Genet.* **39**, 311–318 (2007).
- 812 24. Klemm, S. L., Shipony, Z. & Greenleaf, W. J. Chromatin accessibility and the regulatory  
813 epigenome. *Nat. Rev. Genet.* **20**, 207–220 (2019).
- 814 25. Dekker, J. *et al.* The 4D nucleome project. *Nature* **549**, 219–226 (2017).
- 815 26. Yang, T. *et al.* HiCRep: assessing the reproducibility of Hi-C data using a stratum-adjusted  
816 correlation coefficient. *Genome Res.* **27**, 1939–1949 (2017).
- 817 27. Davis, C. A. *et al.* The Encyclopedia of DNA elements (ENCODE): data portal update. *Nucleic  
818 Acids Res.* **46**, D794–D801 (2018).
- 819 28. Zhang, Y. *et al.* Model-based analysis of ChIP-Seq (MACS). *Genome Biol.* **9**, R137 (2008).
- 820 29. Juric, I. *et al.* MAPS: Model-based analysis of long-range chromatin interactions from PLAC-seq  
821 and HiChIP experiments. *PLoS Comput. Biol.* **15**, e1006982 (2019).
- 822 30. Lyu, X., Rowley, M. J. & Corces, V. G. Architectural Proteins and Pluripotency Factors Cooperate  
823 to Orchestrate the Transcriptional Response of hESCs to Temperature Stress. *Mol. Cell* **71**, 940–  
824 955.e7 (2018).
- 825 31. Durand, N. C. *et al.* Juicer Provides a One-Click System for Analyzing Loop-Resolution Hi-C  
826 Experiments. *Cell Syst* **3**, 95–98 (2016).
- 827 32. DeBoever, C. *et al.* Large-Scale Profiling Reveals the Influence of Genetic Variation on Gene  
828 Expression in Human Induced Pluripotent Stem Cells. *Cell Stem Cell* **20**, 533–546.e7 (2017).
- 829 33. Ernst, J. & Kellis, M. ChromHMM: automating chromatin-state discovery and characterization. *Nat.*

- 830 *Methods* **9**, 215–216 (2012).
- 831 34. Ernst, J. & Kellis, M. Chromatin-state discovery and genome annotation with ChromHMM. *Nat.*  
832 *Protoc.* **12**, 2478–2492 (2017).
- 833 35. Schmitt, A. D. *et al.* A Compendium of Chromatin Contact Maps Reveals Spatially Active Regions  
834 in the Human Genome. *Cell Rep.* **17**, 2042–2059 (2016).
- 835 36. Song, M. *et al.* Cell-type-specific 3D epigenomes in the developing human cortex. *Nature* (2020)  
836 doi:10.1038/s41586-020-2825-4.
- 837 37. Zheng, R. *et al.* Cistrome Data Browser: expanded datasets and new tools for gene regulatory  
838 analysis. *Nucleic Acids Res.* **47**, D729–D735 (2019).
- 839 38. Kraft, K. *et al.* Polycomb-mediated Genome Architecture Enables Long-range Spreading of H3K27  
840 methylation. *bioRxiv* (2020).
- 841 39. Cai, Y. *et al.* H3K27me3-rich genomic regions can function as silencers to repress gene  
842 expression via chromatin interactions. doi:10.1101/684712.
- 843 40. van Steensel, B. & Furlong, E. E. M. The role of transcription in shaping the spatial organization of  
844 the genome. *Nat. Rev. Mol. Cell Biol.* **20**, 327–337 (2019).
- 845 41. Abboud, N. *et al.* A cohesin-OCT4 complex mediates Sox enhancers to prime an early embryonic  
846 lineage. *Nat. Commun.* **6**, 6749 (2015).
- 847 42. Donohoe, M. E., Silva, S. S., Pinter, S. F., Xu, N. & Lee, J. T. The pluripotency factor Oct4  
848 interacts with Ctf and also controls X-chromosome pairing and counting. *Nature* **460**, 128–132  
849 (2009).
- 850 43. McLaughlin, K. *et al.* DNA Methylation Directs Polycomb-Dependent 3D Genome Re-organization  
851 in Naive Pluripotency. *Cell Rep.* **29**, 1974–1985.e6 (2019).
- 852 44. Boyle, S. *et al.* A central role for canonical PRC1 in shaping the 3D nuclear landscape. *Genes Dev.*  
853 **34**, 931–949 (2020).
- 854 45. Yan, J. *et al.* Histone H3 lysine 4 monomethylation modulates long-range chromatin interactions at  
855 enhancers. *Cell Res.* **28**, 387 (2018).
- 856 46. Yu, M. & Ren, B. The Three-Dimensional Organization of Mammalian Genomes. *Annu. Rev. Cell*  
857 *Dev. Biol.* **33**, 265–289 (2017).
- 858 47. Tang, Z. *et al.* CTCF-Mediated Human 3D Genome Architecture Reveals Chromatin Topology for  
859 Transcription. *Cell* **163**, 1611–1627 (2015).
- 860 48. Rowley, M. J. & Corces, V. G. Organizational principles of 3D genome architecture. *Nat. Rev.*  
861 *Genet.* **19**, 789–800 (2018).
- 862 49. Frieze, S., O’Geen, H., Blahnik, K. R., Jin, V. X. & Farnham, P. J. ZNF274 recruits the histone  
863 methyltransferase SETDB1 to the 3’ ends of ZNF genes. *PLoS One* **5**, e15082 (2010).

- 864 50. Pedregosa, F. *et al.* Scikit-learn: Machine learning in Python. *the Journal of machine Learning*  
865 *research* **12**, 2825–2830 (2011).
- 866 51. Chen, T. & Guestrin, C. XGBoost: A Scalable Tree Boosting System. *arXiv [cs.LG]* (2016).
- 867 52. Ngan, C. Y. *et al.* Chromatin interaction analyses elucidate the roles of PRC2-bound silencers in  
868 mouse development. *Nat. Genet.* **52**, 264–272 (2020).
- 869 53. Dekker, J. The three ‘C’ s of chromosome conformation capture: controls, controls, controls. *Nat.*  
870 *Methods* **3**, 17–21 (2006).
- 871 54. Abdennur, N. & Mirny, L. A. Cooler: scalable storage for Hi-C data and other genomically labeled  
872 arrays. *Bioinformatics* **36**, 311–316 (2020).
- 873 55. Kerpedjiev, P. *et al.* HiGlass: web-based visual exploration and analysis of genome interaction  
874 maps. *Genome Biol.* **19**, 125 (2018).
- 875 56. Gu, Z., Eils, R., Schlesner, M. & Ishaque, N. EnrichedHeatmap: an R/Bioconductor package for  
876 comprehensive visualization of genomic signal associations. *BMC Genomics* **19**, 234 (2018).
- 877 57. Kim, D., Paggi, J. M., Park, C., Bennett, C. & Salzberg, S. L. Graph-based genome alignment and  
878 genotyping with HISAT2 and HISAT-genotype. *Nat. Biotechnol.* **37**, 907–915 (2019).
- 879 58. Liao, Y., Smyth, G. K. & Shi, W. featureCounts: an efficient general purpose program for assigning  
880 sequence reads to genomic features. *Bioinformatics* **30**, 923–930 (2014).
- 881 59. Lareau, C. A. & Aryee, M. J. hichipper: a preprocessing pipeline for calling DNA loops from HiChIP  
882 data. *Nature methods* vol. 15 155–156 (2018).
- 883 60. van Heeringen, S. J. & Veenstra, G. J. GimmeMotifs: a de novo motif prediction pipeline for ChIP-  
884 sequencing experiments. *Bioinformatics* **27**, 270–271 (2011).
- 885 61. Fornes, O. *et al.* JASPAR 2020: update of the open-access database of transcription factor binding  
886 profiles. *Nucleic Acids Res.* **48**, D87–D92 (2020).
- 887 62. Yu, G., Wang, L. G., Han, Y. & He, Q. Y. clusterProfiler: an R package for comparing biological  
888 themes among gene clusters. *OMICS* **16**, 284–287 (2012).

889

890 **Supplementary Information**

891 **Including Supplementary figures 1-5 with figure legends**

892 **The title of Supplementary Table 1-10**

893

894 **Supplementary Figure 1. HiCAR library enrichment analysis and data quality control.**

895 **(A)** The aggregated signals of HiCAR R2 reads (red), R1 reads (blue), and in situ Hi-C (black) reads  
896 within +/- 3kb window of indicated peak regions of H1 hESC. The HiCAR R1, R2 and Hi-C reads are  
897 normalized against sequence depth (counts per million). Signal coverage (y-axis) was calculated as  
898 sequencing read depth per base within +/- 2kb window of peak center. **(B)** The aggregated signals of  
899 HiCAR R2 reads (red), R1 reads (blue), H3K4me1 HiChIP (purple), H3K4me3 PLAC-seq (black), and  
900 DNase Hi-C (brown) within +/- 2kb window centered at TSS. Enrichment fold was calculated by  
901 comparing the reads coverage on peak center against the reads coverage at +/- 2kb region. **(C)** We used  
902 HiCrep to compute the similarity of chromatin contact matrices including three HiCAR biological replicates  
903 and 4DN in situ Hi-C data. The number is the SCC value computed from HiCrep. **(D)** Scatter plots with  
904 PCC of the reads counts from two biological replicates of HiCAR RNA-seq library (left) and HiCAR DNA  
905 library R2 reads (right panel). **(E)** The HiCAR 1D open chromatin peaks are called by MACS2. The peaks  
906 are ranked along x-axis based on their MACS P value (-log<sub>10</sub>). At a given P value, the y-axis indicates  
907 the proportion of the HiCAR 1D peaks that can be validated by H1 hESC ATAC-seq peaks.

908

909 **Supplementary Figure 2. Gene Ontology terms associated with H3K27ac- and H3K27m3-anchored**  
910 **HiCAR interactions**

911 We selected the genes whose promoters are overlapped with HiCAR interaction anchors for Gene  
912 Ontology enrichment analysis. **(A)** GO terms enriched on H3K27ac-anchored interactions and **(B)** GO  
913 terms enriched on H3K27me3-anchored interactions.

914

915 **Supplementary Figure 3. The spatial interactive activity of cis-regulatory sequence shows very**  
916 **weak correlation with its transcriptional activity, enhancer activity, or chromatin accessibility.**

917 **(A-C)** Scatter plots showing the cumulative interactive score (sum of -log<sub>10</sub>FDR) of HiCAR interaction  
918 anchor on y-axis, against x-axis showing: **(A)** mRNA level (log<sub>2</sub> FPKM) of the genes expressed from the  
919 promoters overlapped with anchors; **(B)** H3K27ac ChIP-seq signal of anchors indicating their enhancer  
920 activity mark; and **(C)** chromatin accessibility of anchors measured by ATAC-seq signal. PCC: Pearson  
921 correlation coefficient. **(D)** Histogram and **(E)** boxplot showing the distribution of mRNA levels expressed  
922 from the gene promoters overlap with HiCAR interaction hotspots or regular anchors. The P value (0.96)  
923 was calculated by Wilcoxon rank-sum test in (D).

924 **Supplementary Figure 4. Prediction of histone mark and TF binding important for cRE's spatial**  
925 **interactive activity using machine learning.**

926 **(A)** The top ranked 15 features predicted by five machine learning algorithms, including Decision tree,  
927 Linear regression, XGBoost, Random forest, and Linear-kernel support vector machine (Linear SVM).

928 **(B)** Mean absolute error and Mean squared error of each regression method.

929

930 **Supplementary Figure 5. Identify long-range cis-regulatory chromatin interaction in GM12878**  
931 **and mESCs with HiCAR.**

932 **(A)** Genome browser screenshot showing CTCF ChIP-Seq, DNase hypersensitive (DHS), and the  
933 HiCCUPS loops and MAPS interactions identified by HiCAR, in situ Hi-C and SMC1A HiChIP in GM12878

934 cells. **(B)** Genome browser screenshot showing H3K27ac ChIP-seq and the HiCCUPS loops and MAPS  
935 interactions identified by HiCAR, in situ Hi-C, CTCF PLAC-seq, H3K4me3 PLAC-seq in mESC cells. **(C,**

936 **D)** The chromatin loops and interactions with at least one anchor overlapping with ATAC-seq peaks are  
937 defined as “testable” loops/interactions. We calculated the proportion of the “testable” loops/interactions

938 that can be discovered by HiCAR interaction to estimate the sensitivity of HiCAR interaction calling in  
939 GM12878 and mESCs. **(C)** In GM12878 cells, HiCAR discovered 79% and 62% of “testable”

940 loops/interactions identified by in situ Hi-C and SMC1A HiChIP, respectively. **(D)** In mESC, HiCAR  
941 discovered 74%, 70% and 85% of “testable” loops and interactions identified by in situ Hi-C, H3K4me3

942 PLAC-seq and CTCF PLAC-seq, respectively. **(E, F)** We examined the motif orientation of CTCF on the  
943 anchors of chromatin loop and interactions. The length of the bars indicating the proportion of chromatin

944 loops/interactions harbor convergent, tandem and divergent CTCF motif on their anchors. **(E)** In  
945 GM12878 cells, 72.4%, 75.8%, and 89.8% HiCAR interactions, SMC1A HiChIP interactions, and in situ

946 Hi-C loops harbor convergent CTCF motif on their anchors. **(F)** In mESC, 63.7%, 62.7%, and 55.7% of  
947 HiCAR interactions, CTCF PLAC-seq interactions, and H3K4me3 PLAC-seq interactions harbor

948 convergent CTCF motif on their anchors.

949

950

951 **Supplementary Table 1**

952 The list of public datasets used in this study.

953

954 **Supplementary Table 2**

955 Oligo and DNA sequences used in this study.

956

957 **Supplementary Table 3**

958 Summary of all a total of seven HiCAR DNA libraries generated with H1 hESC, GM12878 and mESCs.

959

960 **Supplementary Table 4**

961 The full list of chromatin loops and interactions in H1 identified by HICCUPS and MAPS from *in situ* HiC,  
962 HiChIP, PLAC-seq and HiCAR data.

963

964 **Supplementary Table 5**

965 Statistical analysis of pairwise chromHMM states interaction frequency.

966

967 **Supplementary Table 6**

968 HiCAR anchor cumulative interactive score and GO term enrichment on interaction hotspots.

969

970 **Supplementary Table 7**

971 Statistical analysis of ChIP-seq signals enrichment on HiCAR interaction hotspots versus regular  
972 anchors.

973

974 **Supplementary Table 8**

975 The full list of top-ranked important features predicted by five regression models.

976

977 **Supplementary Table 9**

978 The full list of mESC HiCCUPPS loops and MAPS interactions identified by *in situ* Hi-C, PLAC-seq and  
979 HiCAR datasets.

980

981 **Supplementary Table 10**

982 The full list of GM12878 HiCCUPPS loops and MAPS interactions identified by *in situ* Hi-C, HiChIP, and  
983 HiCAR datasets.



**Figure 2****A**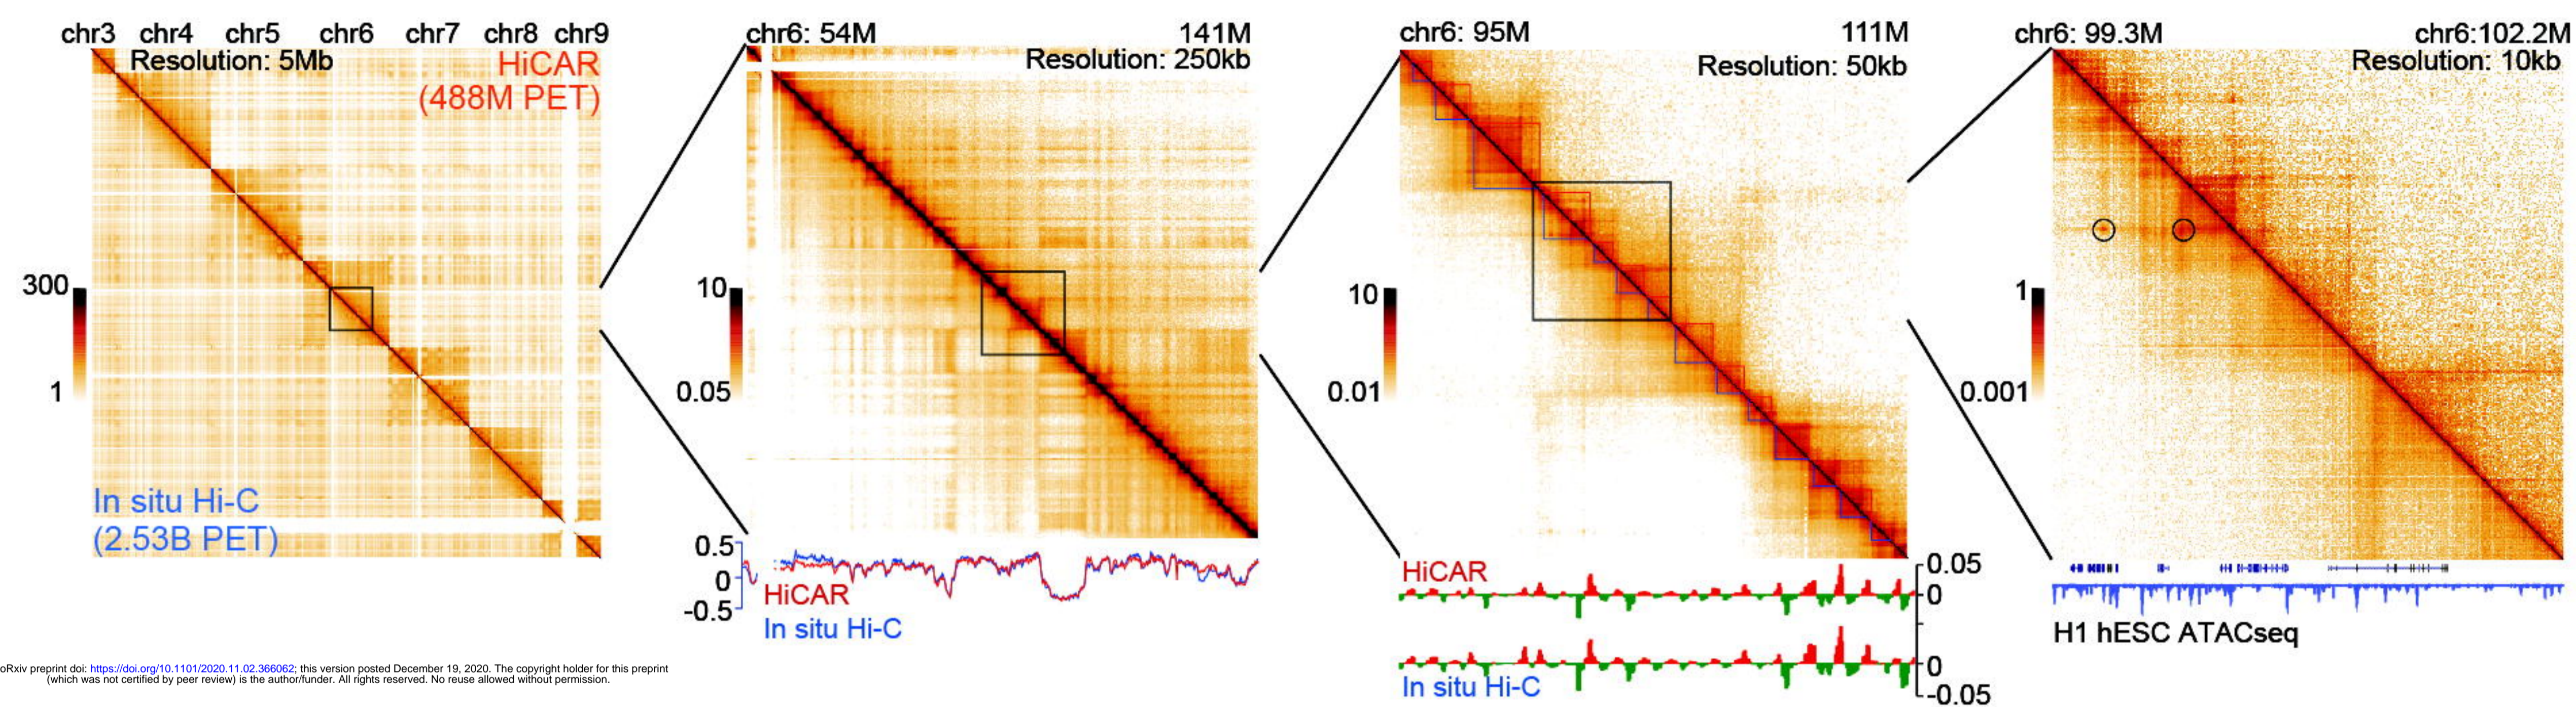

bioRxiv preprint doi: <https://doi.org/10.1101/2020.11.02.366062>; this version posted December 19, 2020. The copyright holder for this preprint (which was not certified by peer review) is the author/funder. All rights reserved. No reuse allowed without permission.

**B**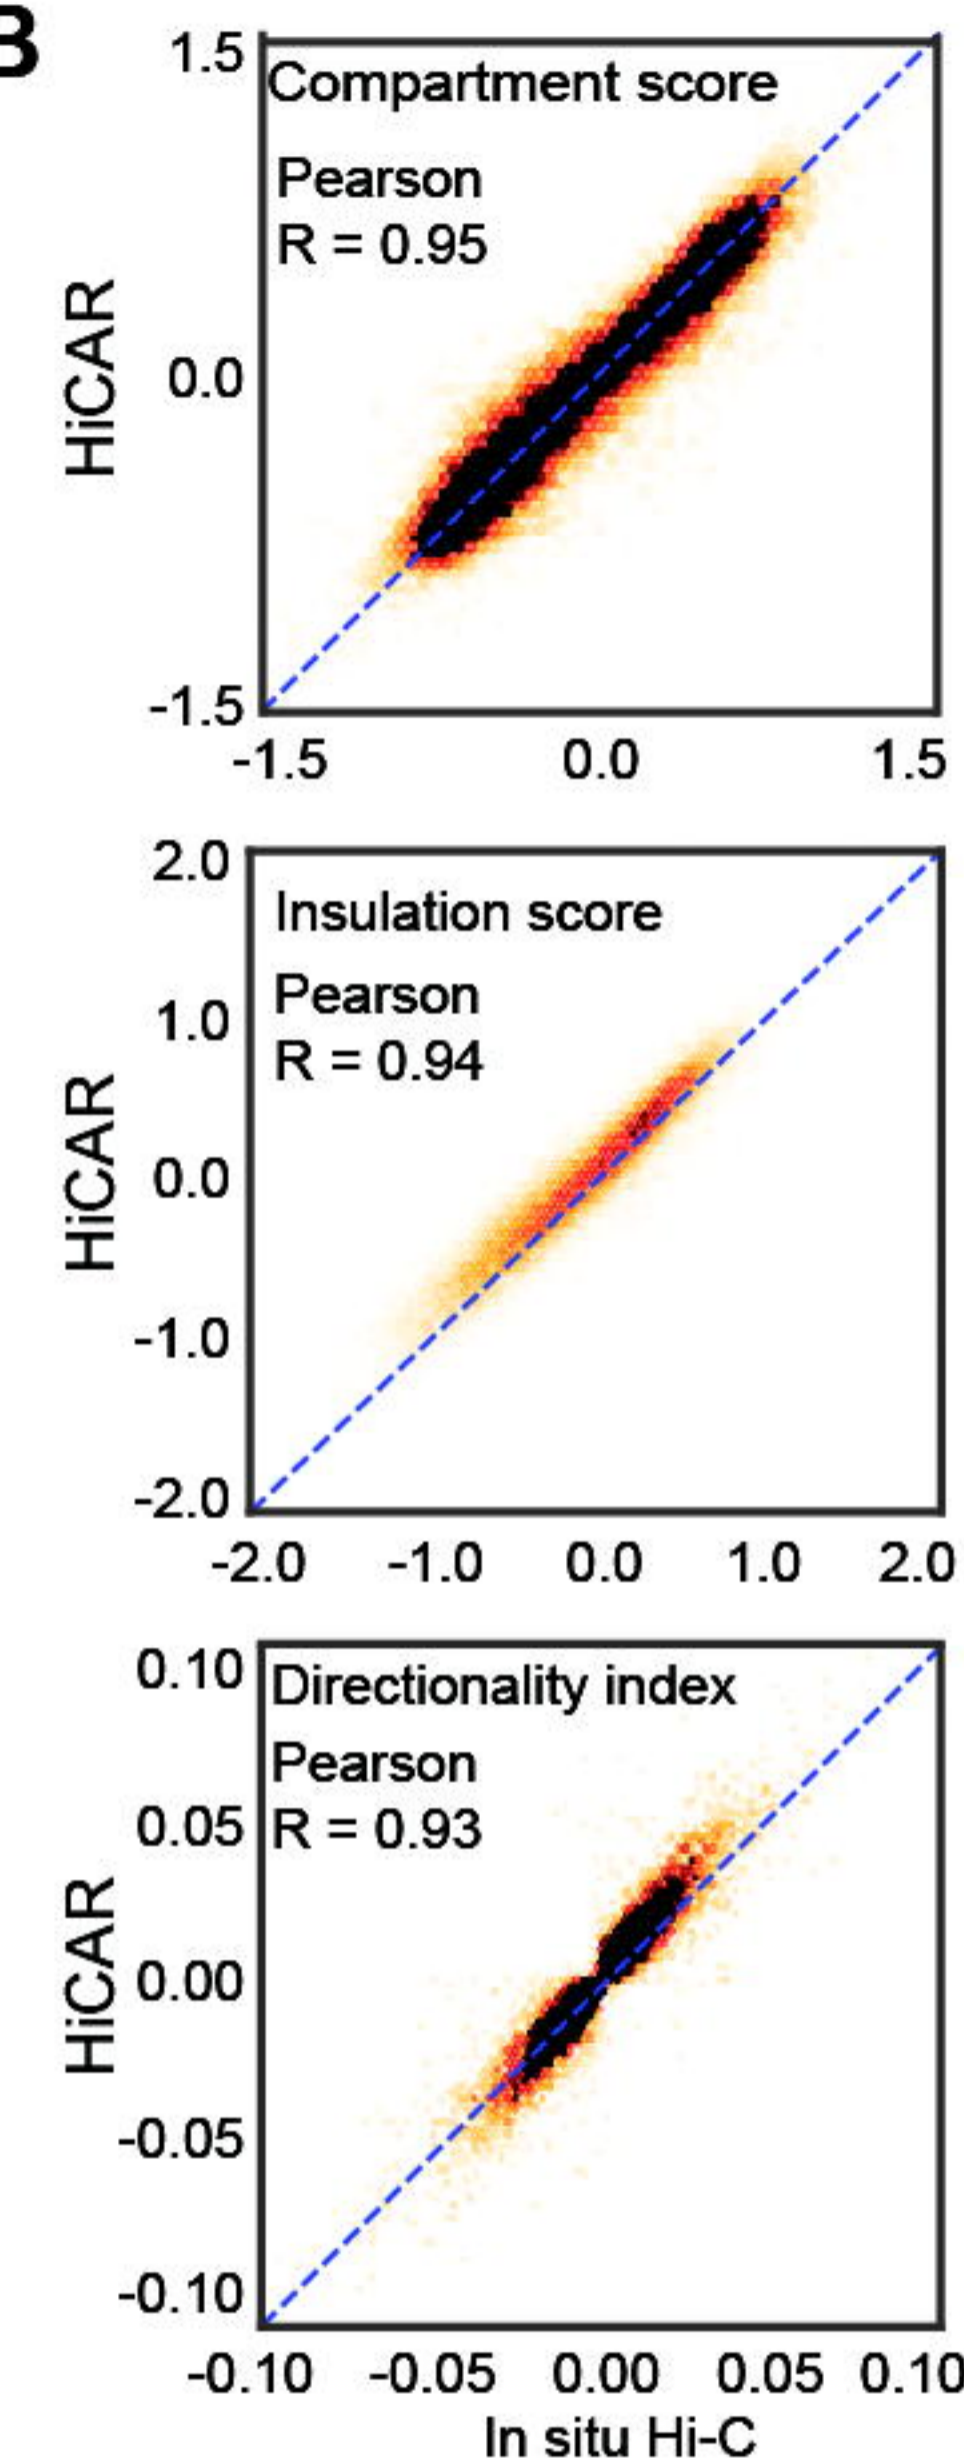**C**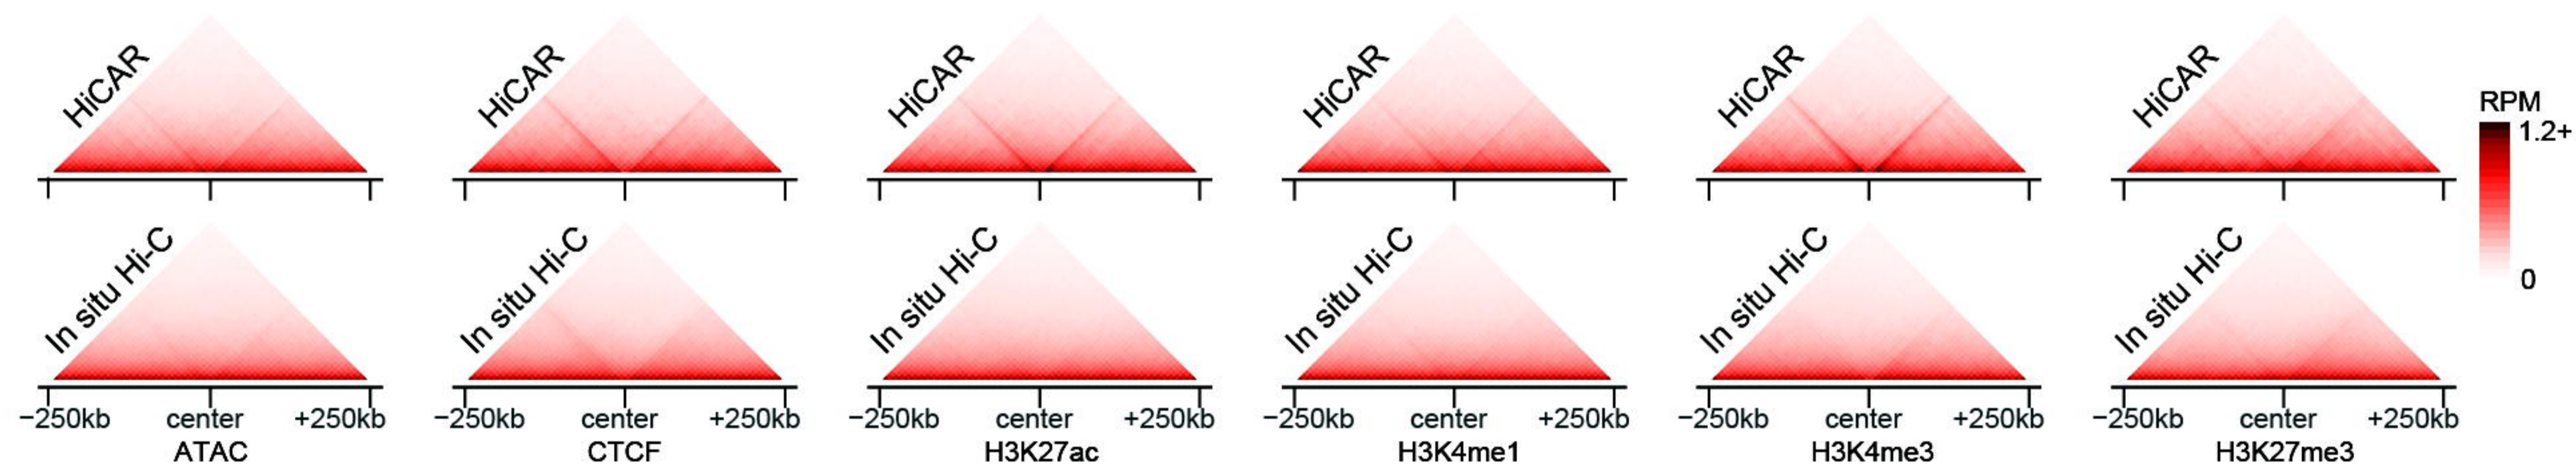**D**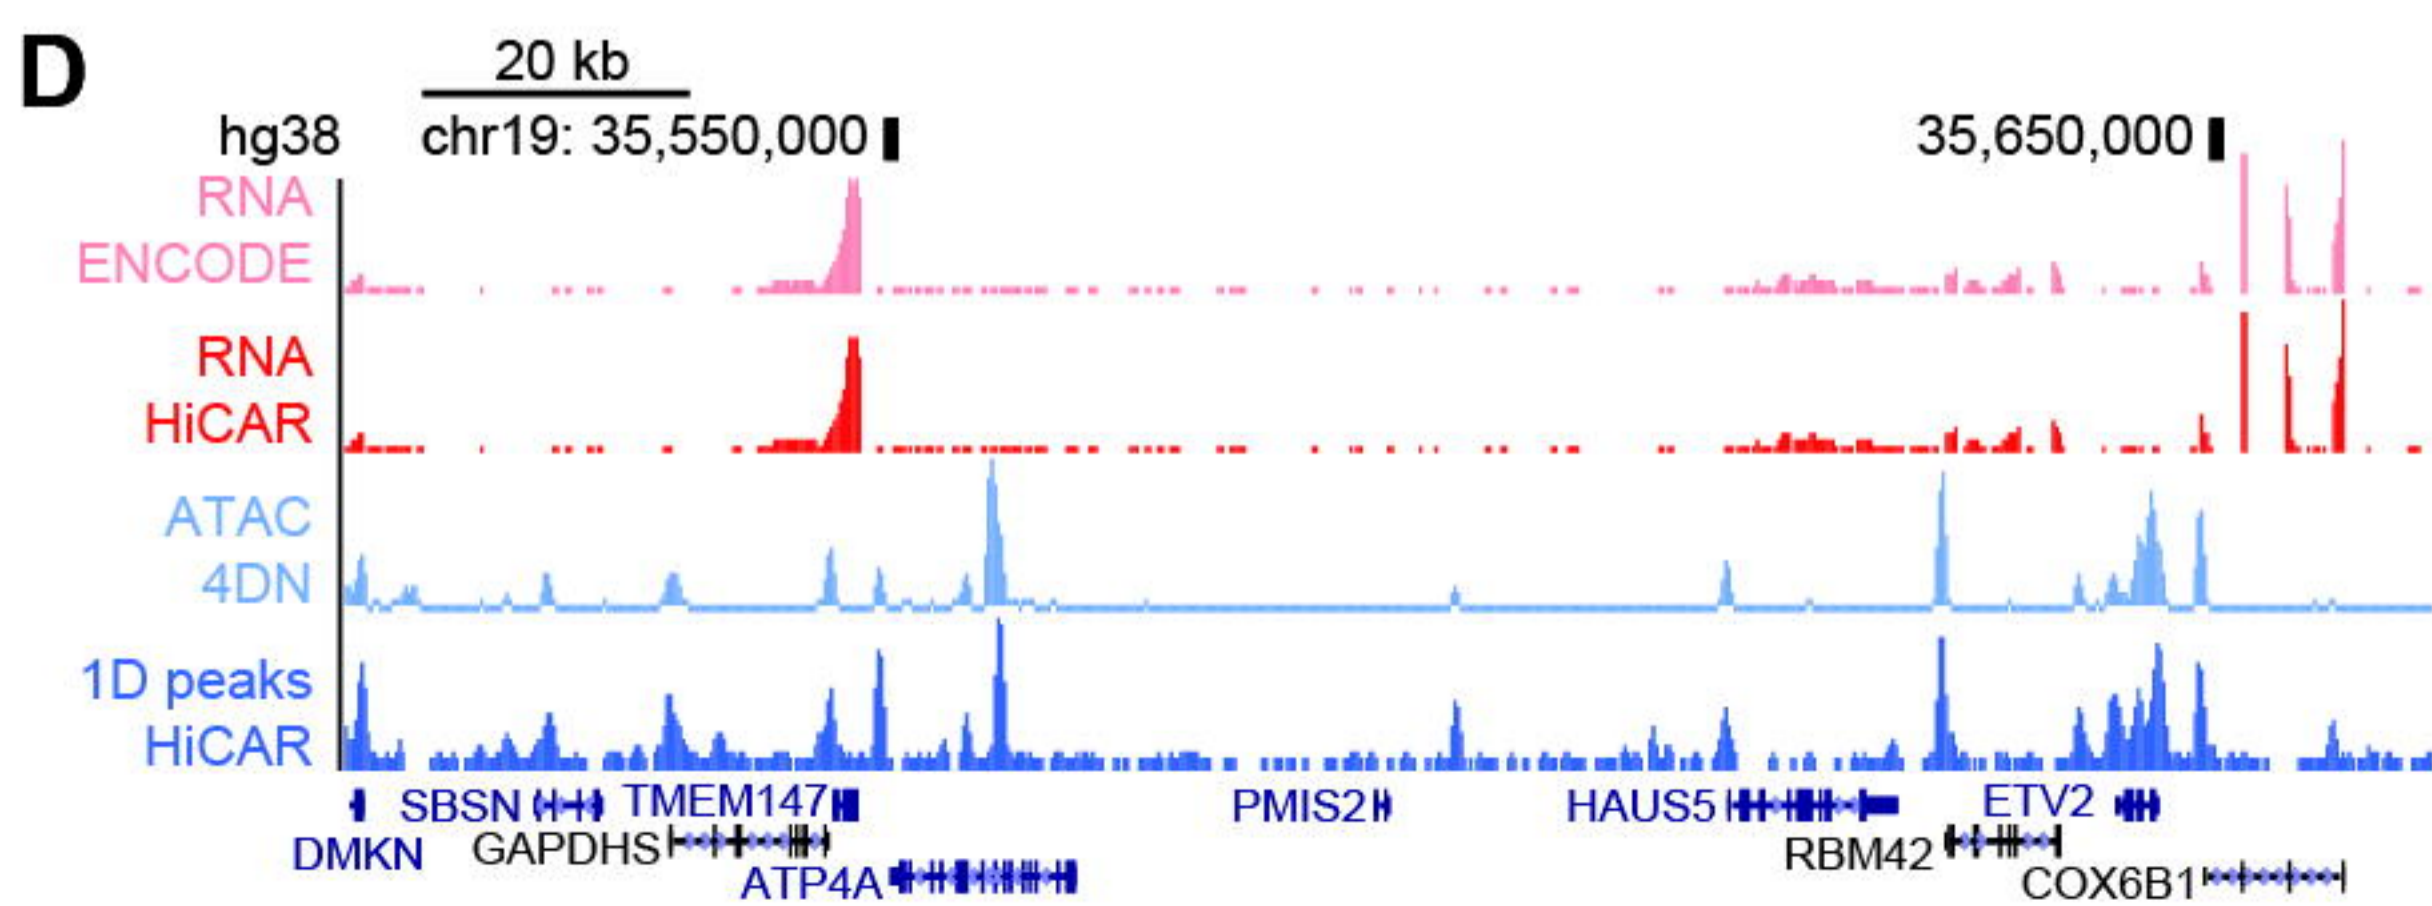**E**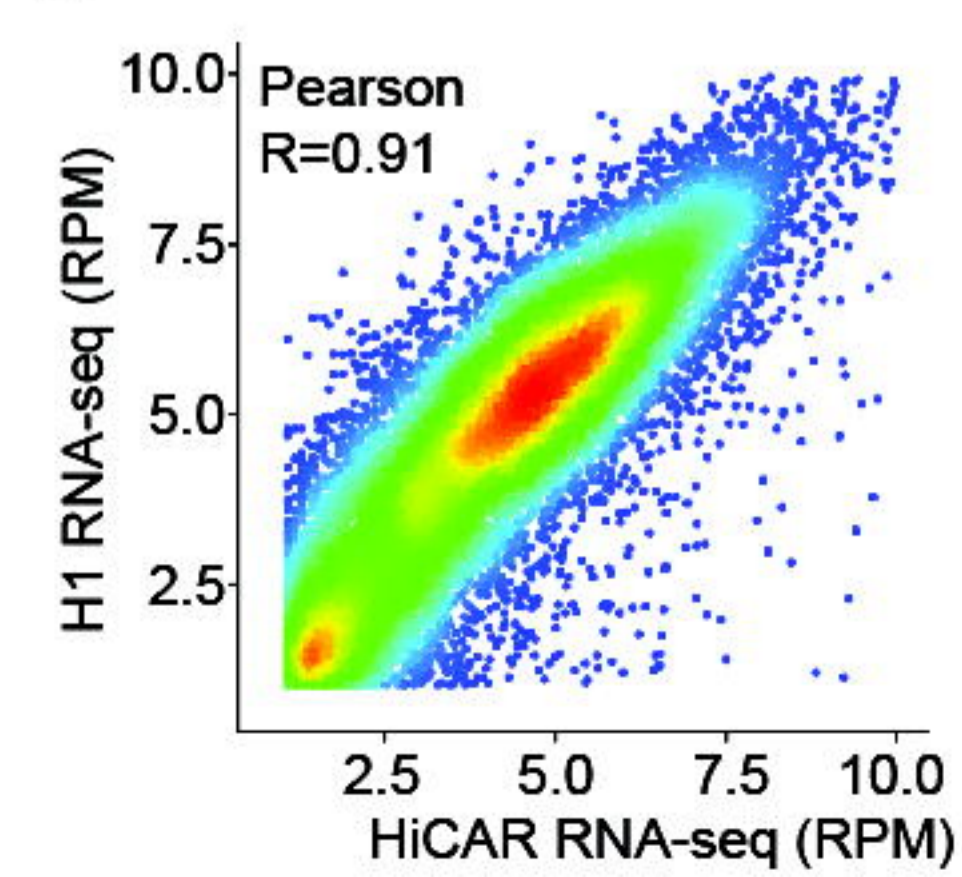**F**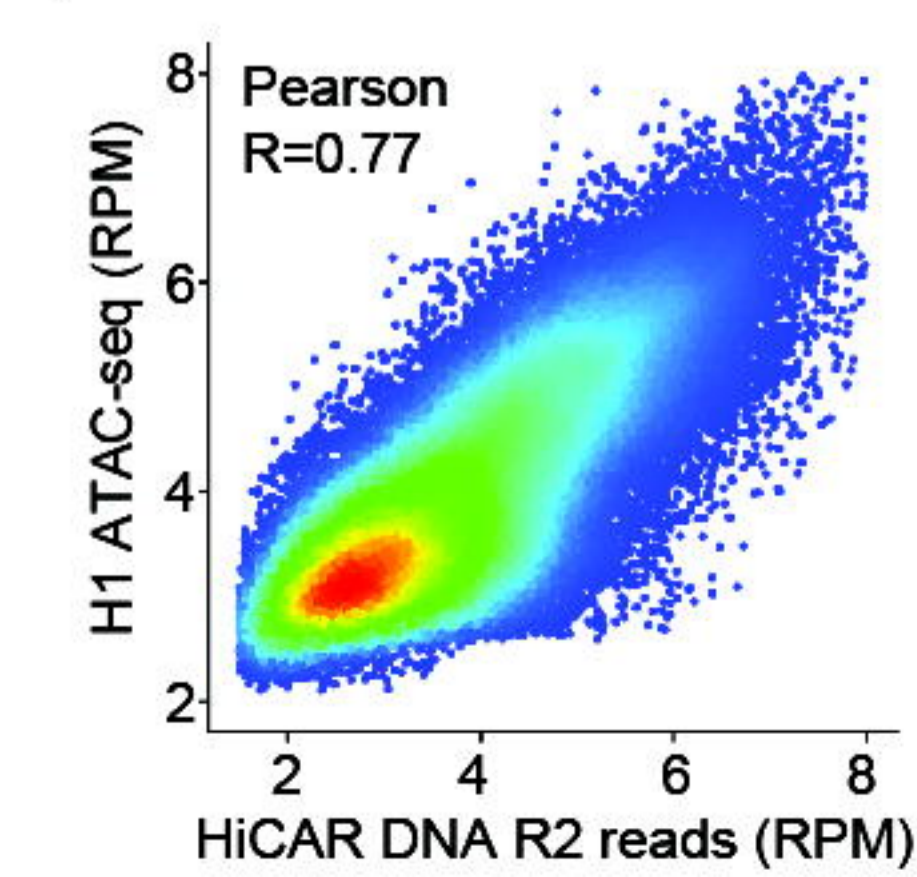**G**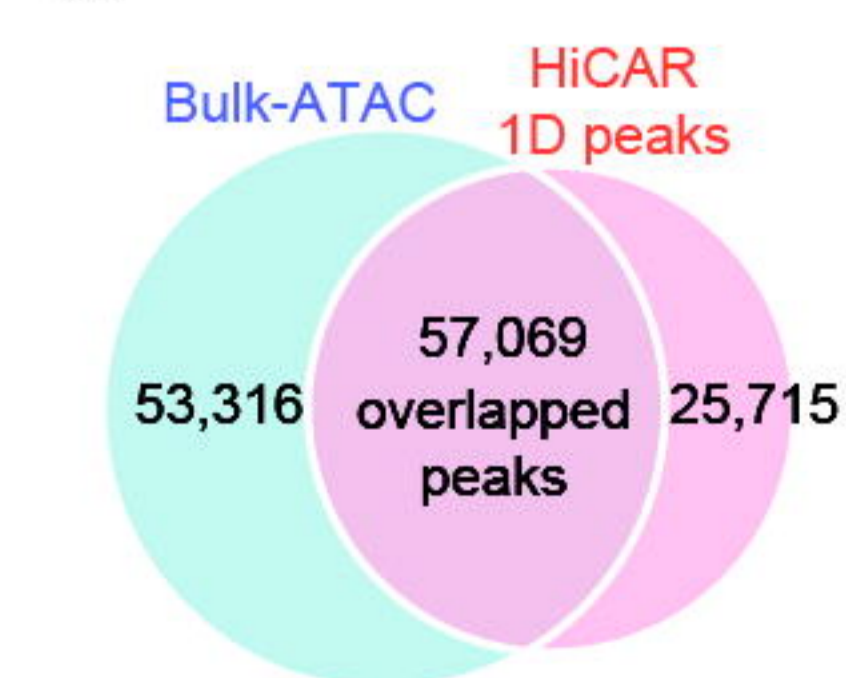**H**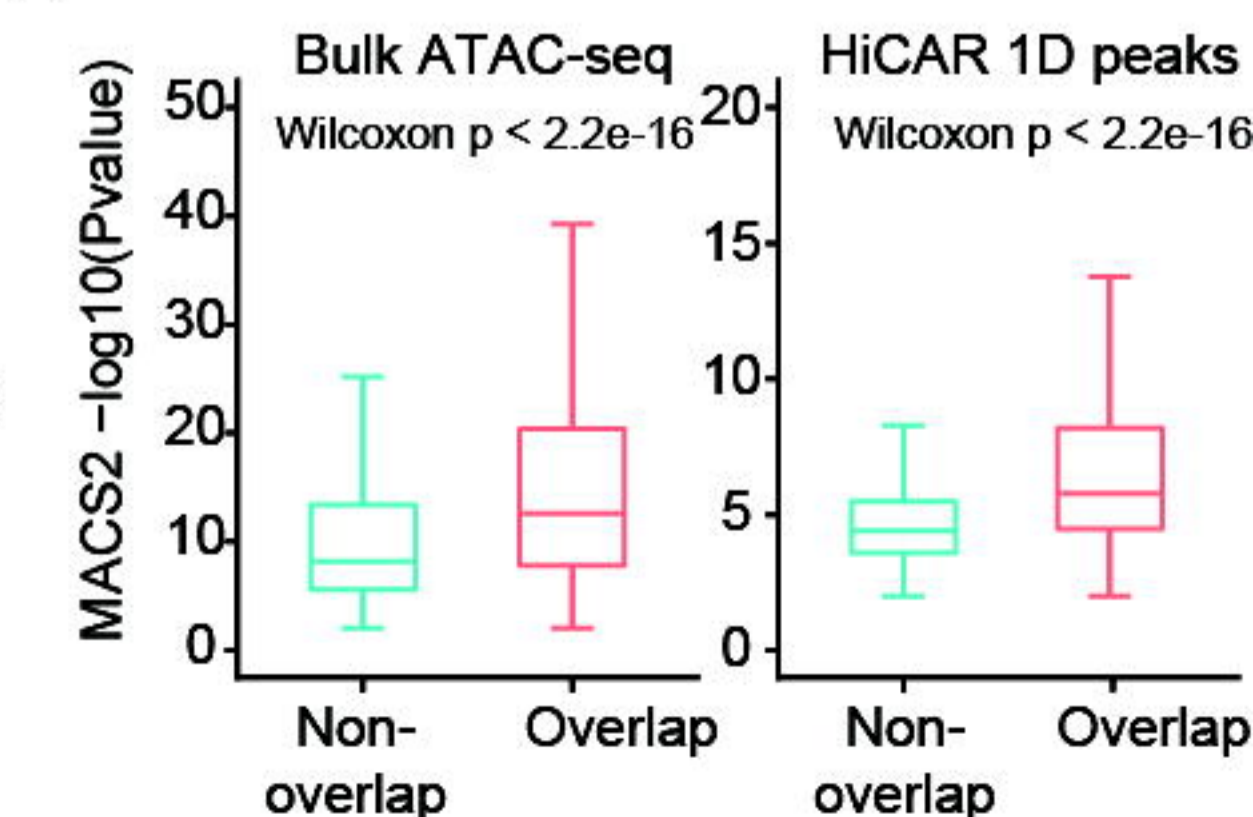

# Figure 3

**A**

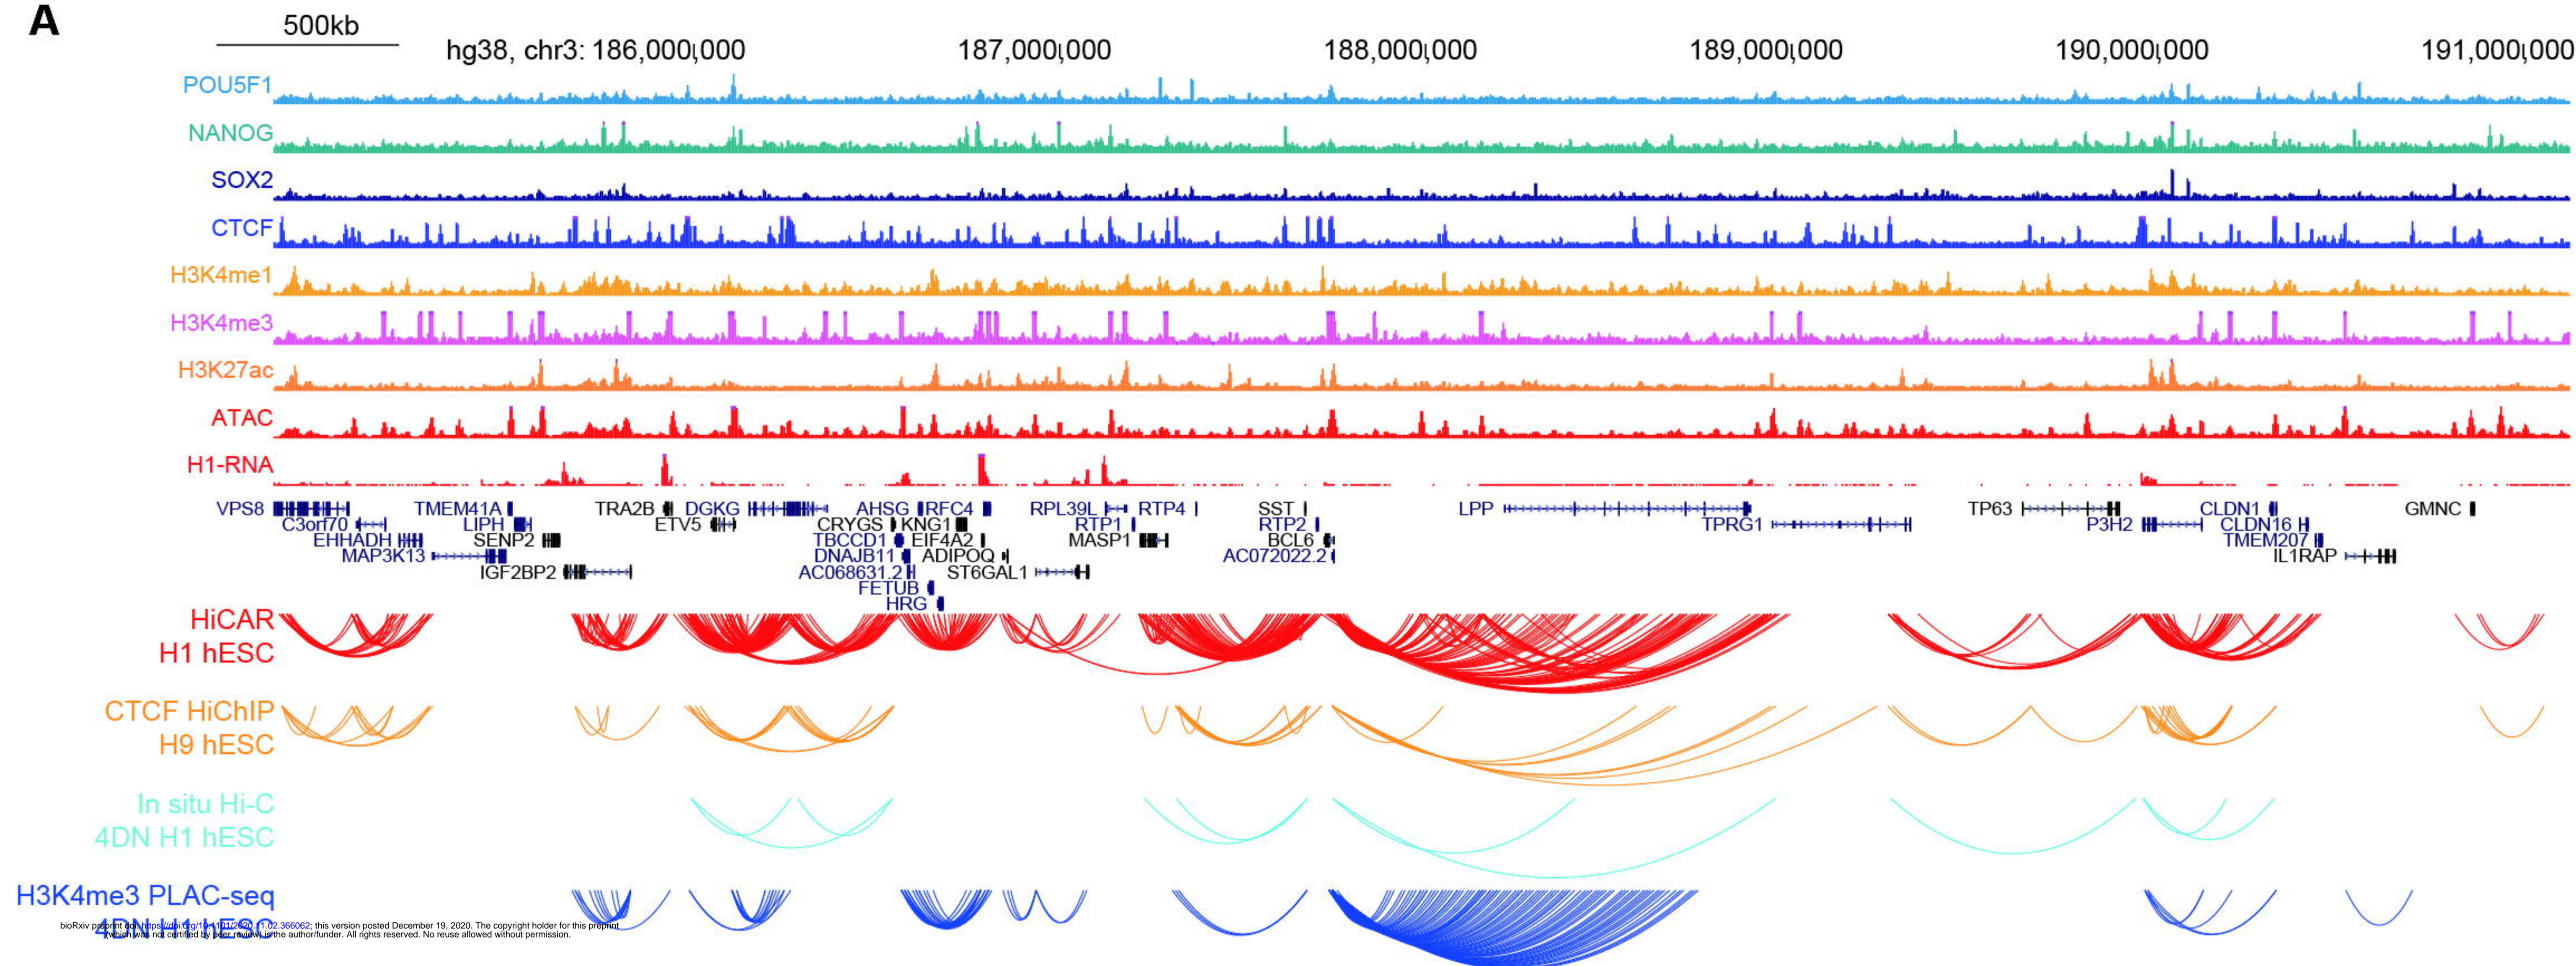

**B**

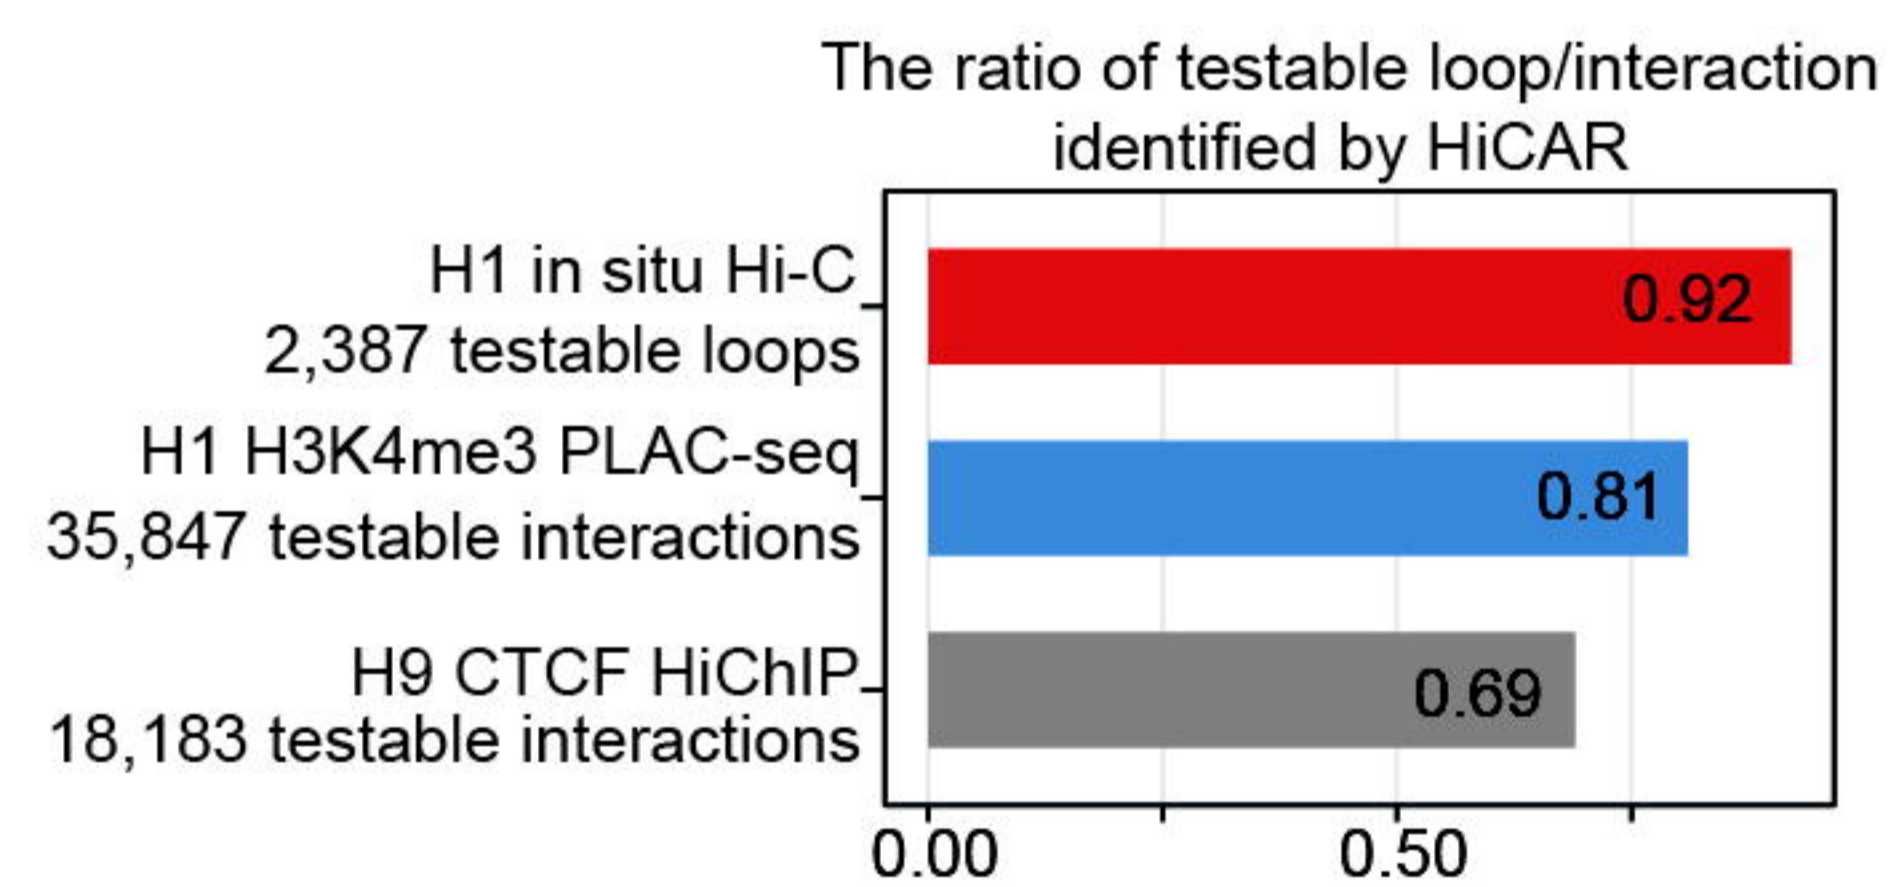

**C**

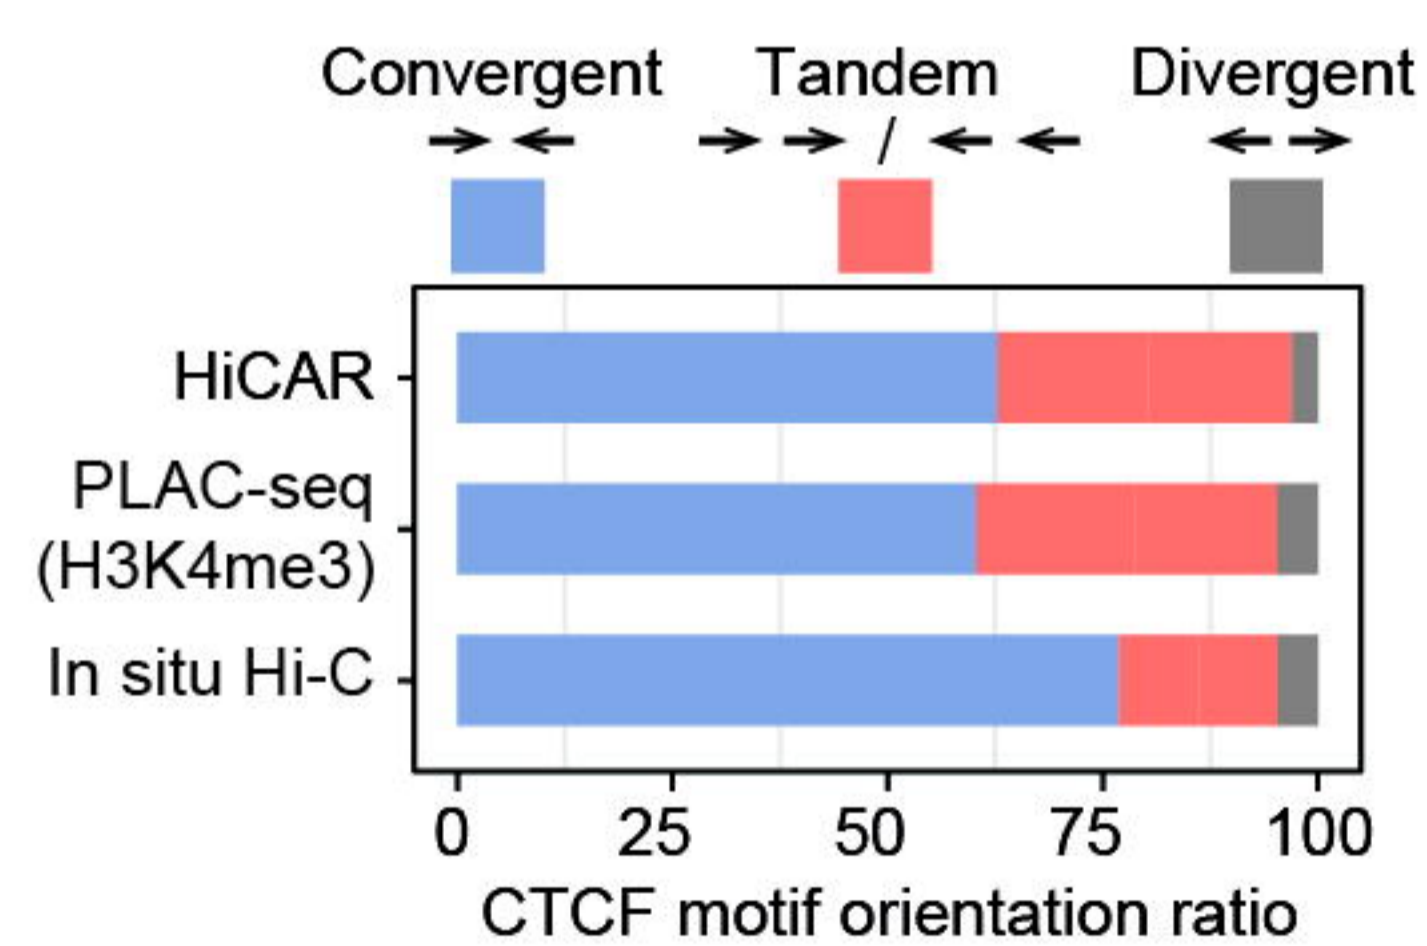

**D**

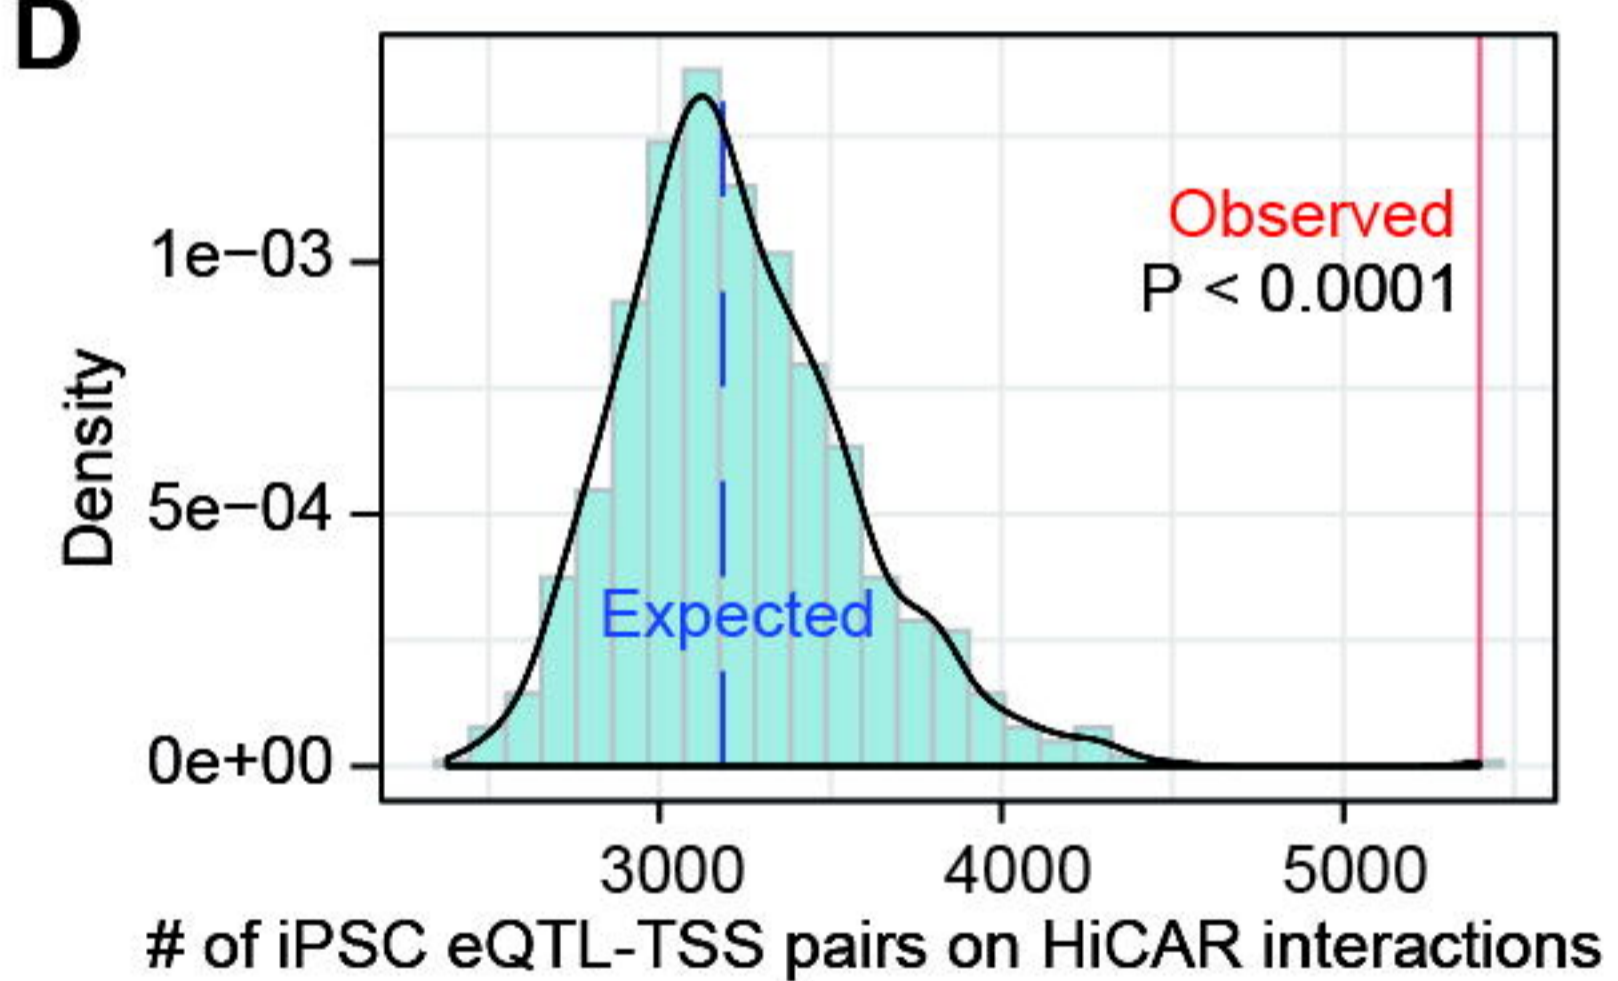

**E**

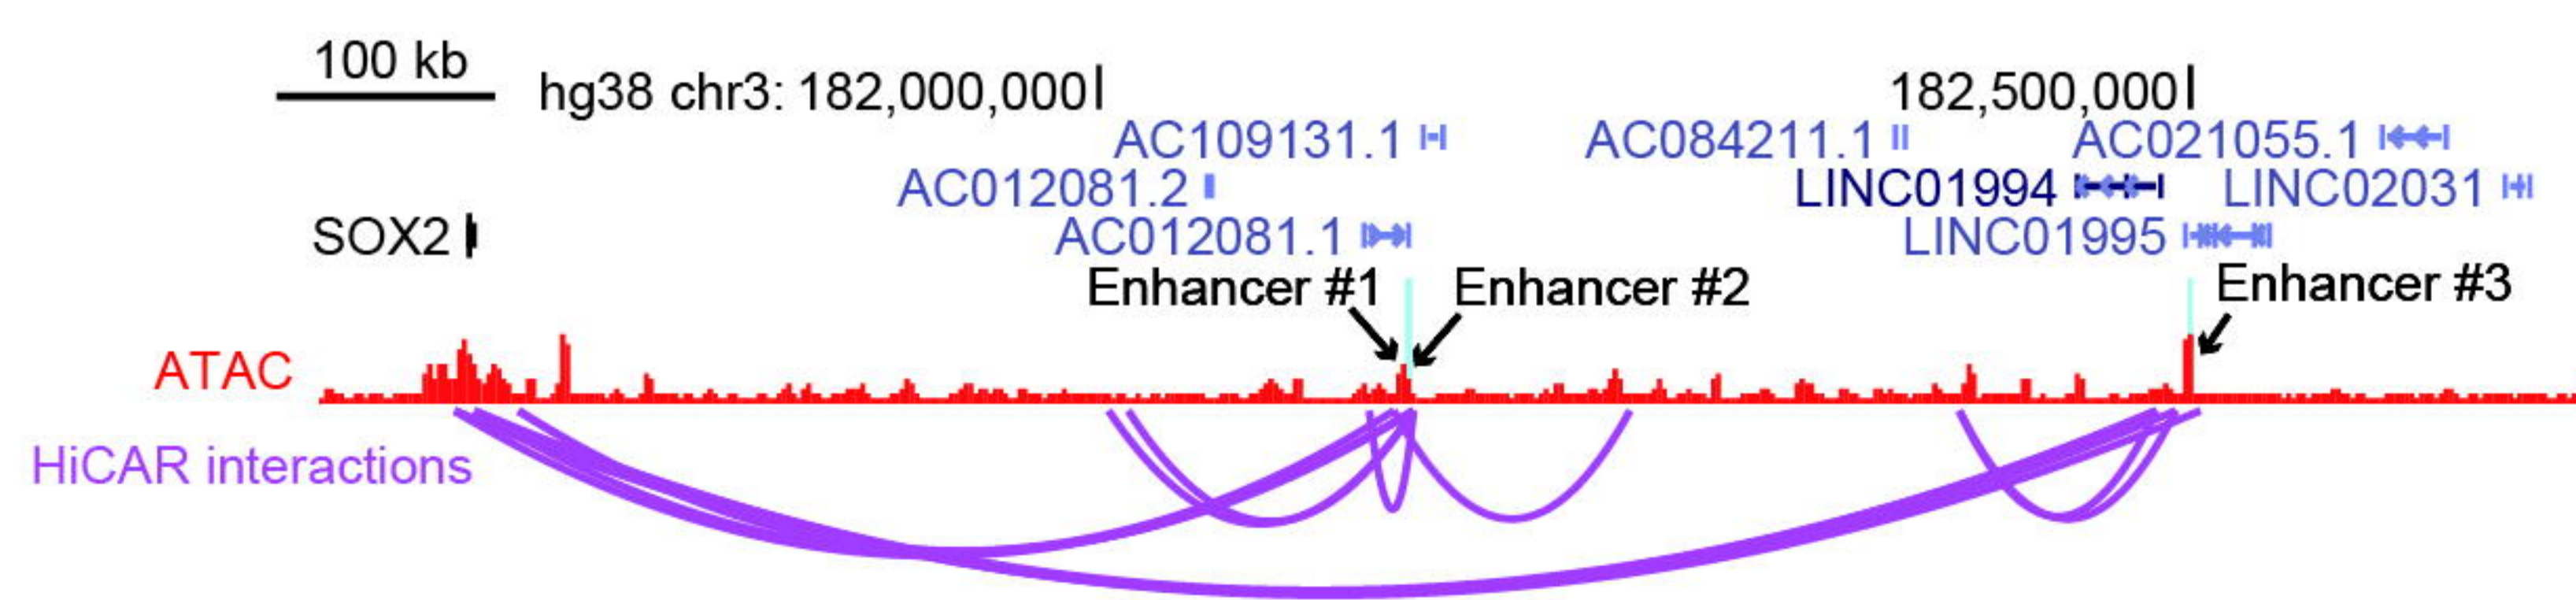

**F**

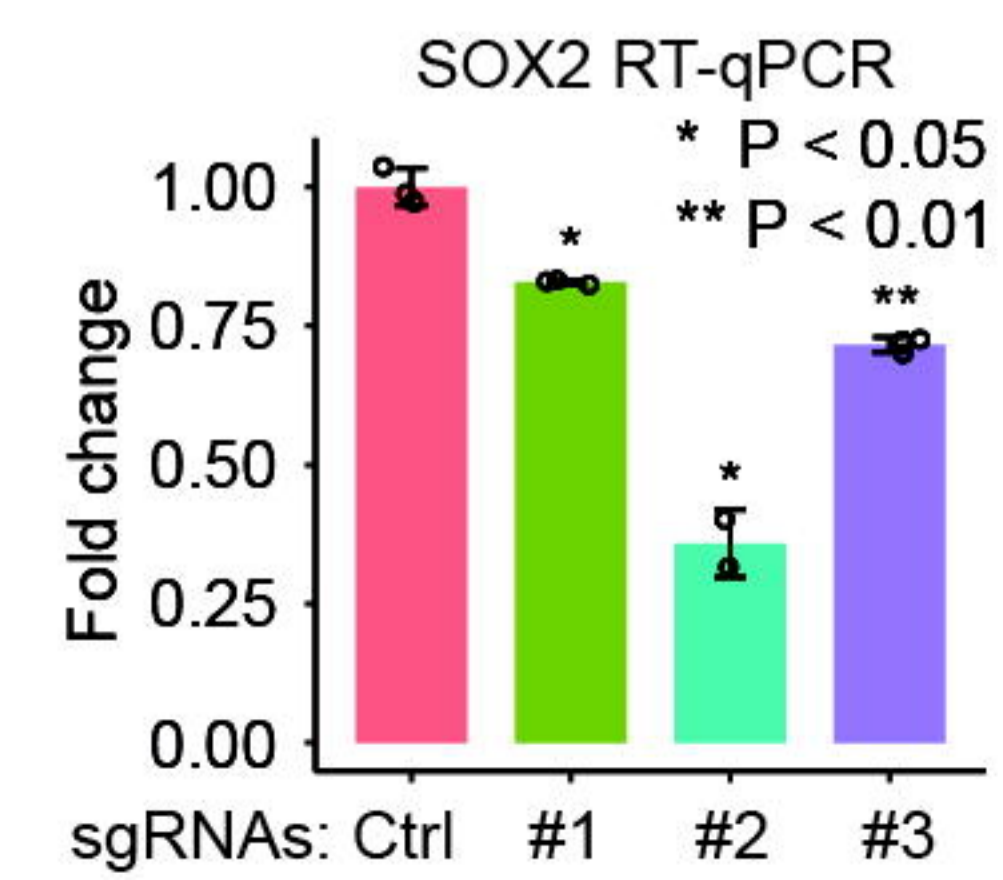

**Figure 4**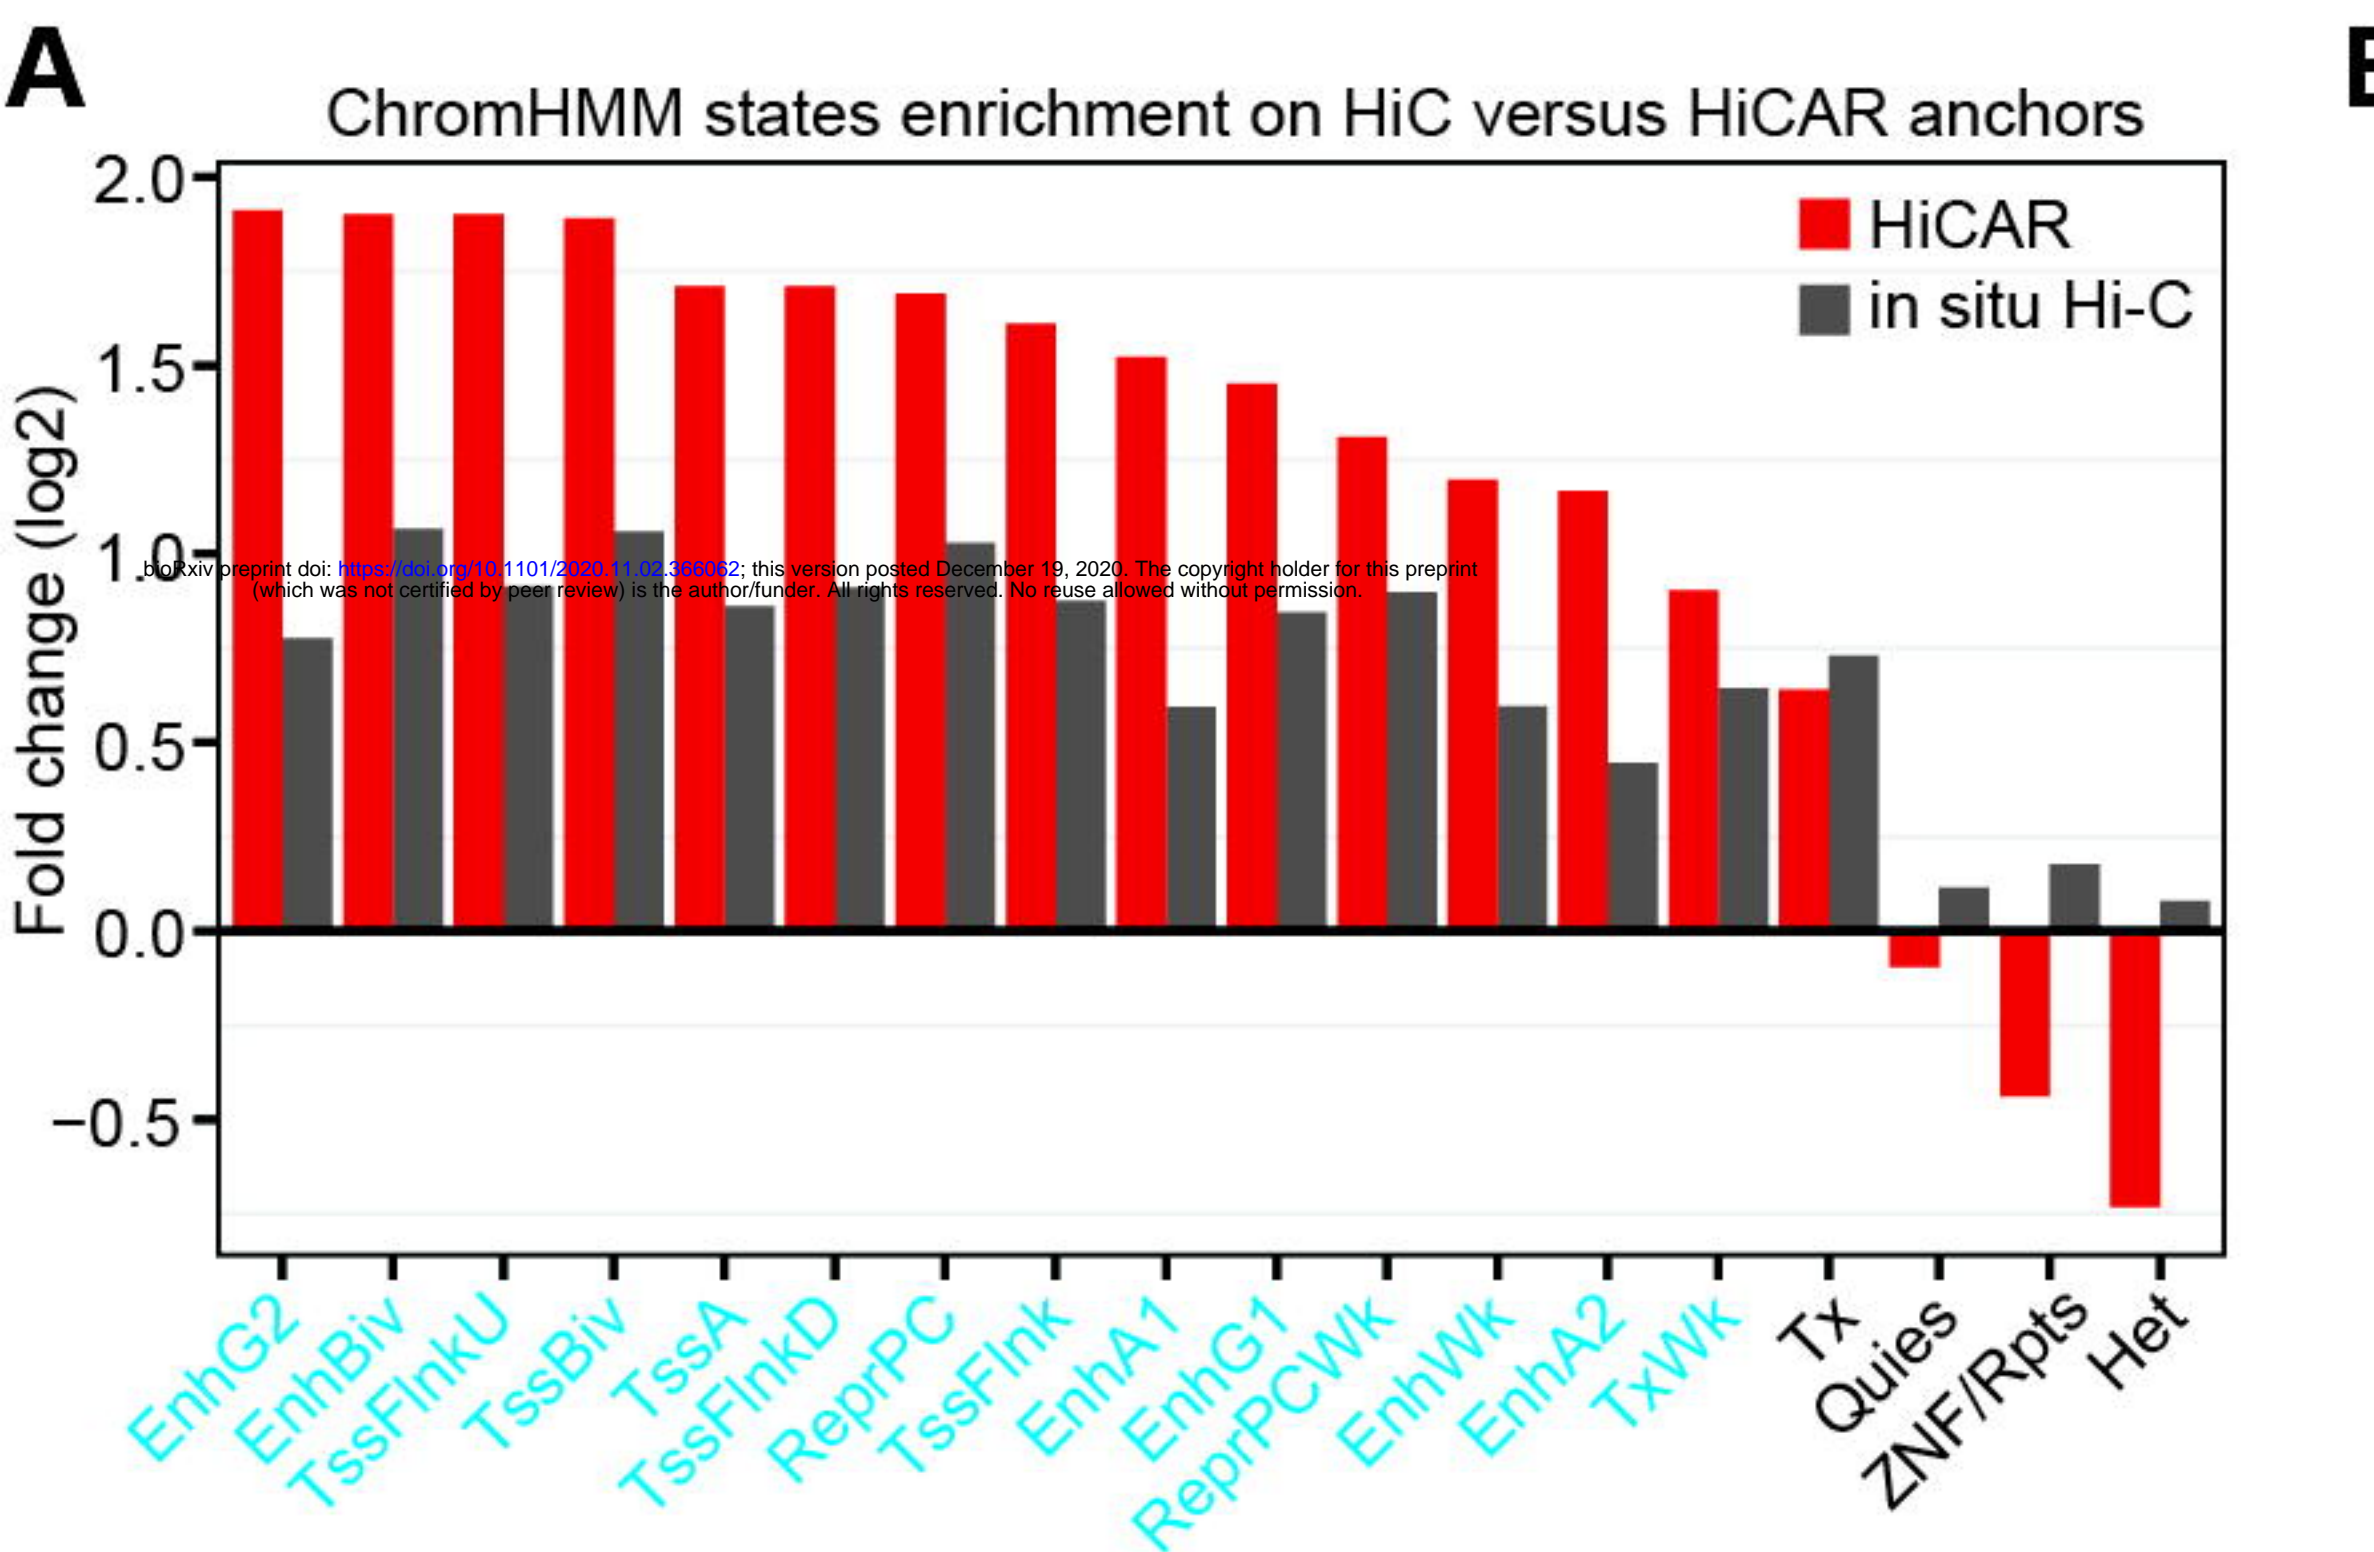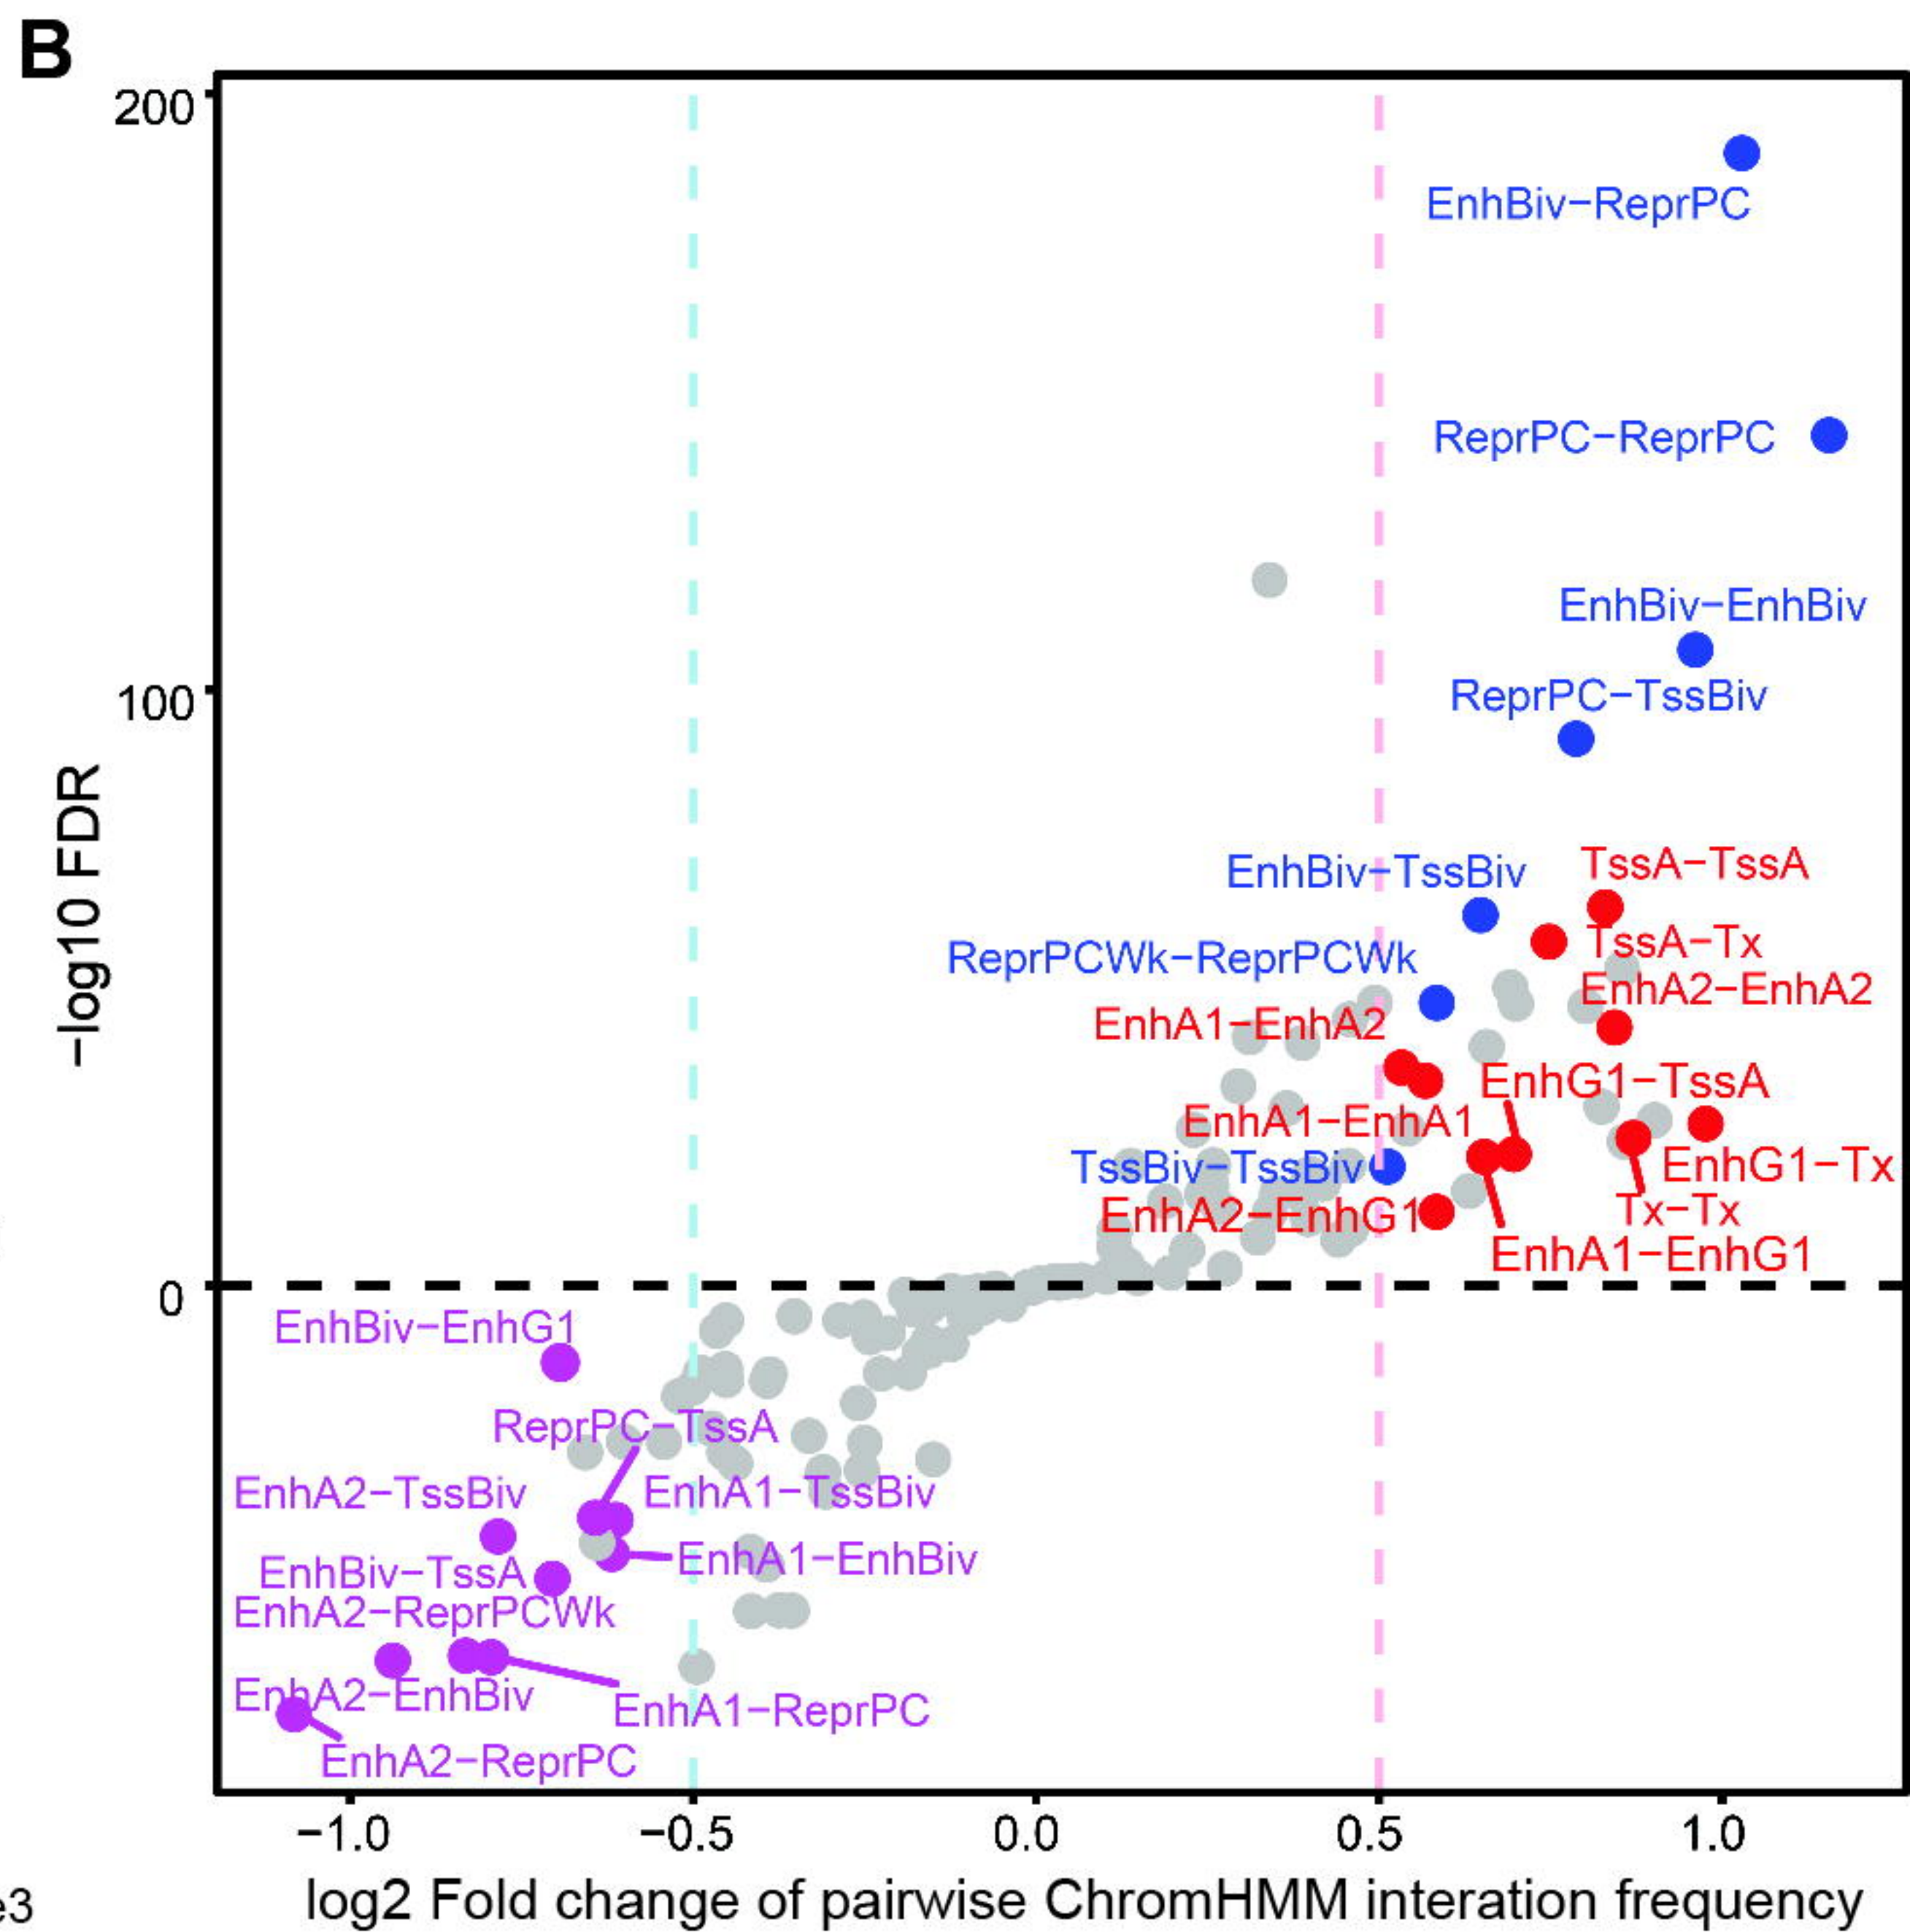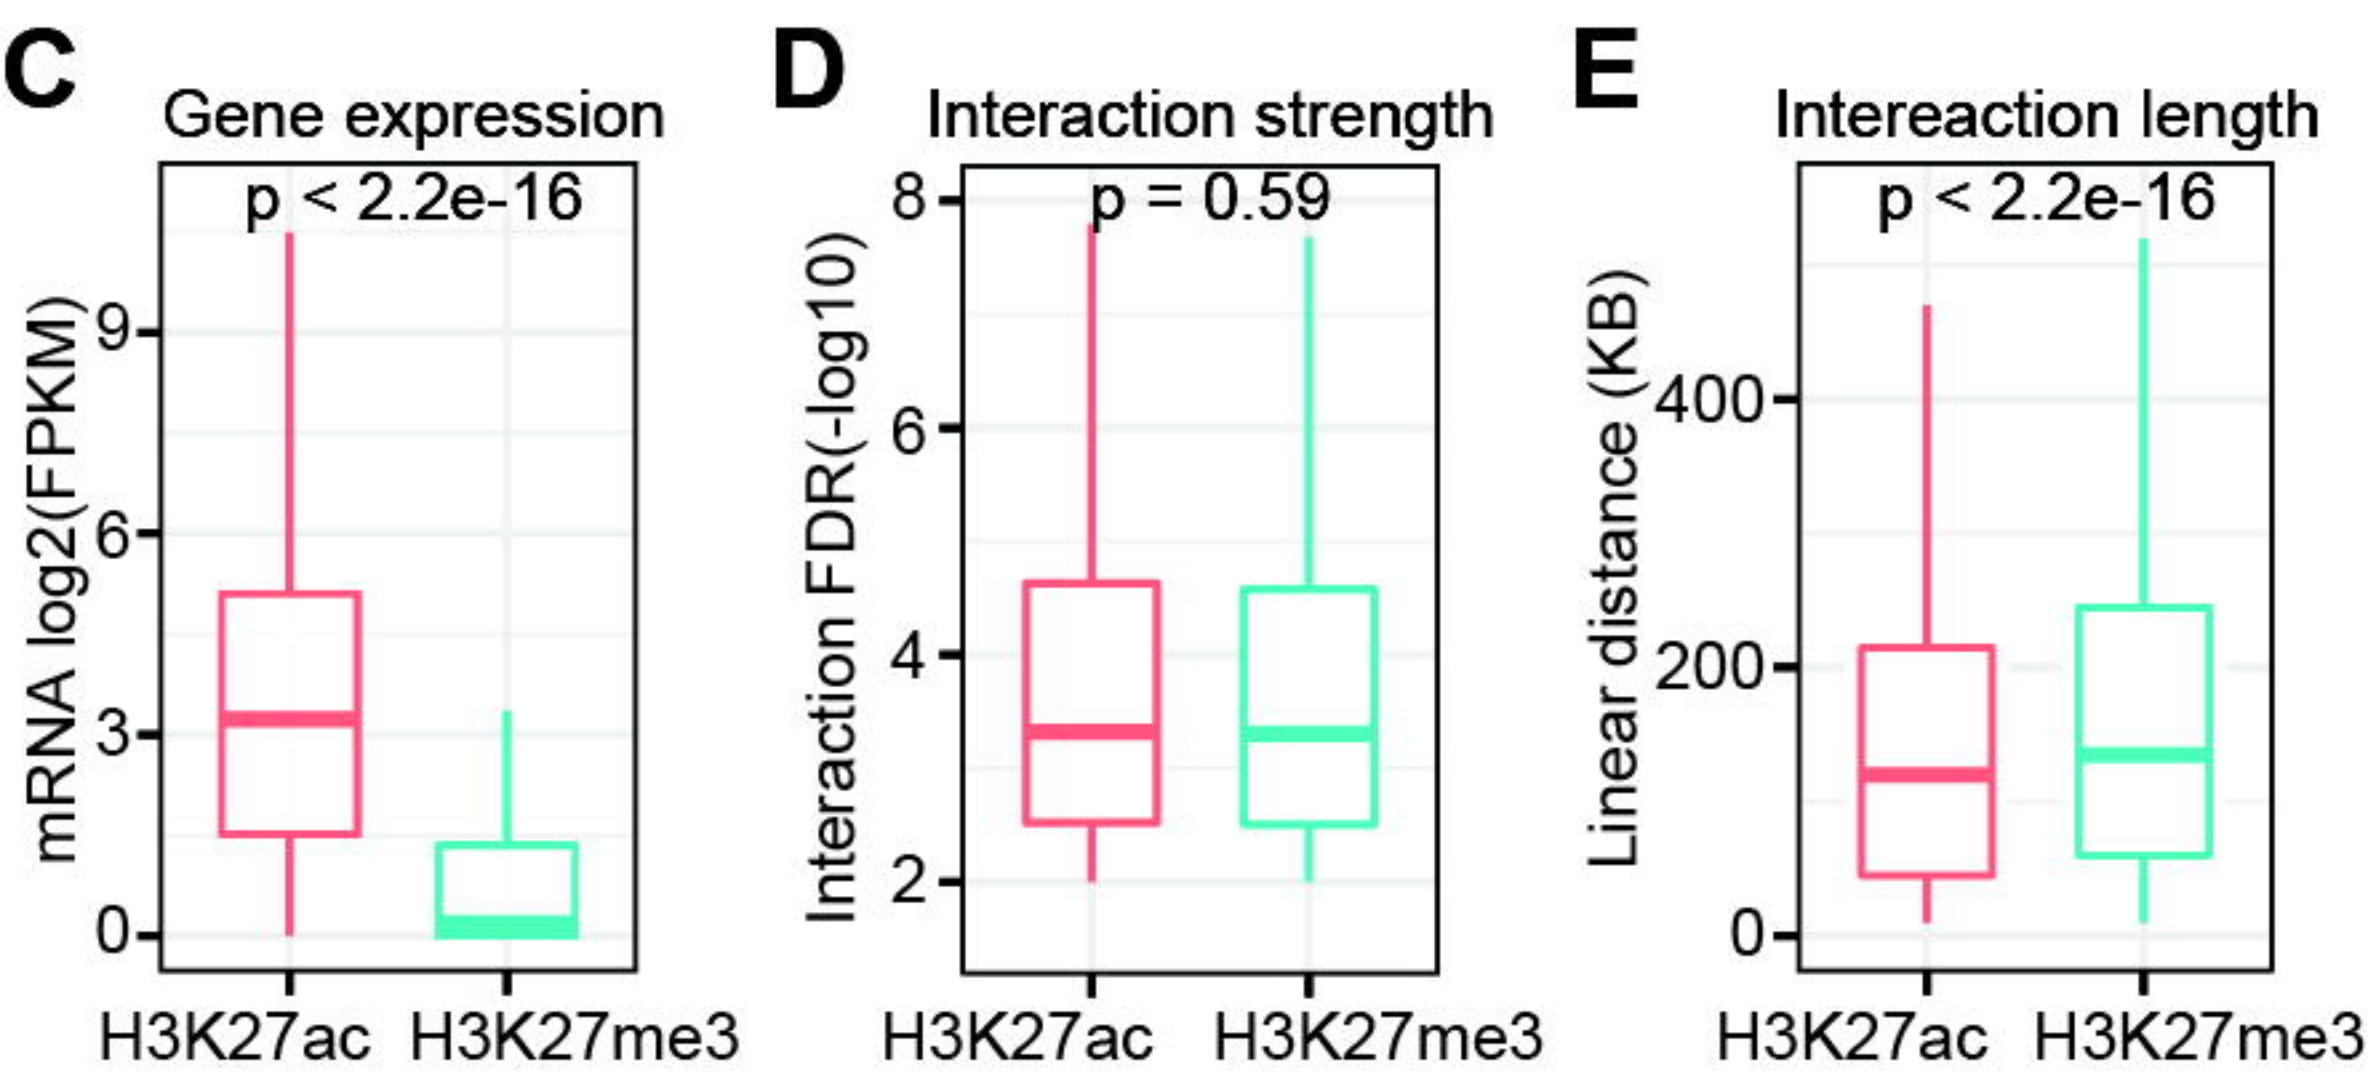

# Figure 5

bioRxiv preprint doi: <https://doi.org/10.1101/2020.11.02.366062>; this version posted December 19, 2020. The copyright holder for this preprint (which was not certified by peer review) is the author/funder. All rights reserved. No reuse allowed without permission.

## A

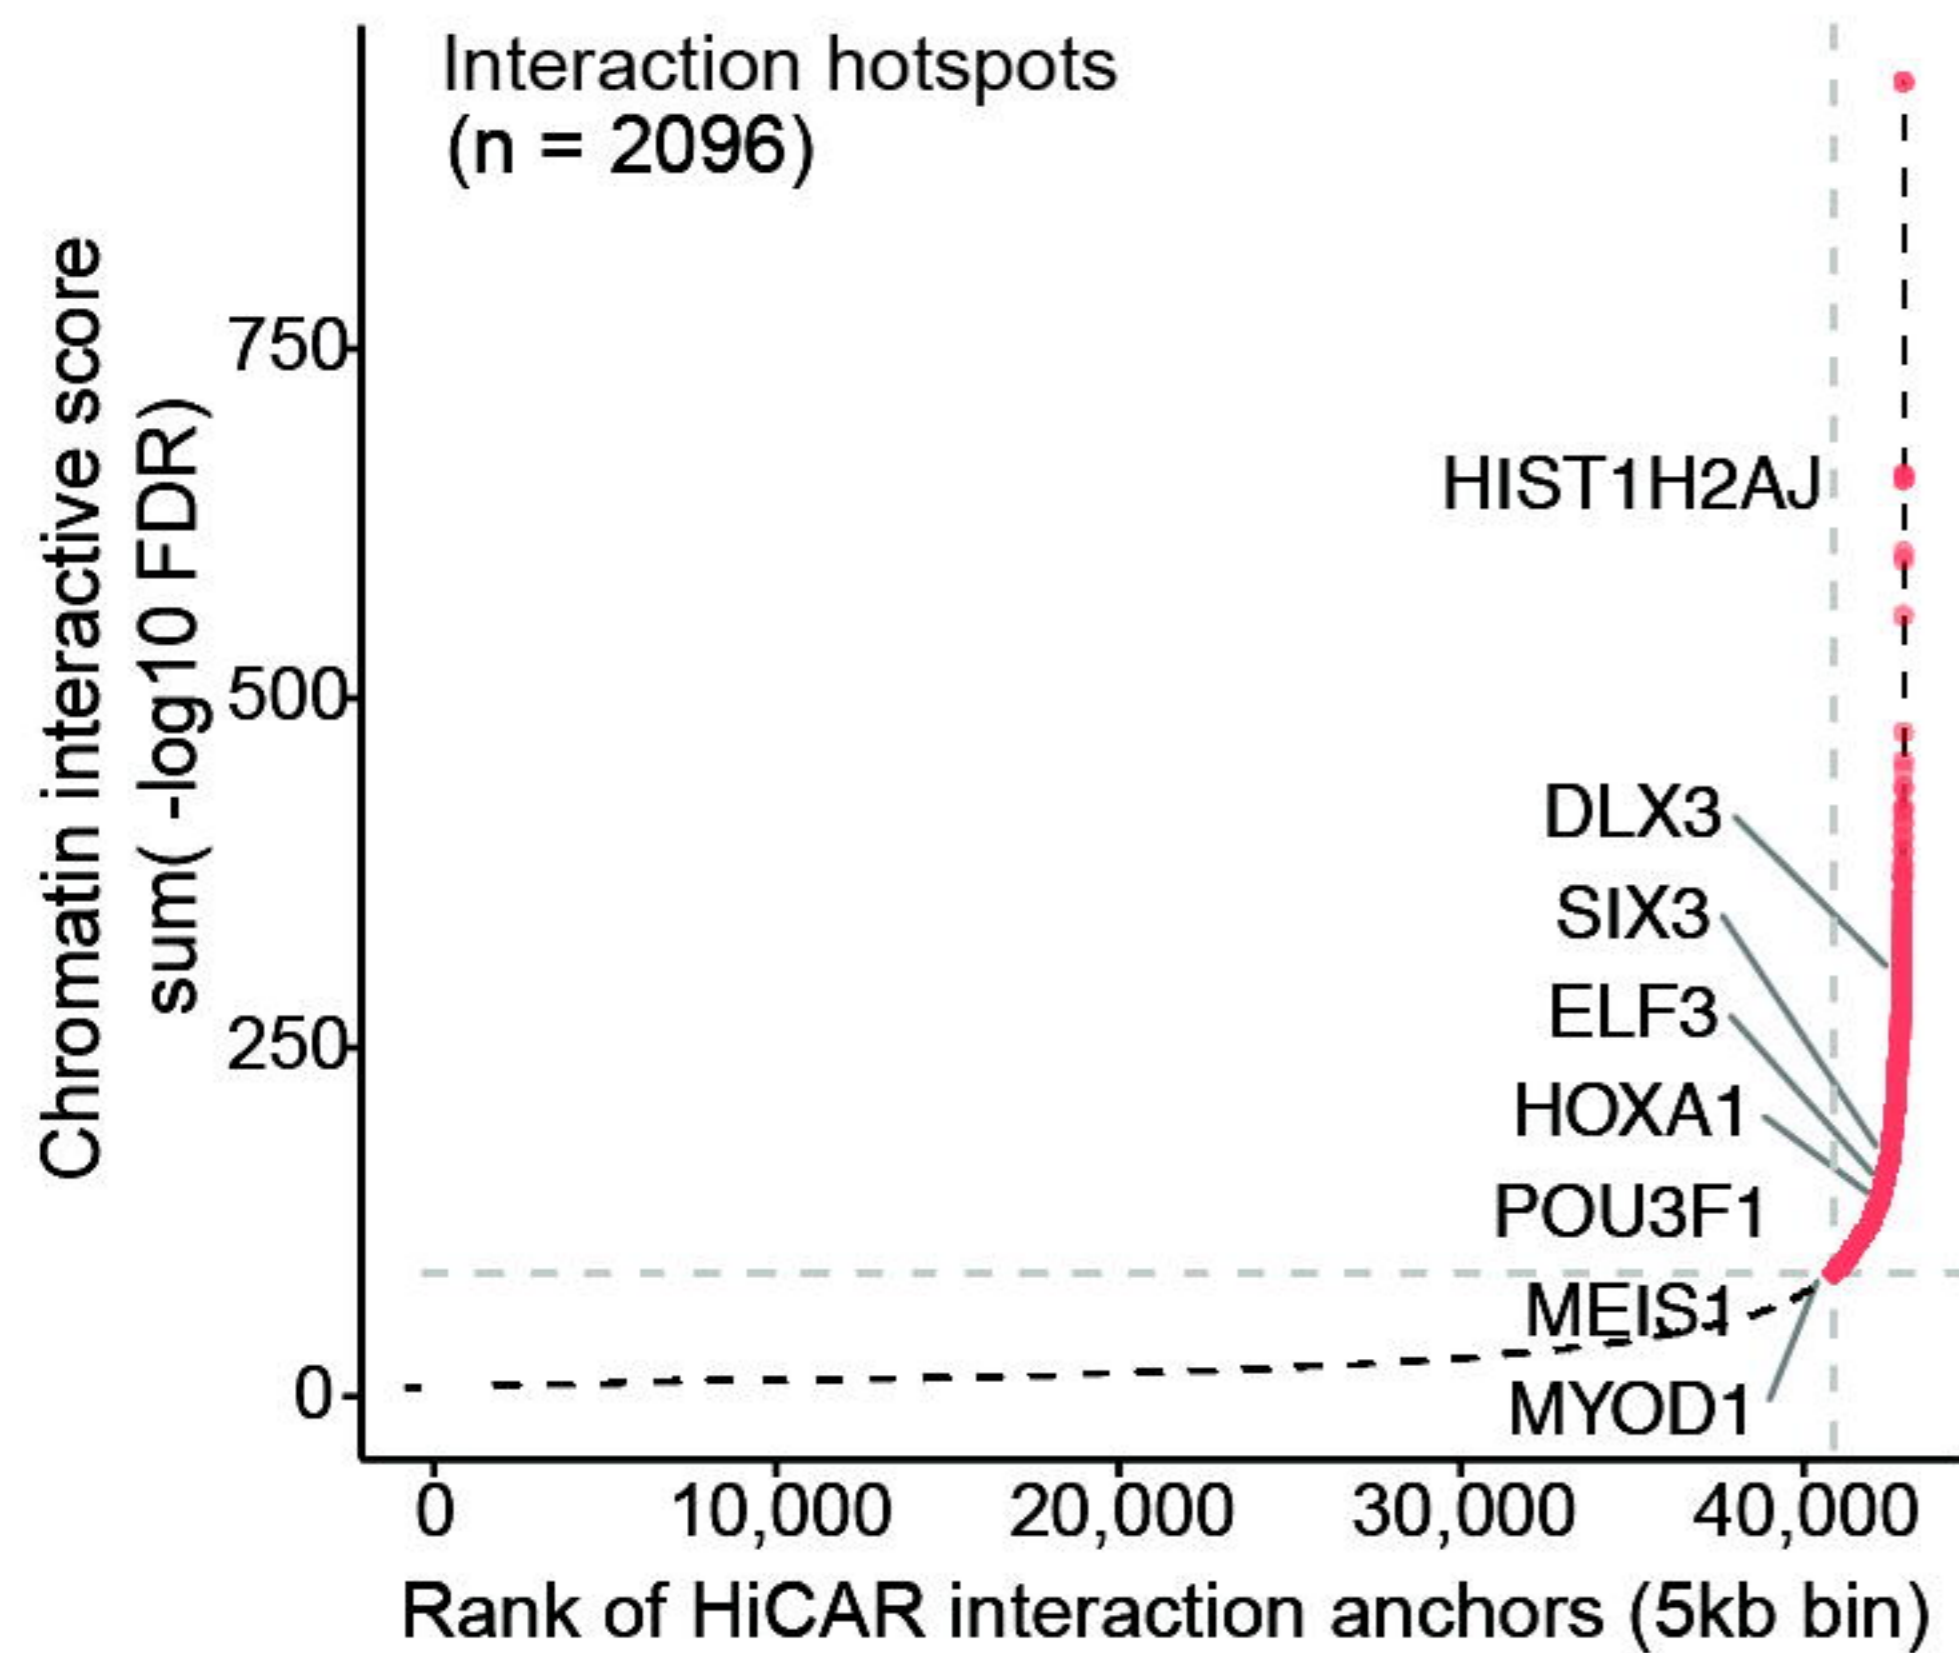

## B

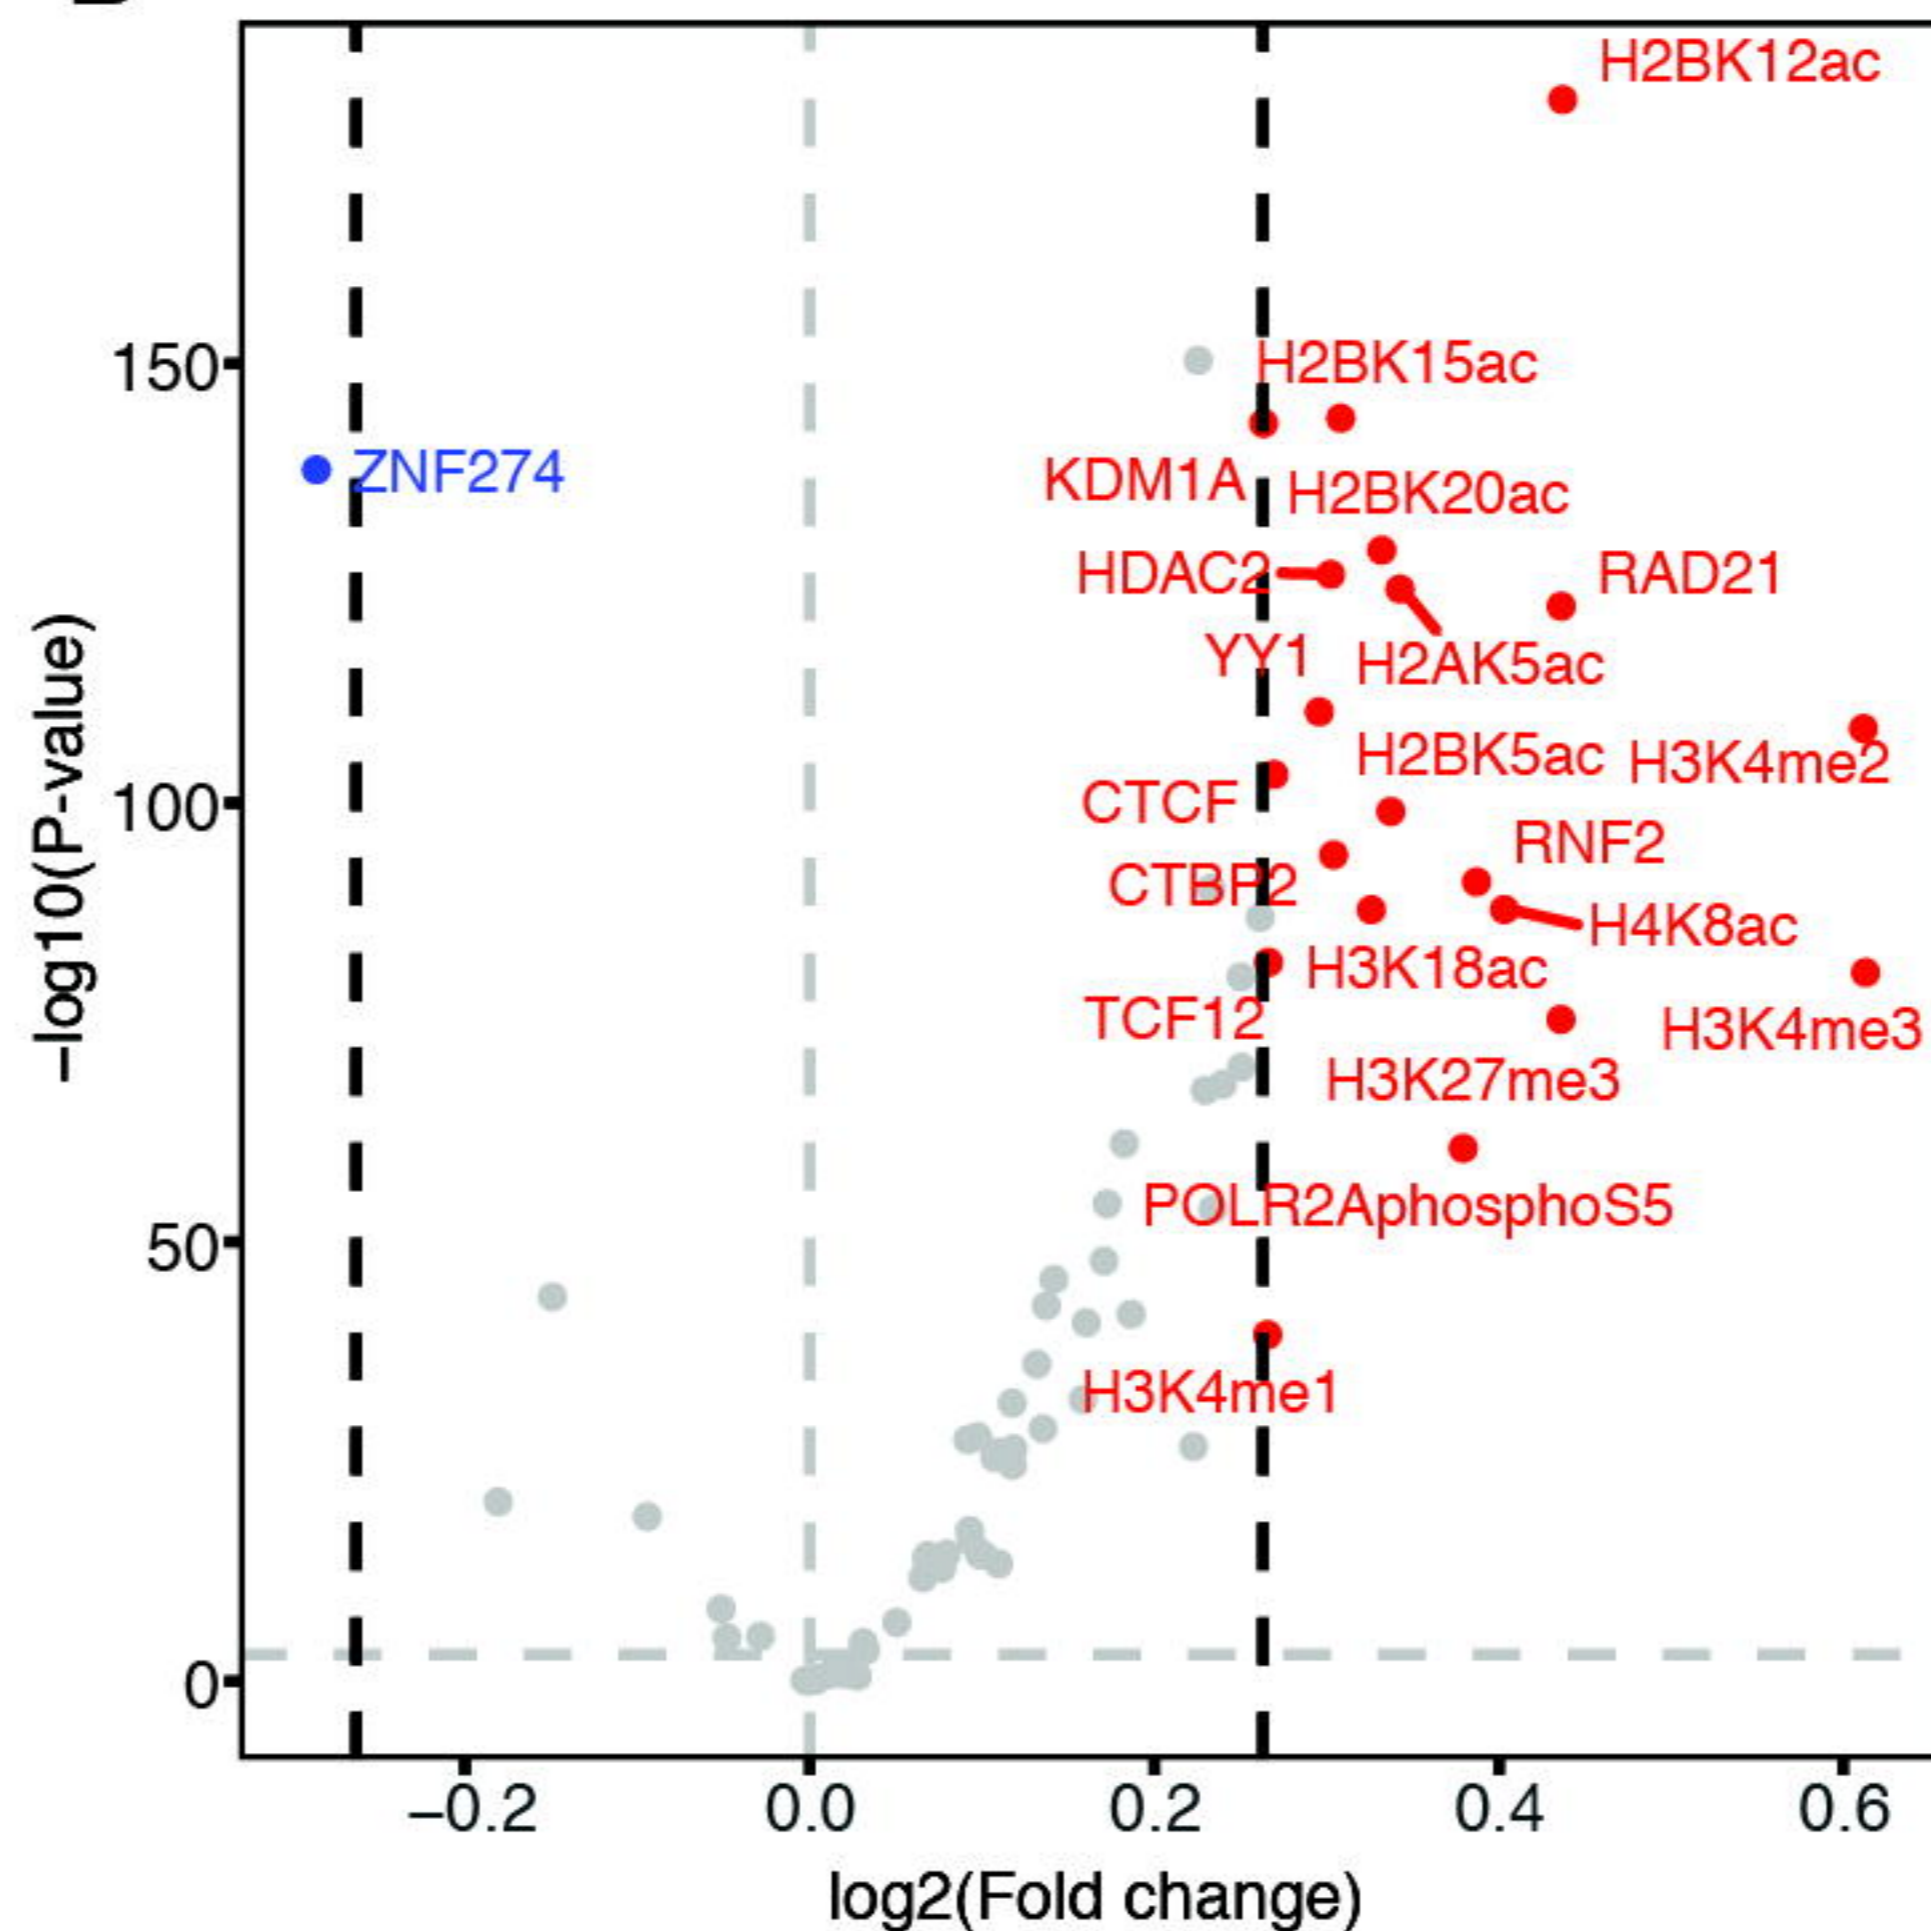

## C

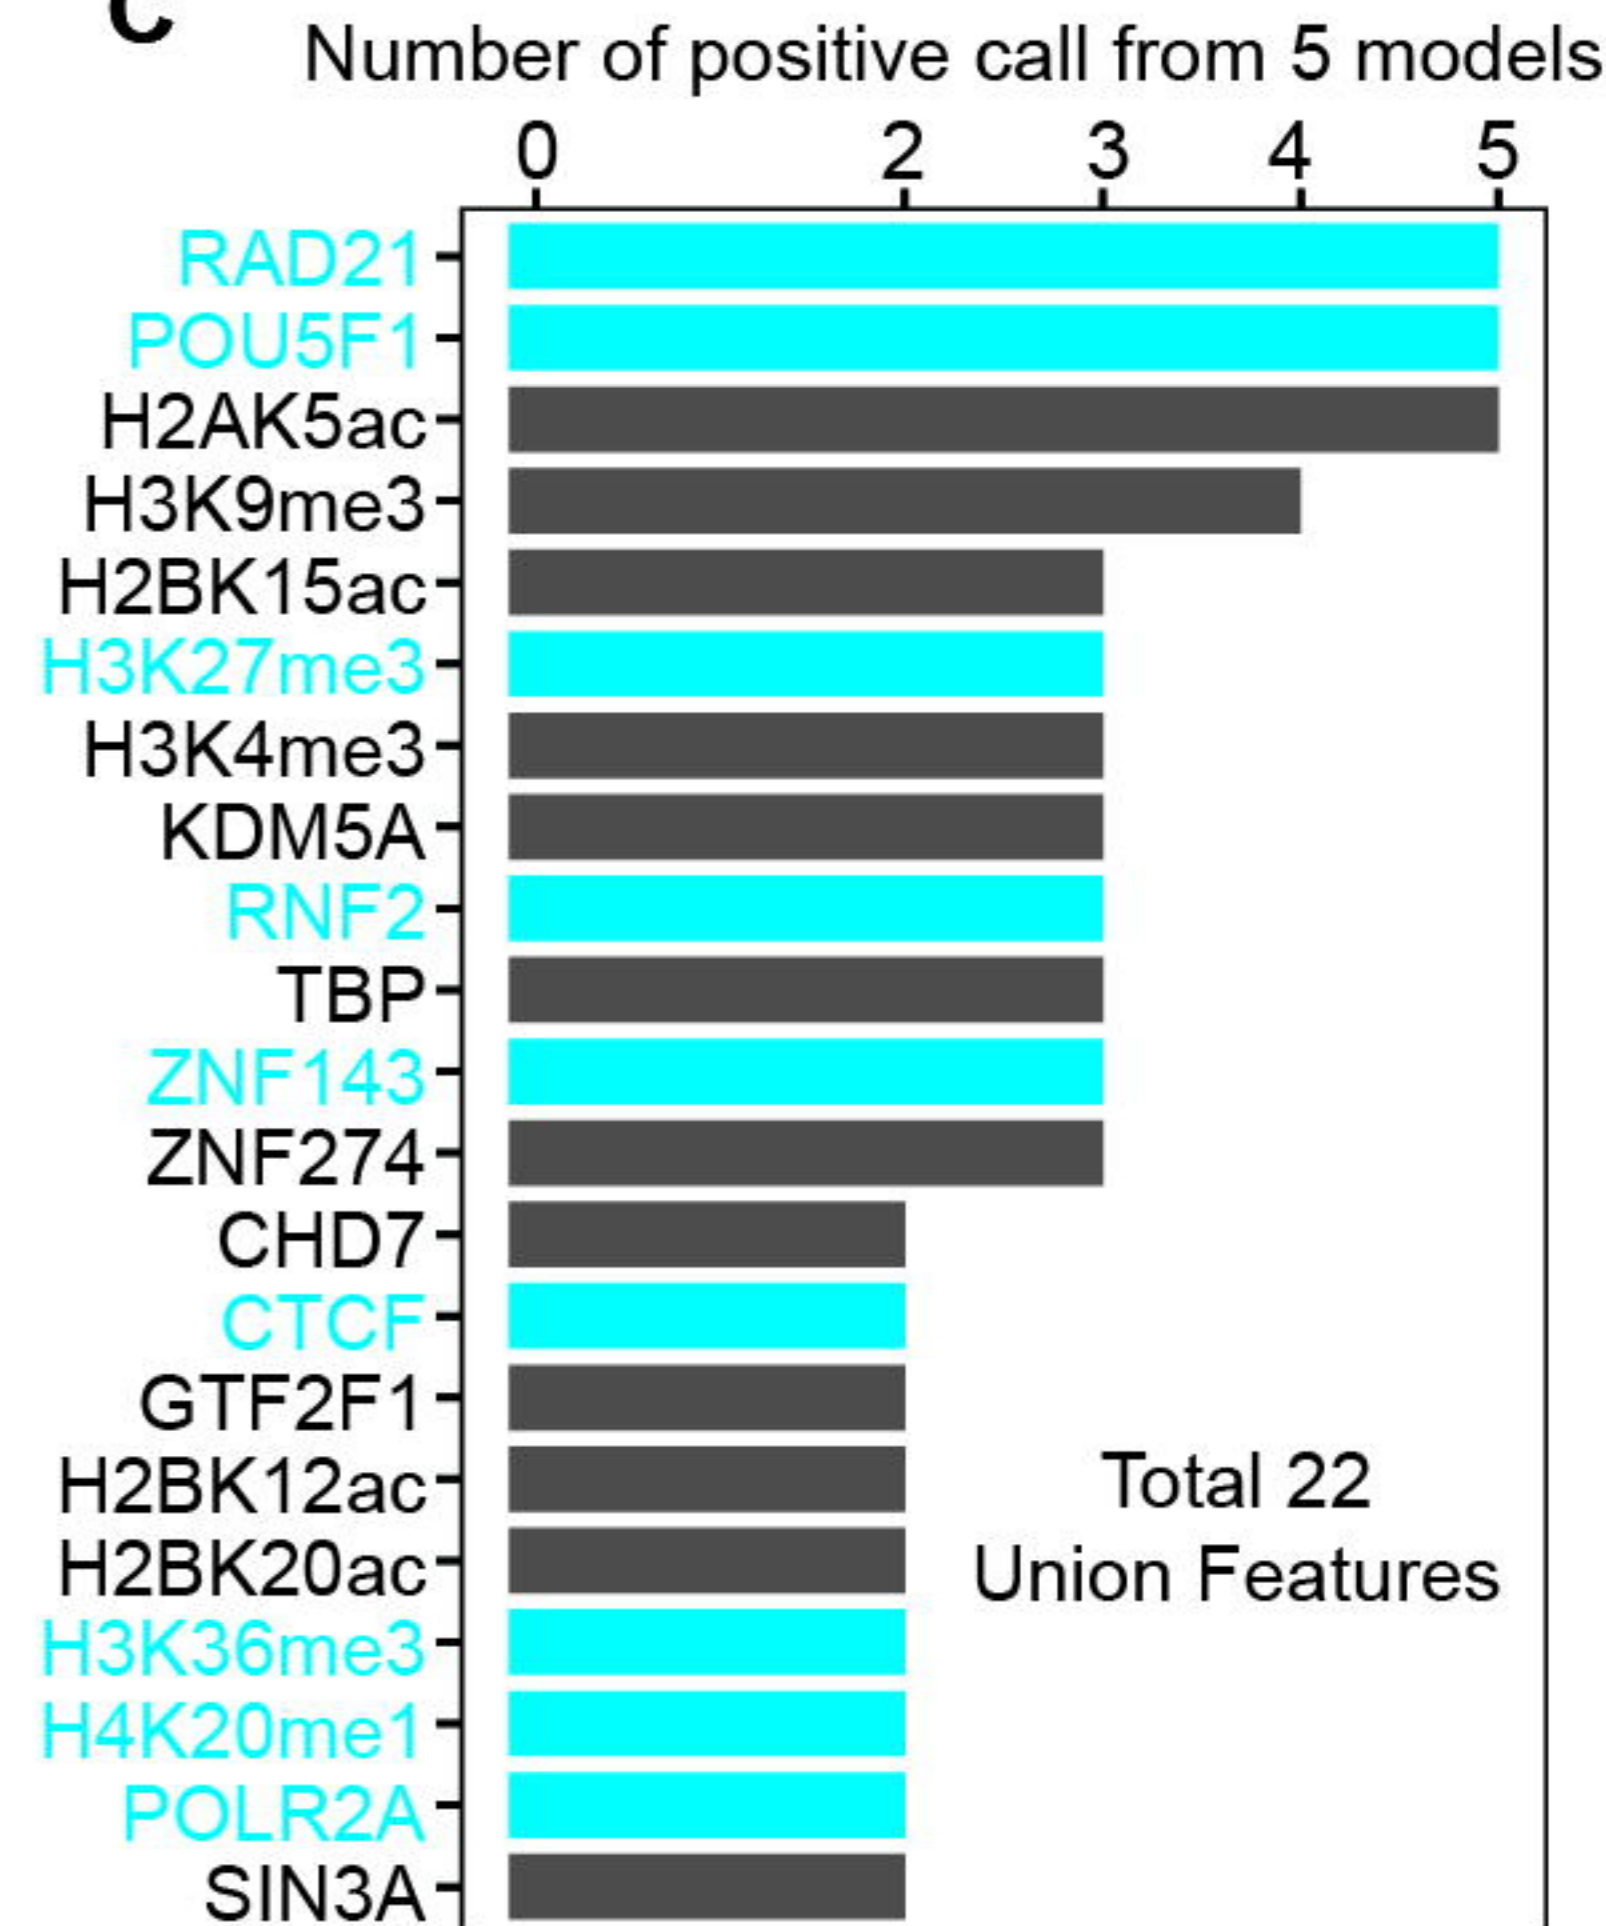

# Supplementary Figure 1

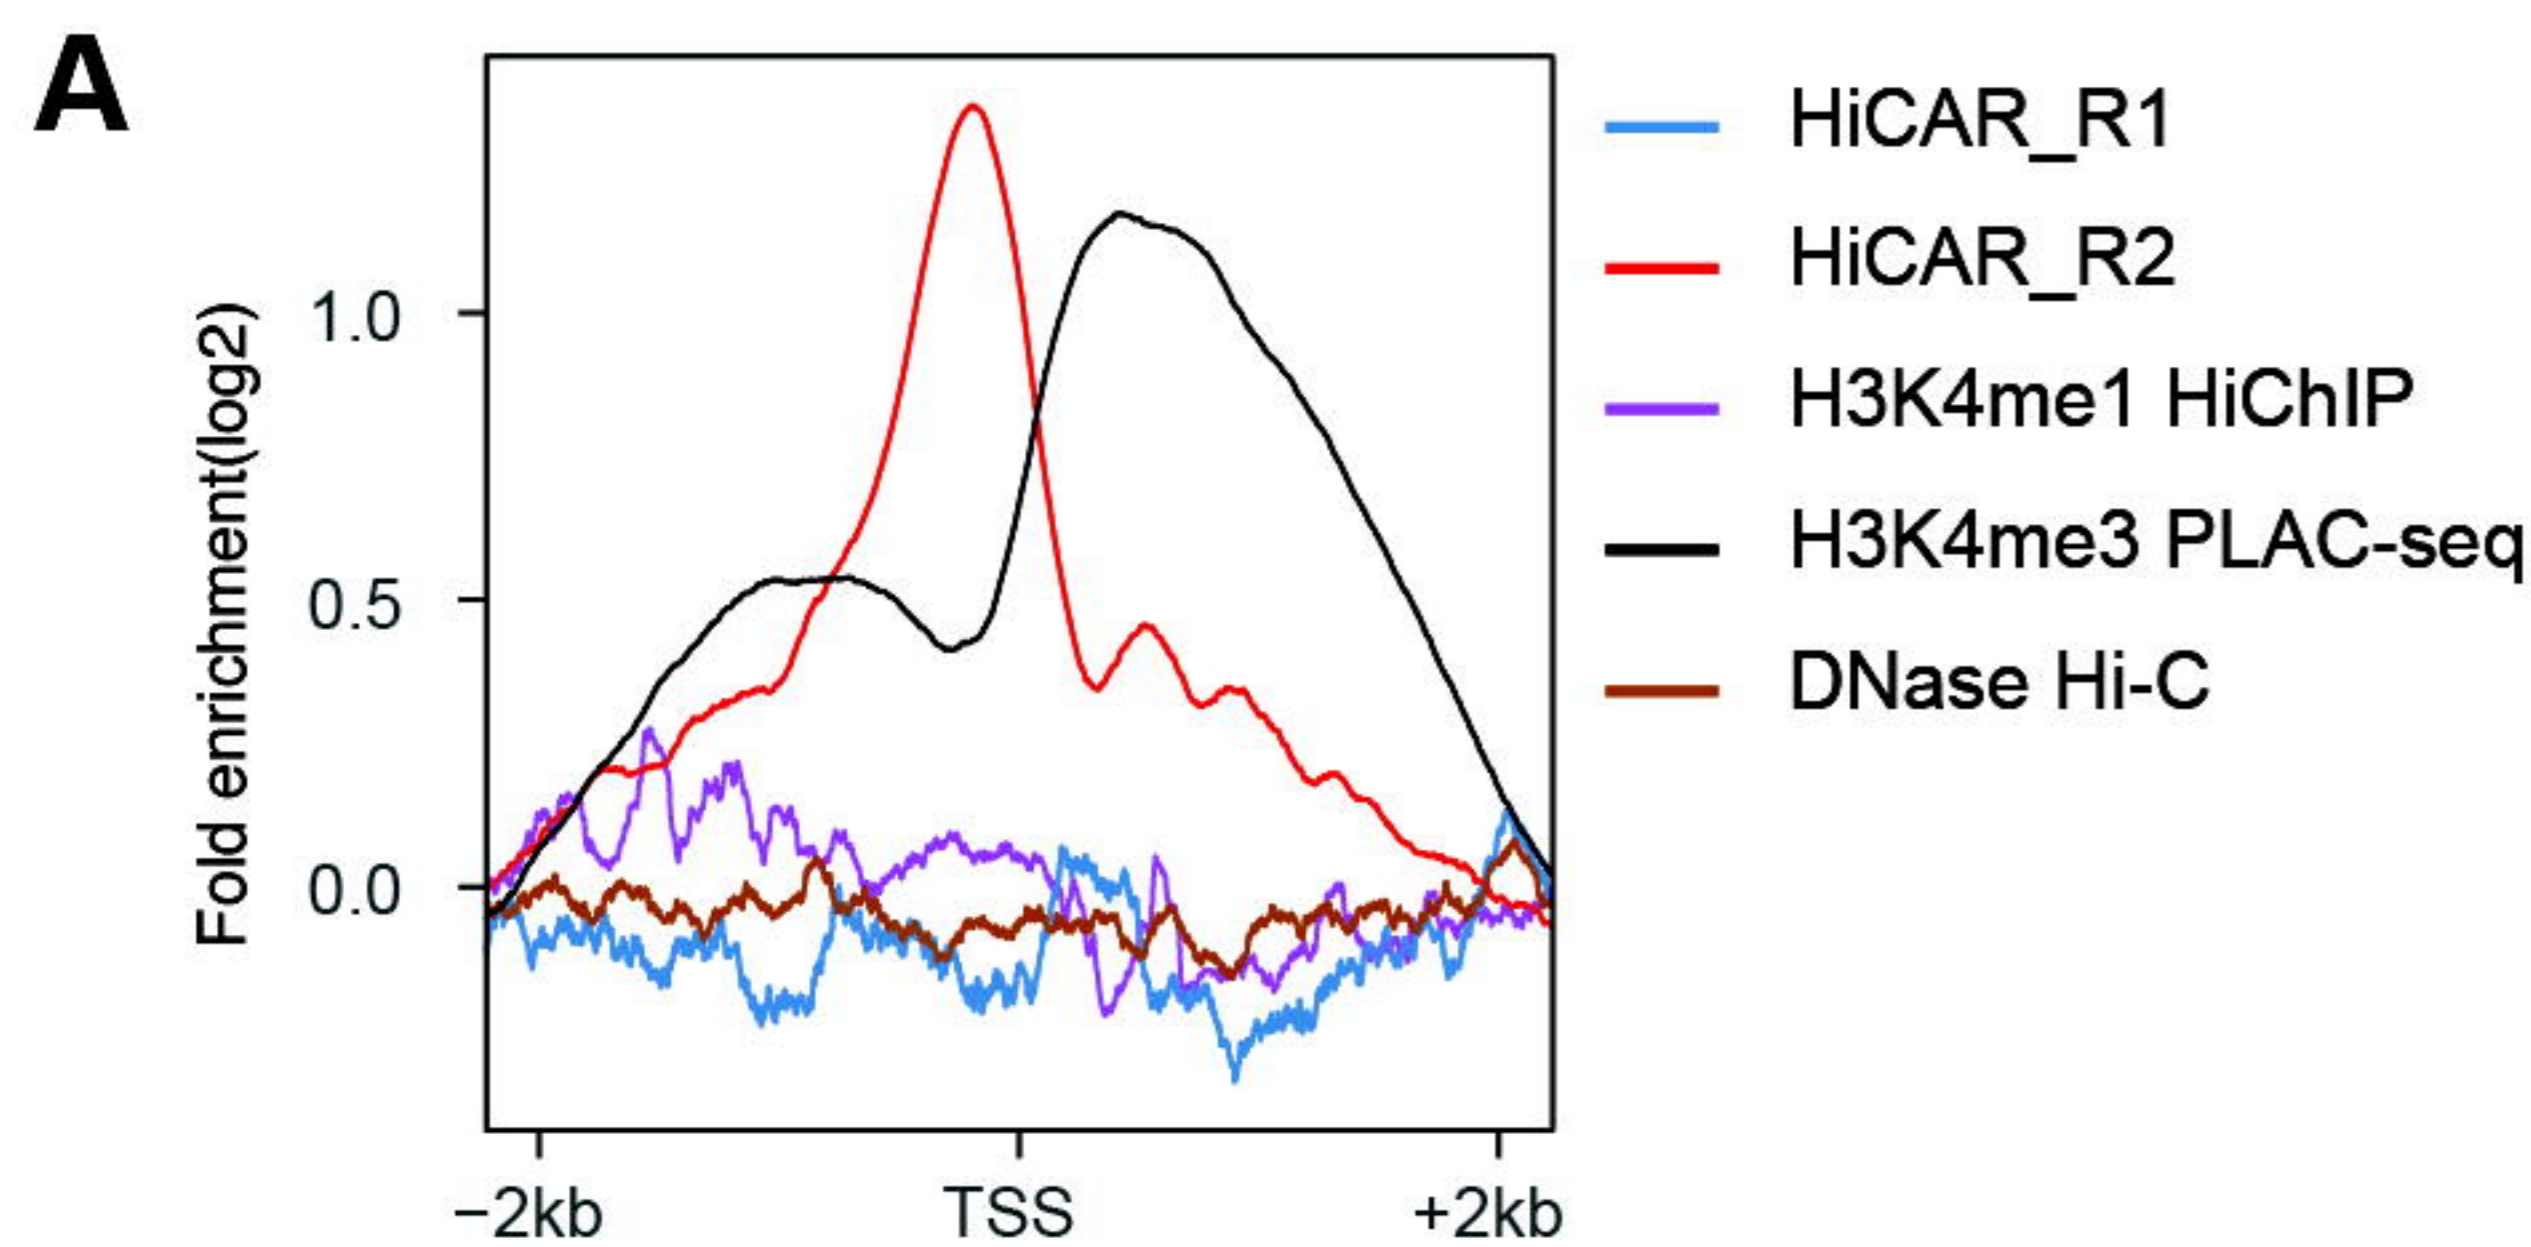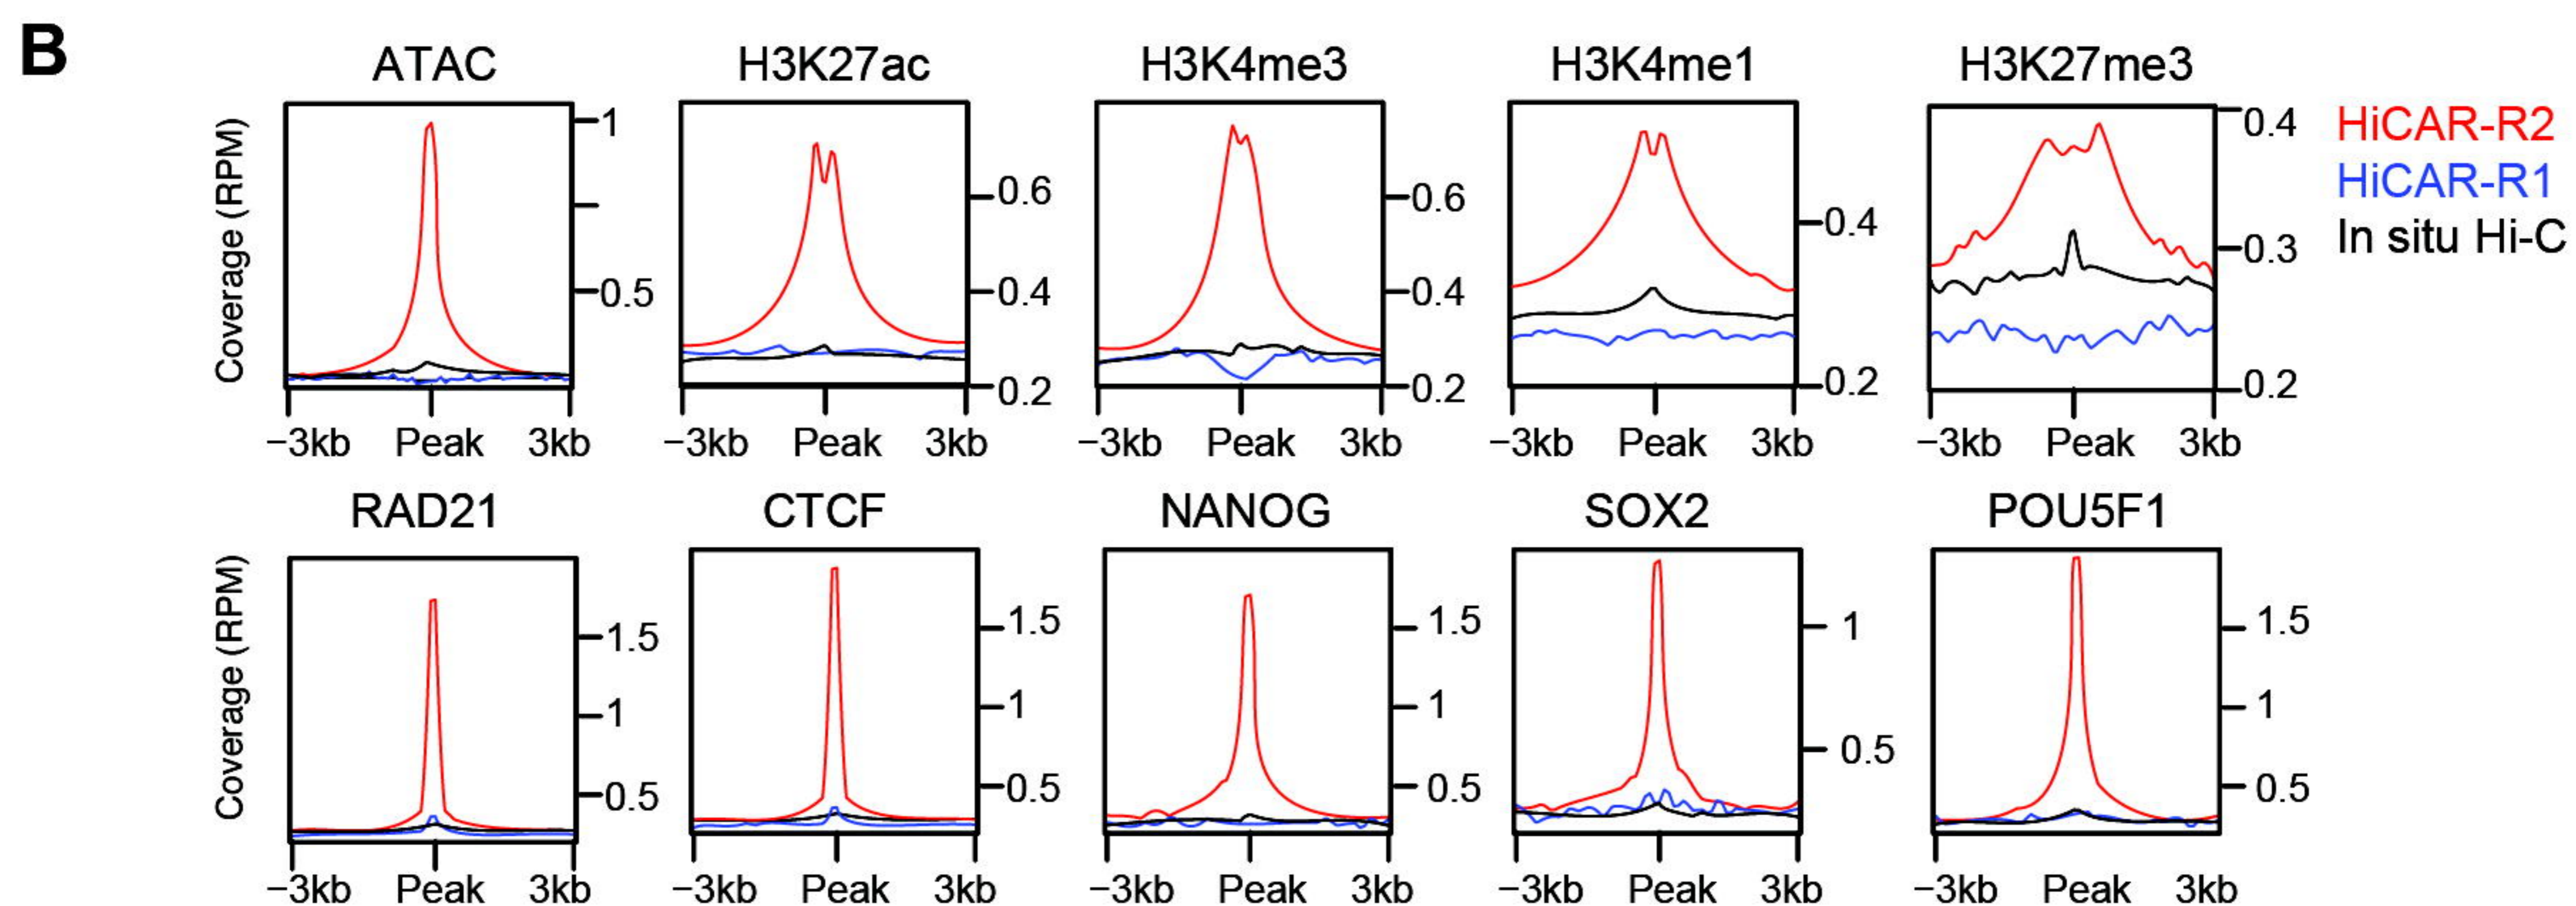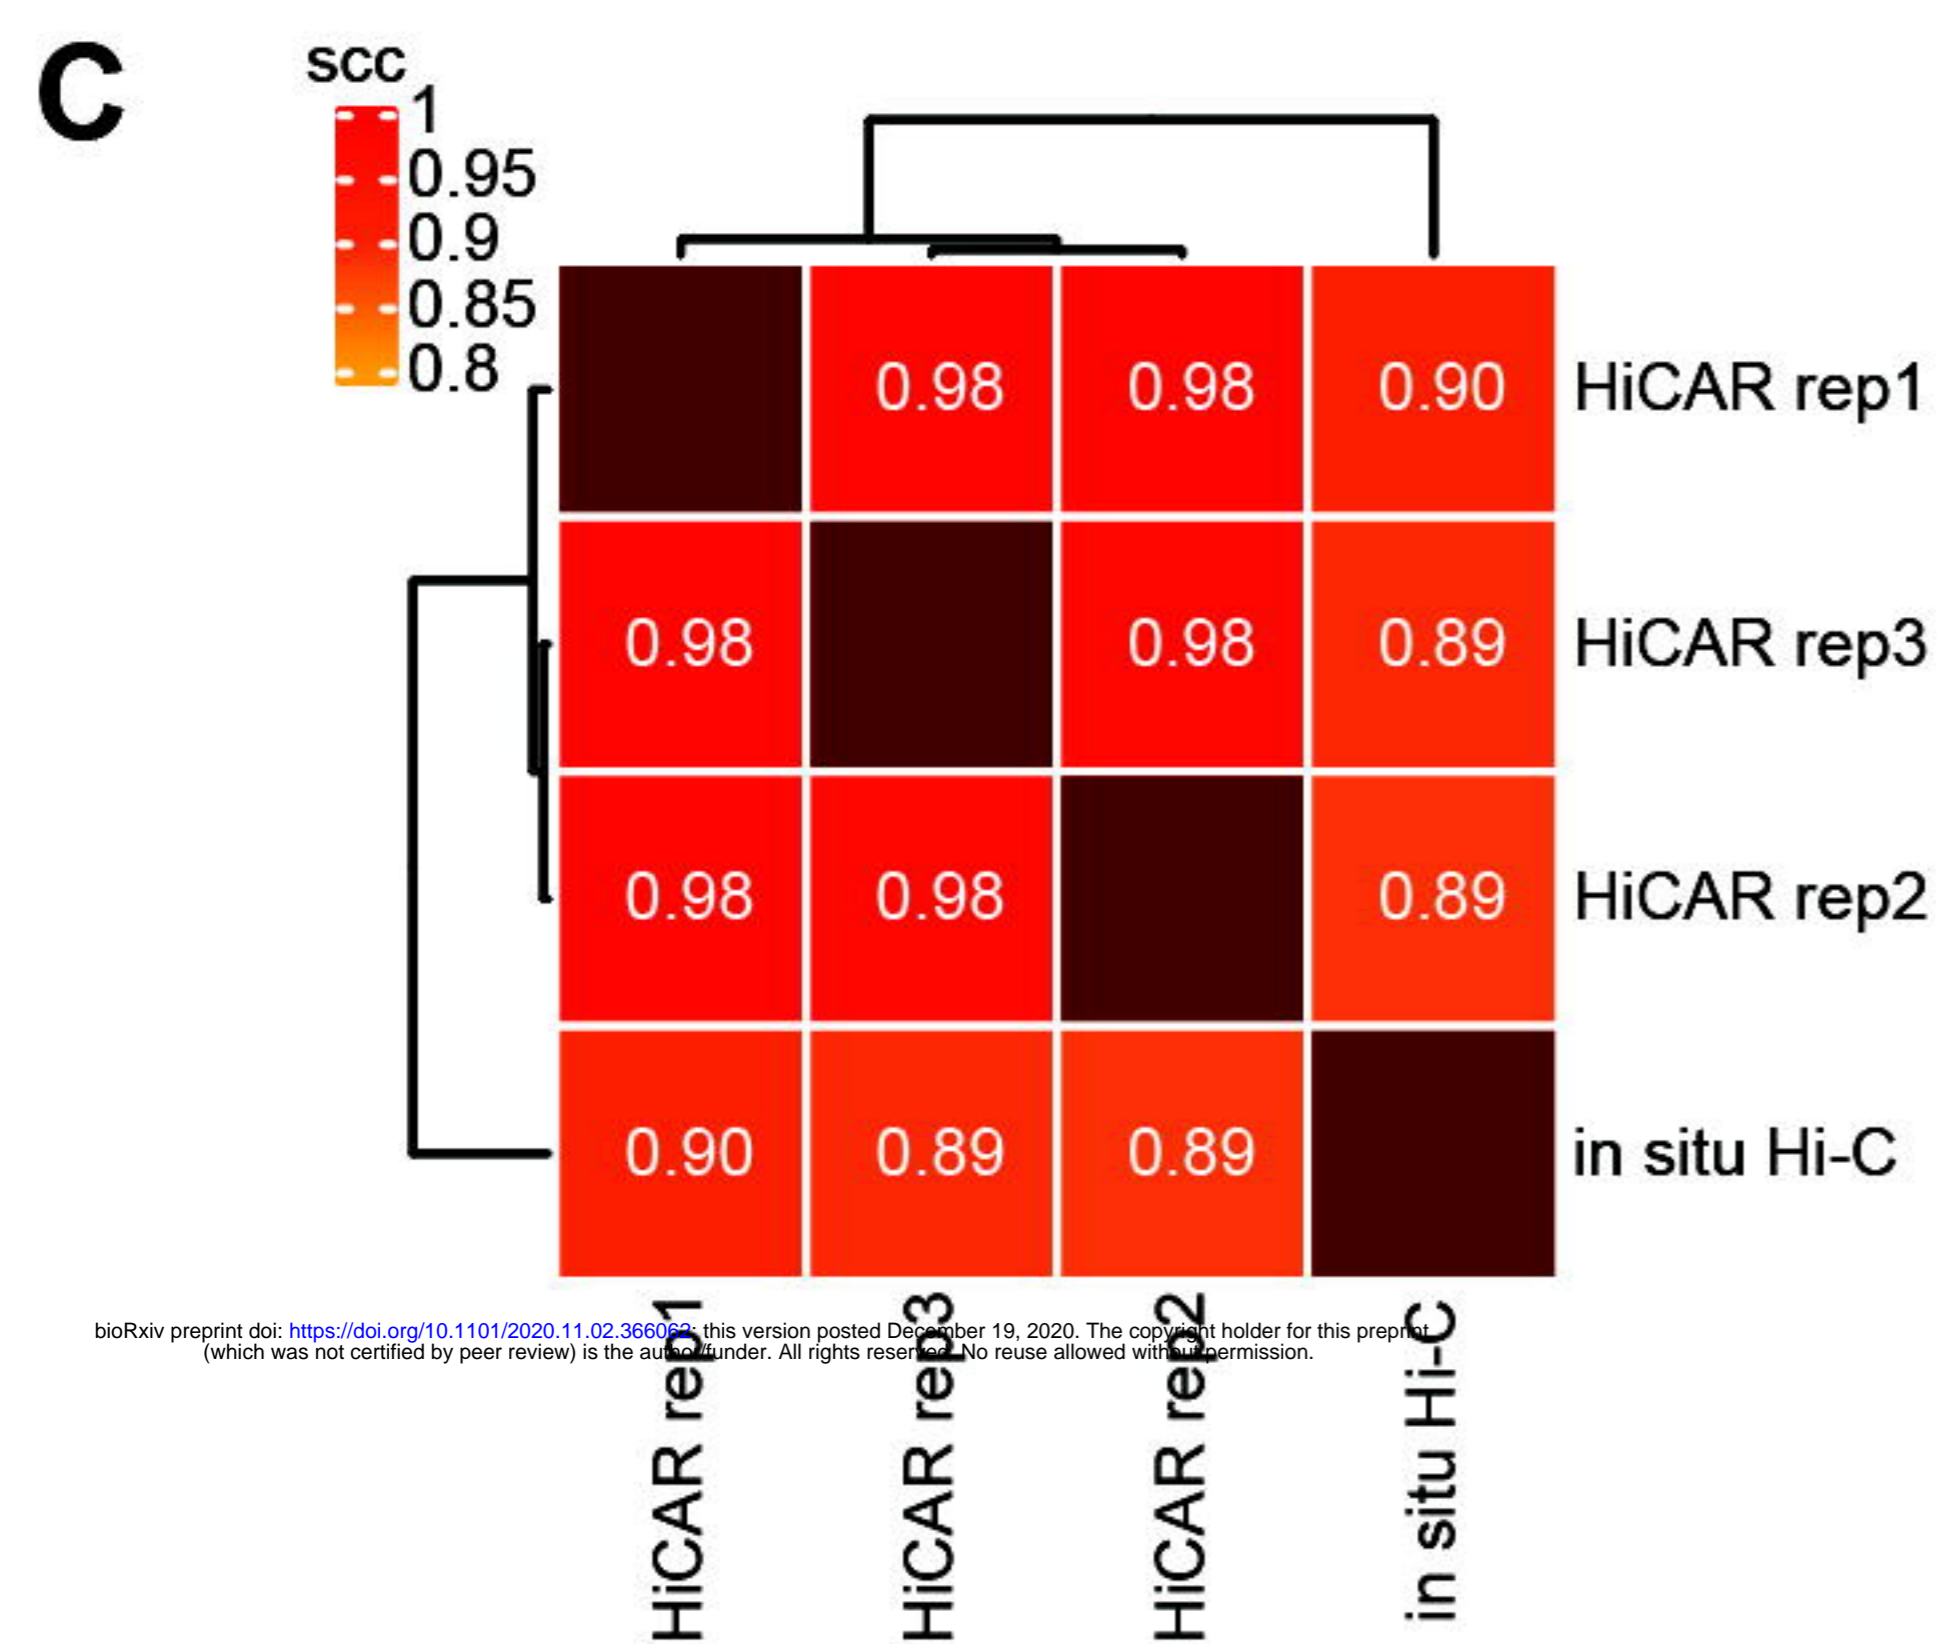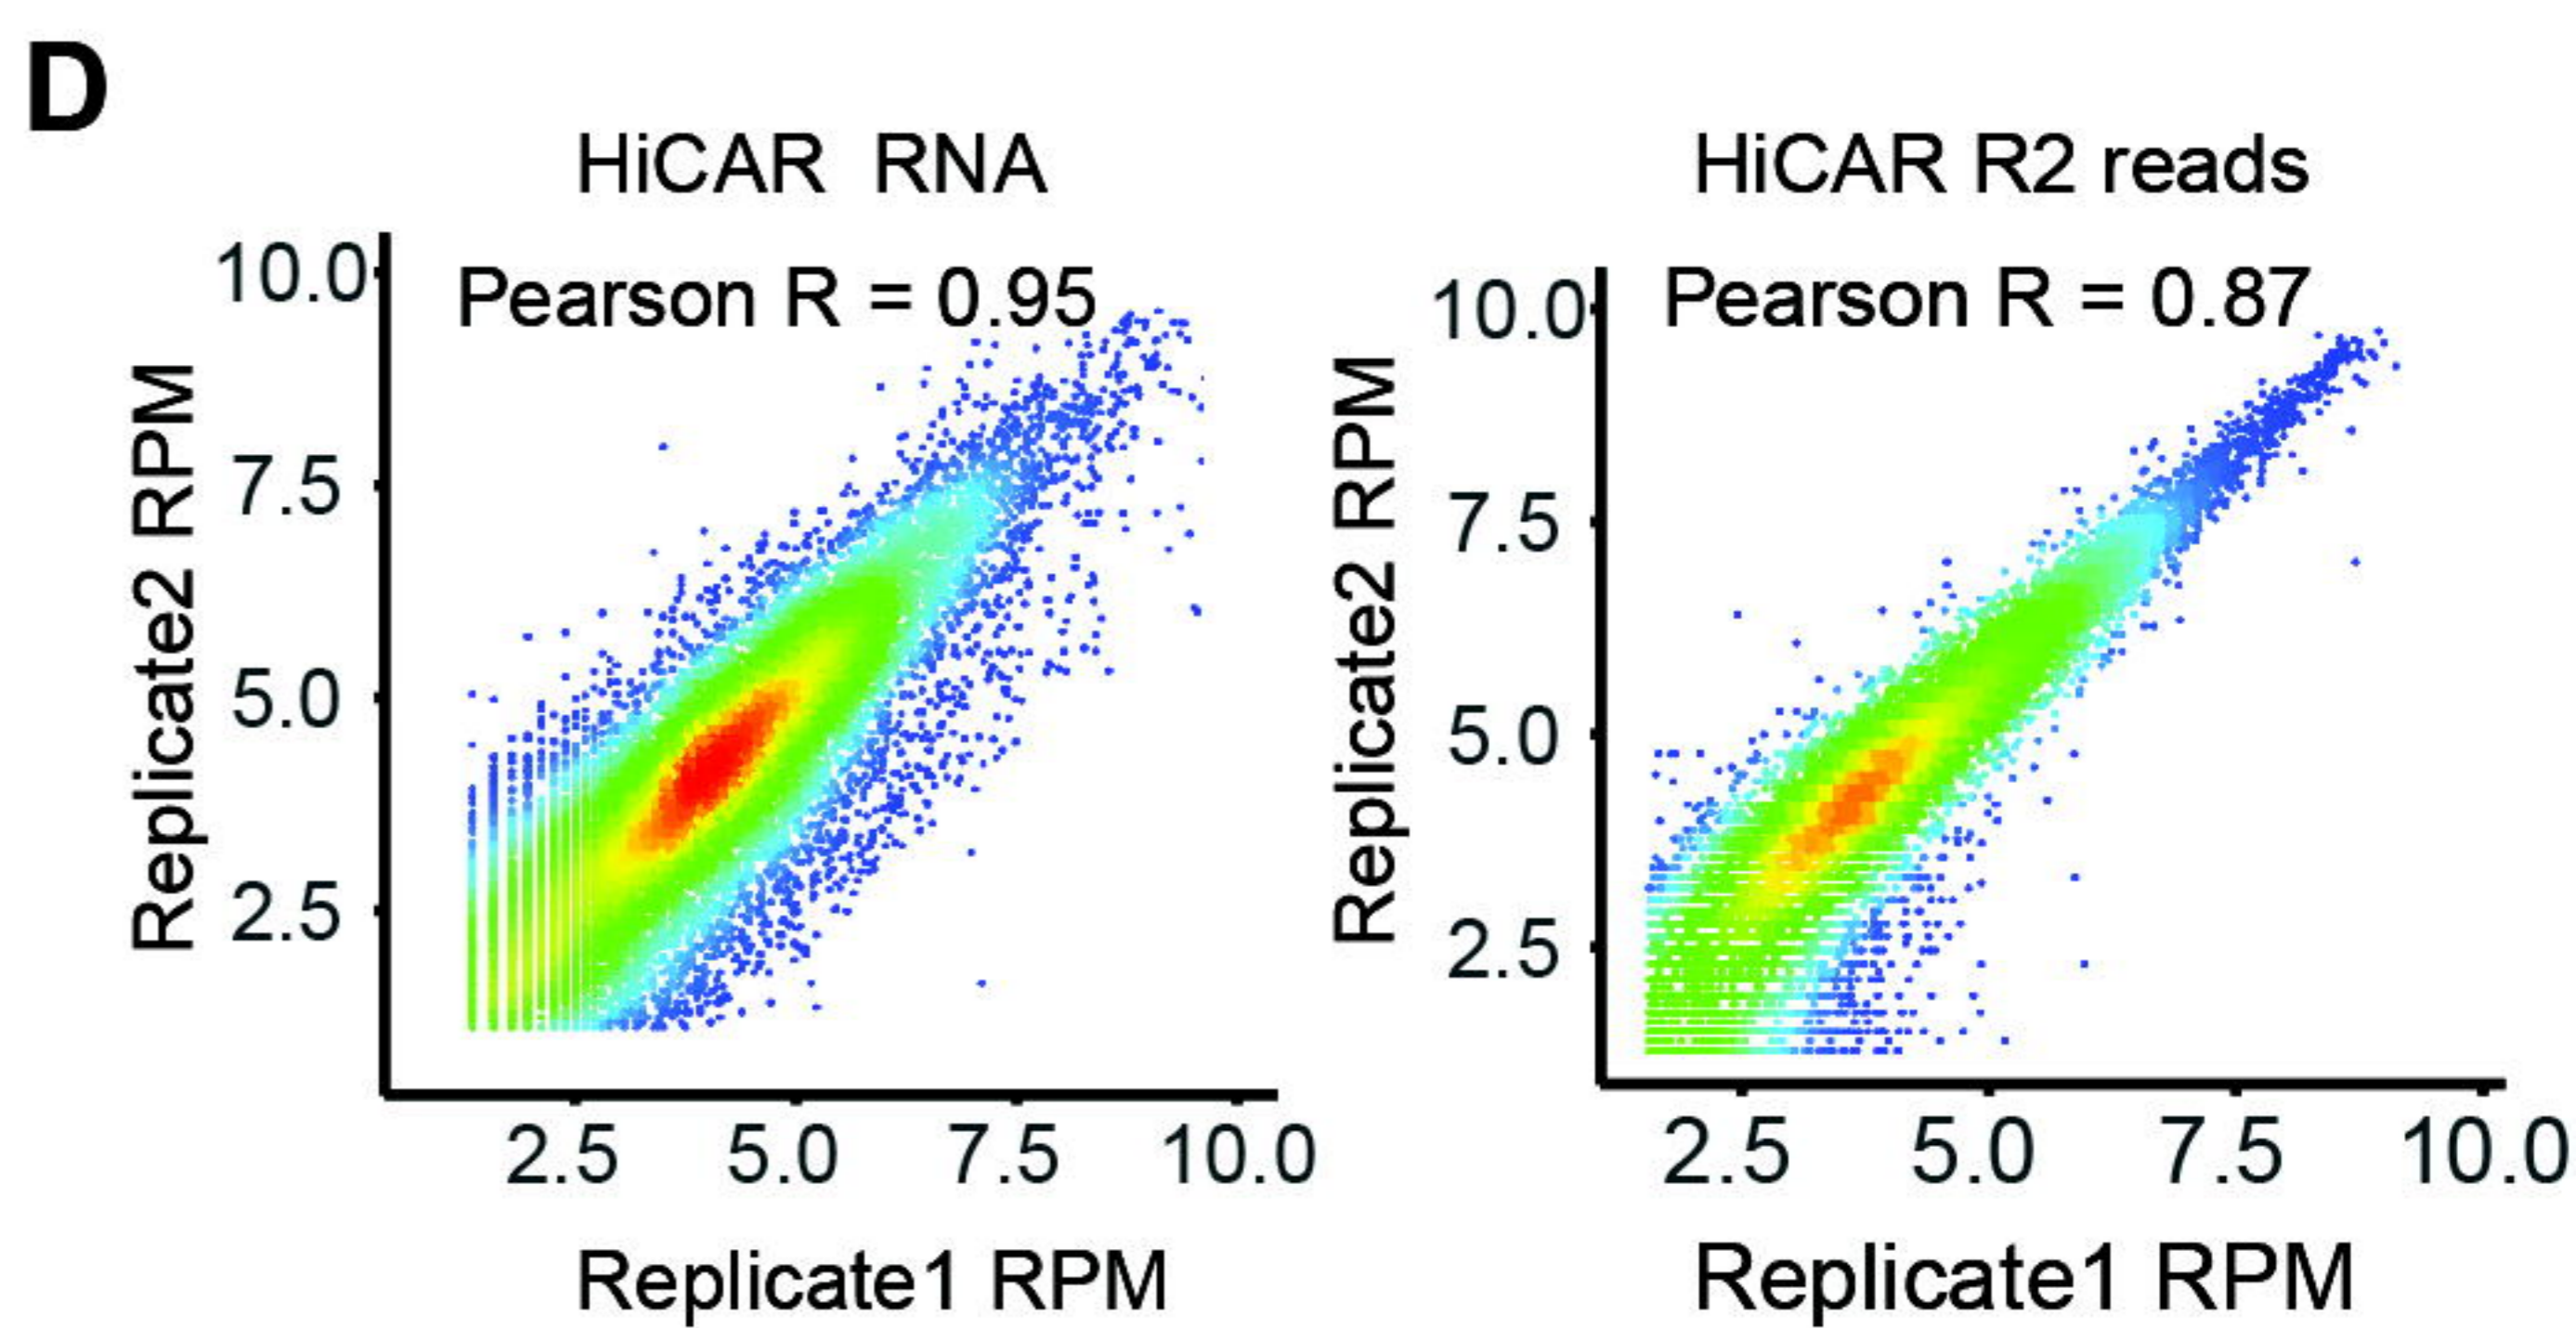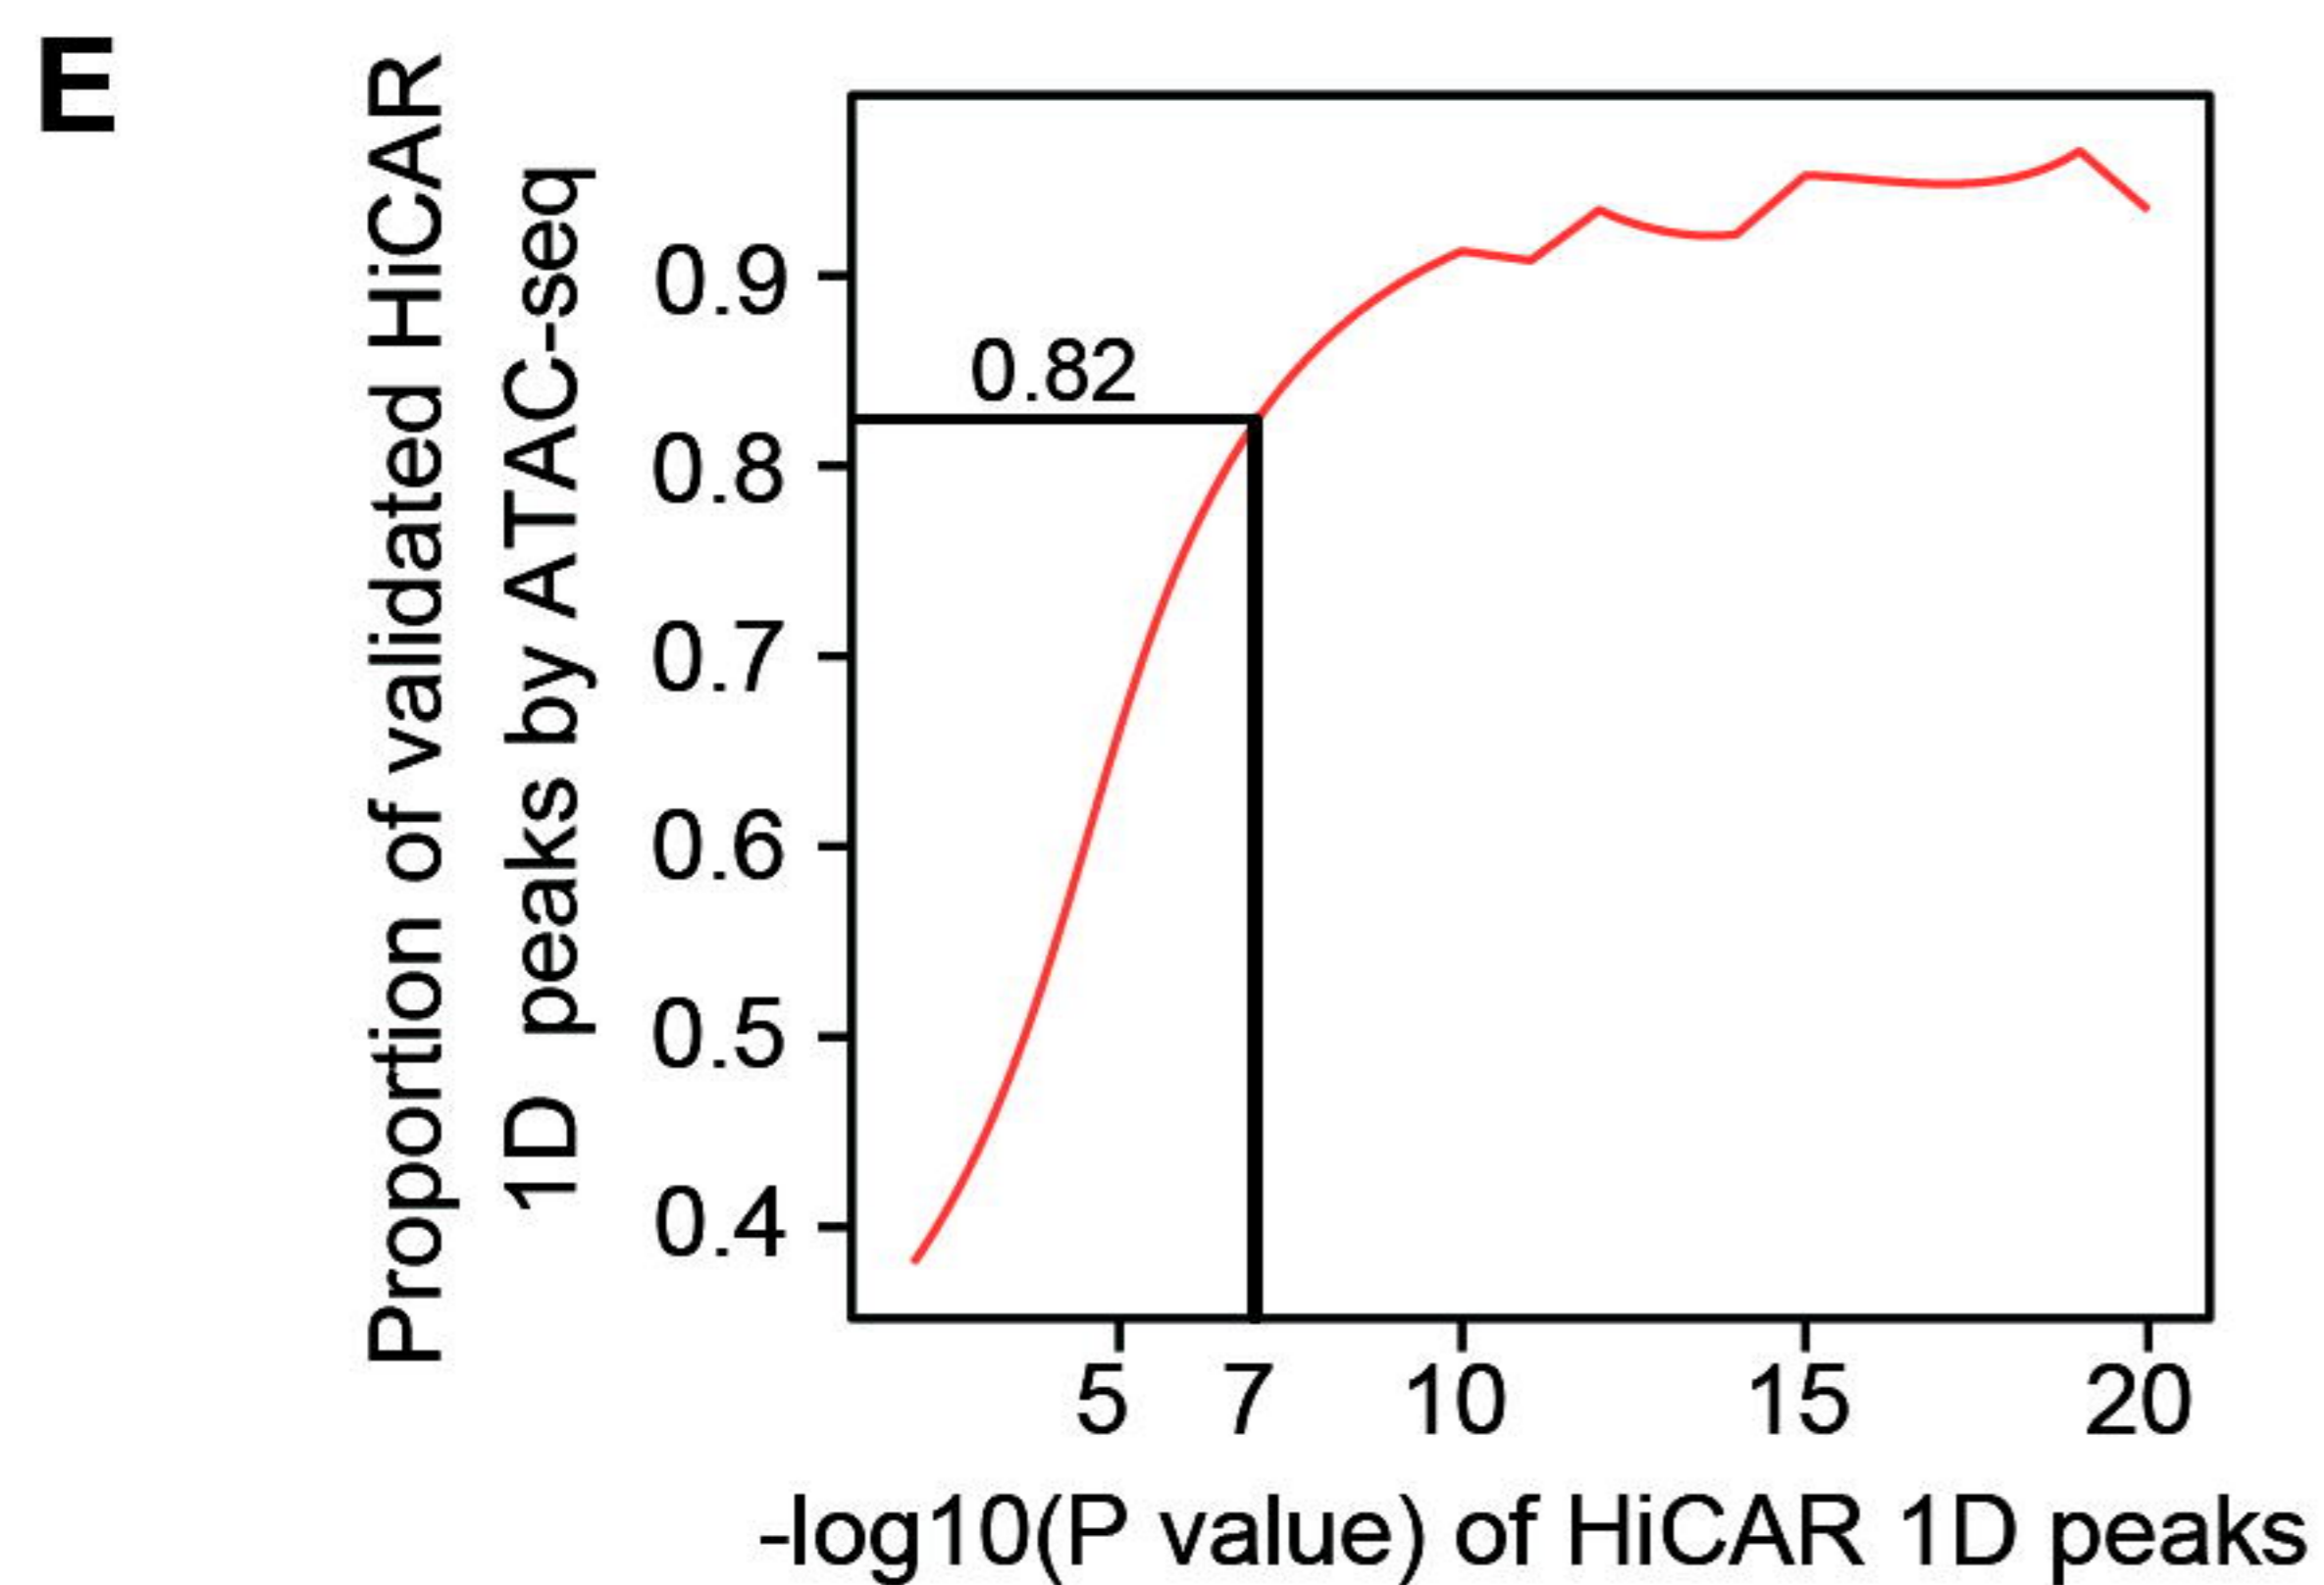

## Supplementary Figure 2

A GO of H3K27ac interactions associated genes

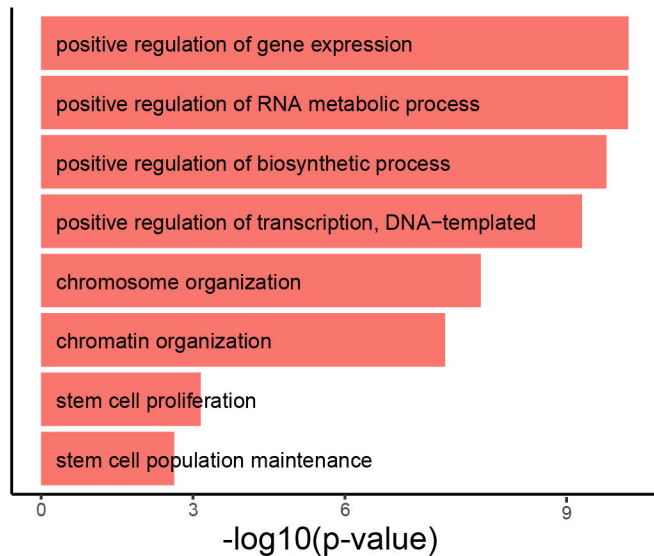

B GO of H3K27me3 interactions associated genes

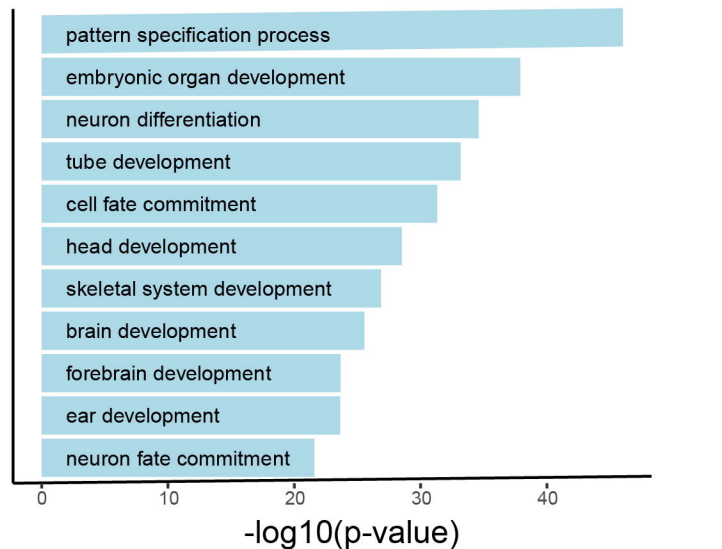

# Supplementary Figure 3

**A**

Expression of genes located on  
HiCAR interaction anchors

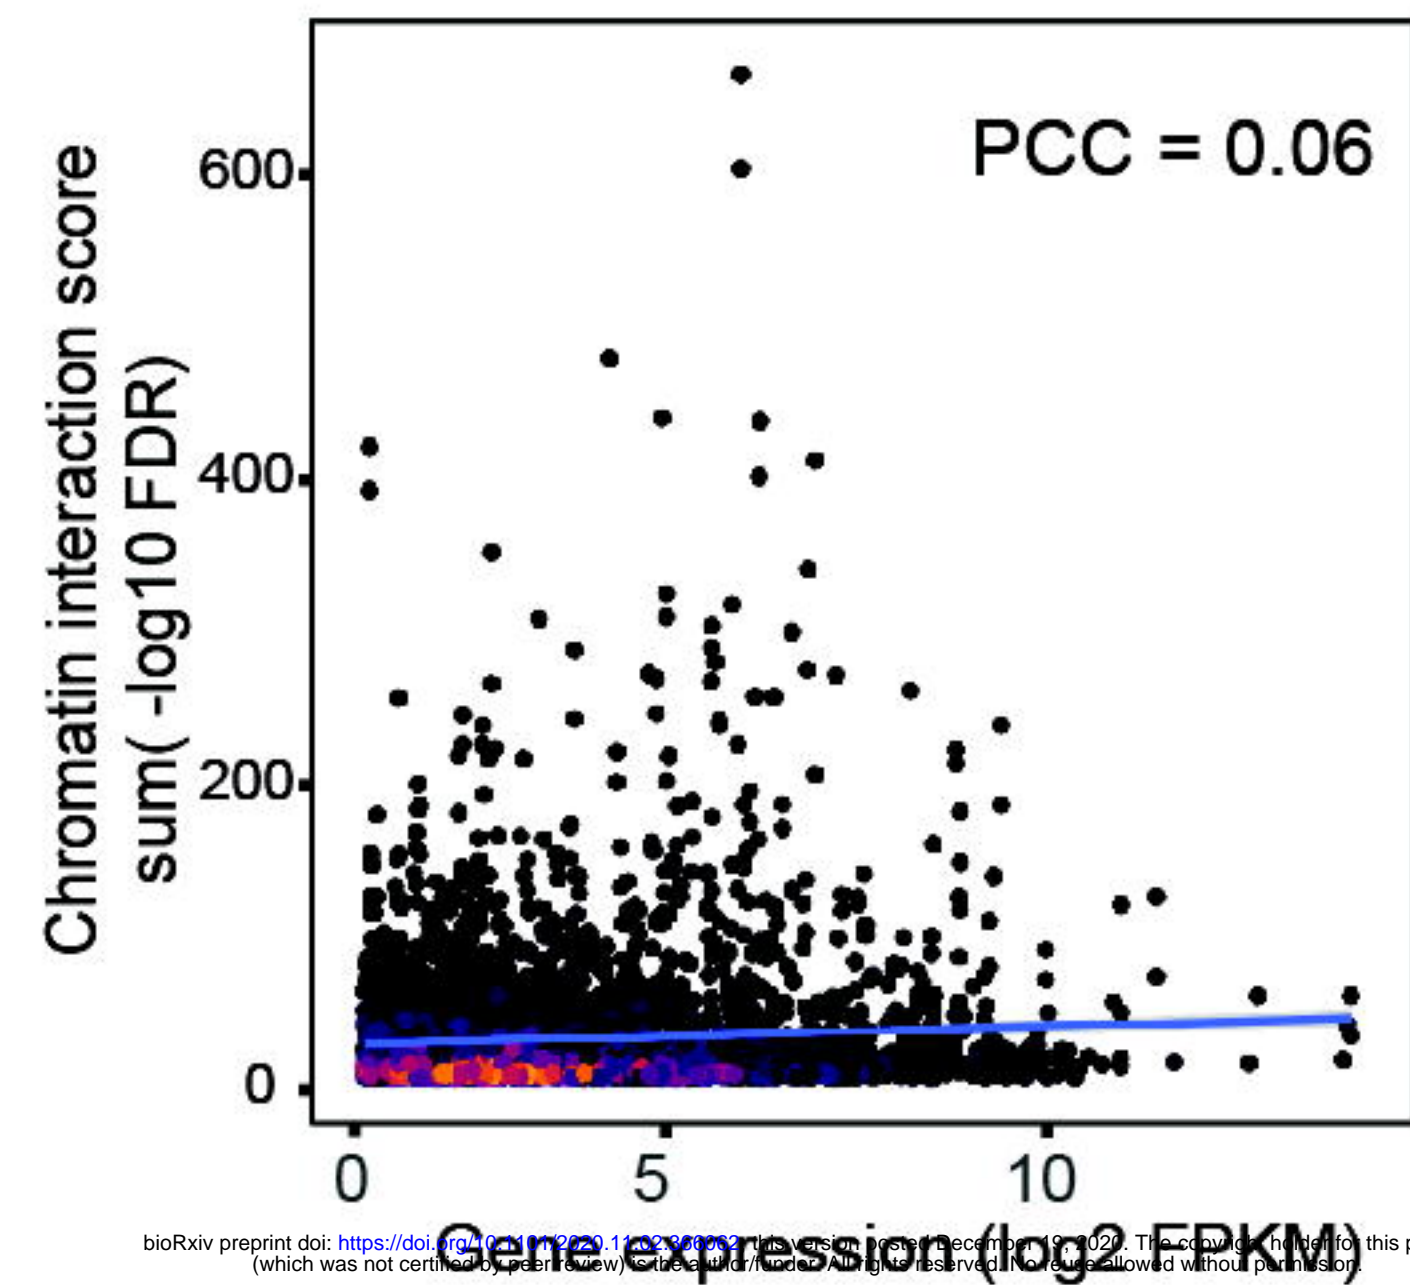**B**

H3K27ac ChIP-seq signal  
on HiCAR interaction anchors

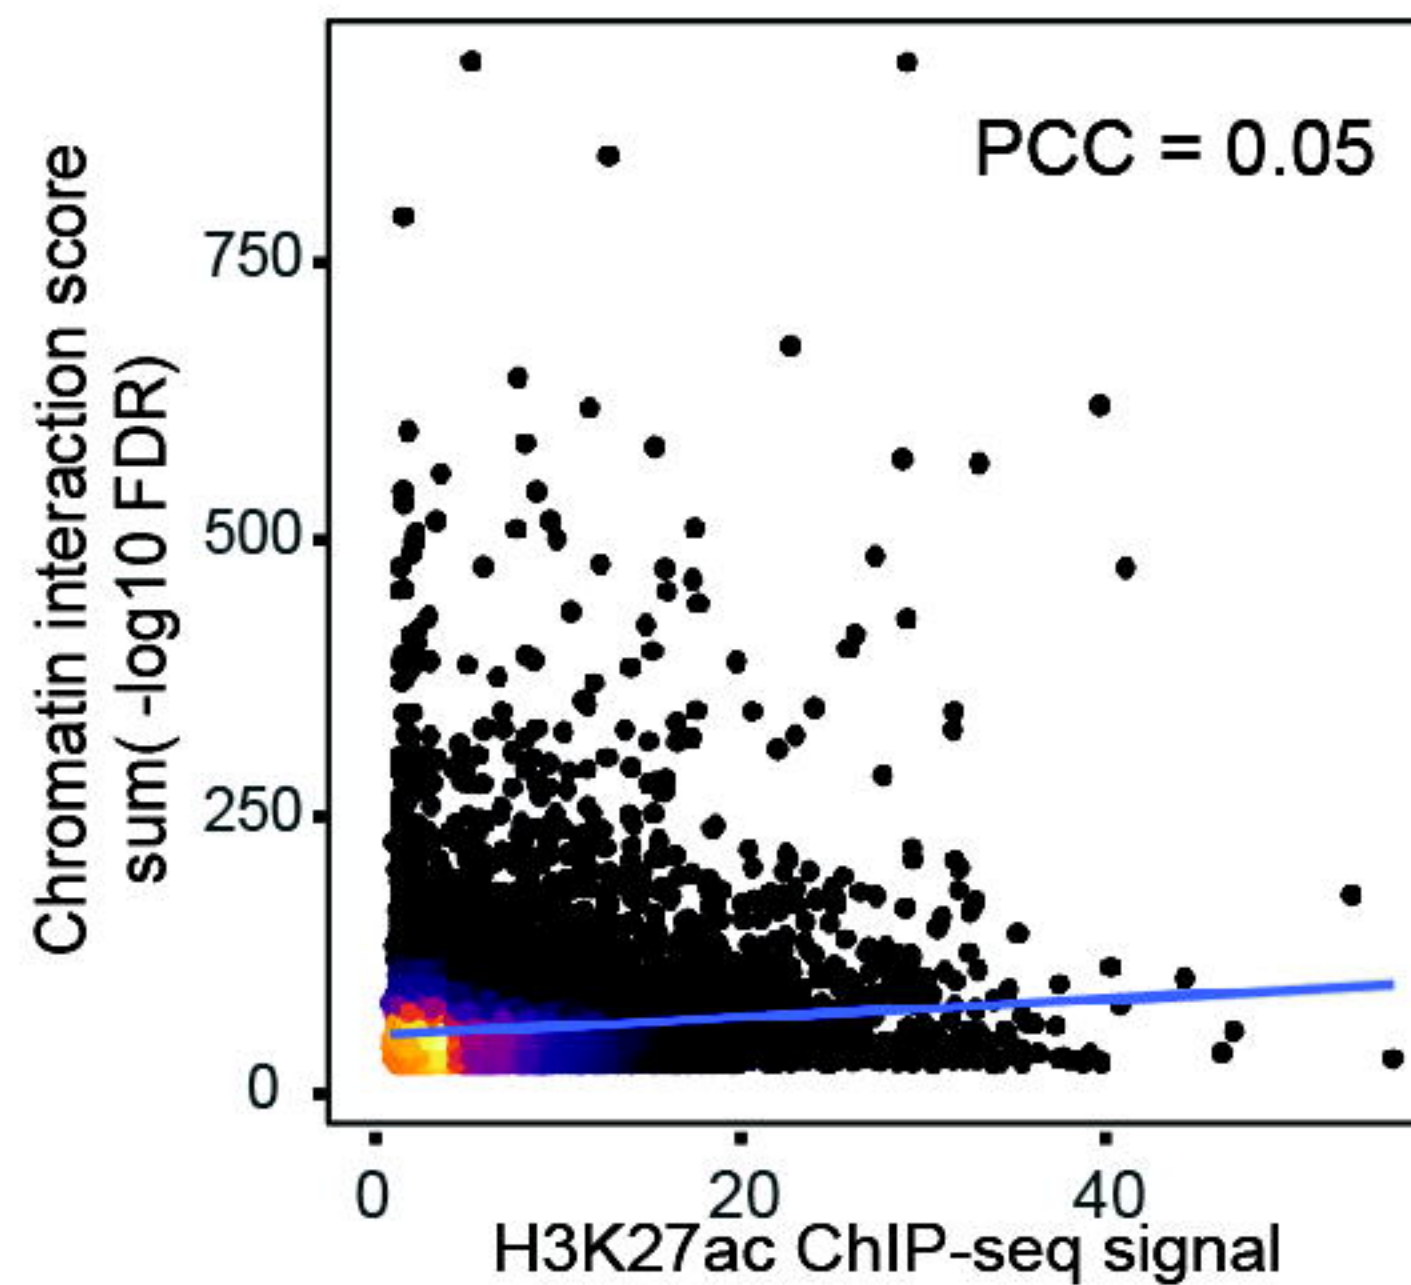**C**

ATAC-seq signal on  
HiCAR interaction anchors

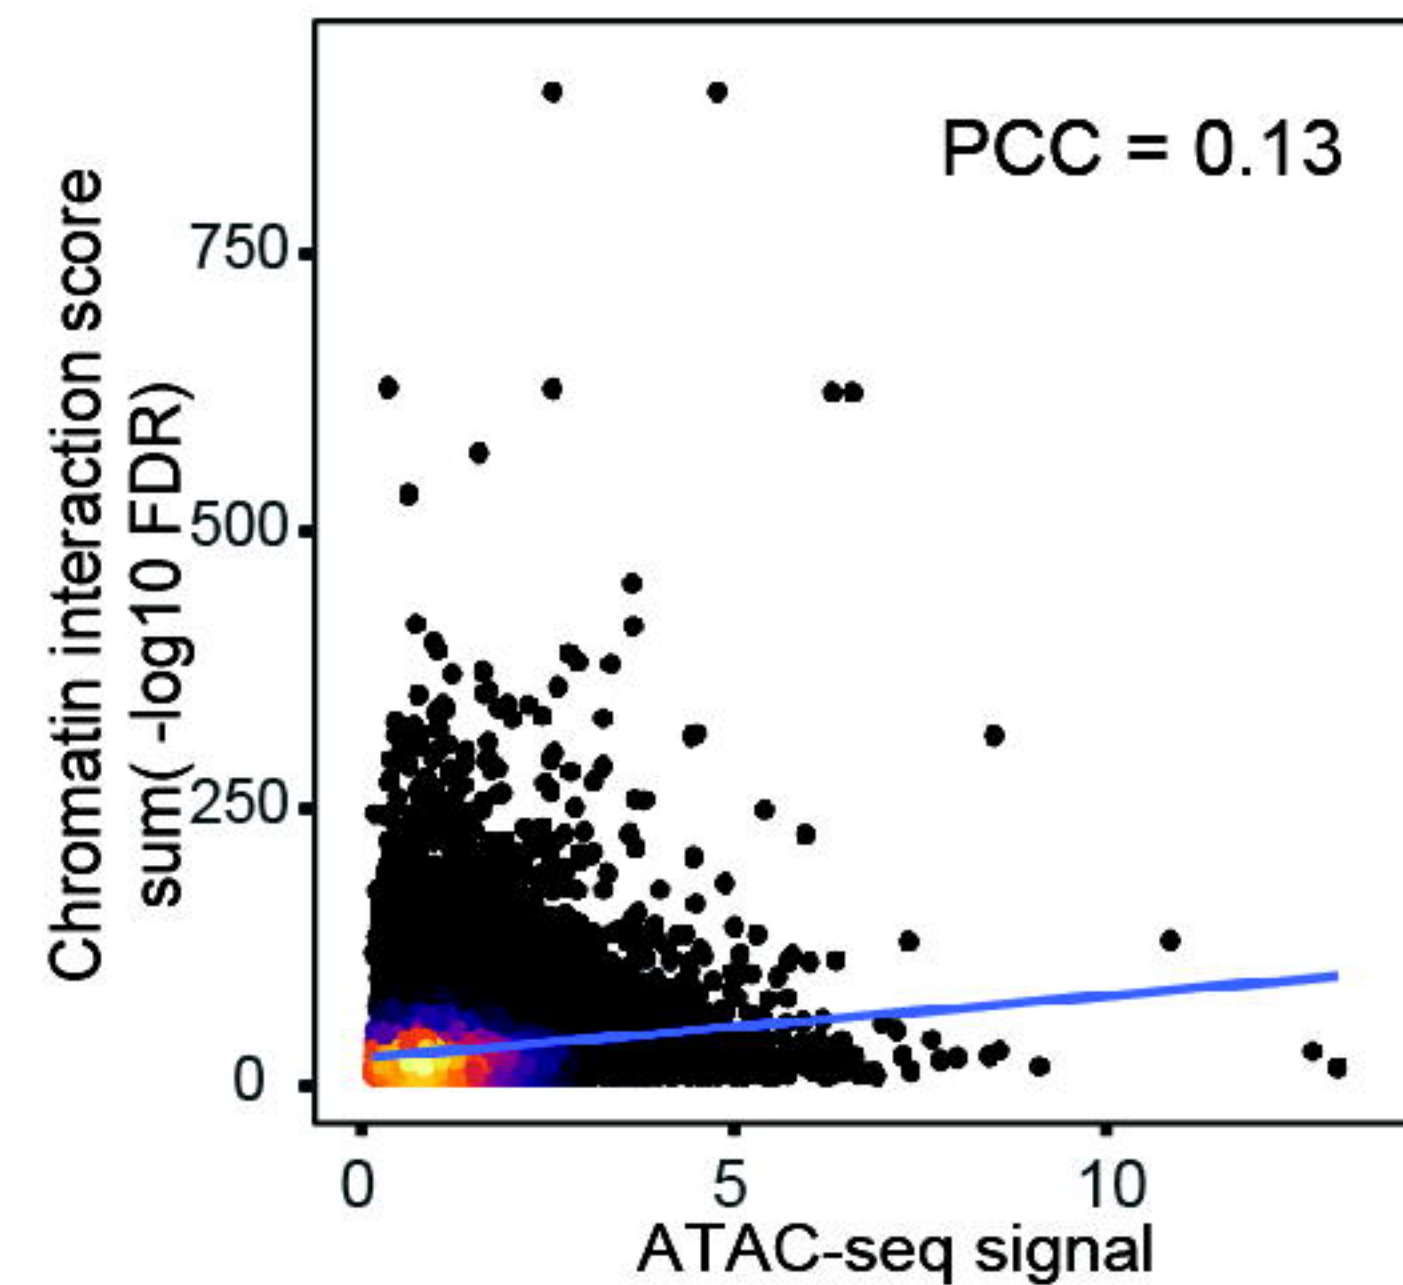**D**

mRNA level expressed from gene promoters  
located on HiCAR anchors

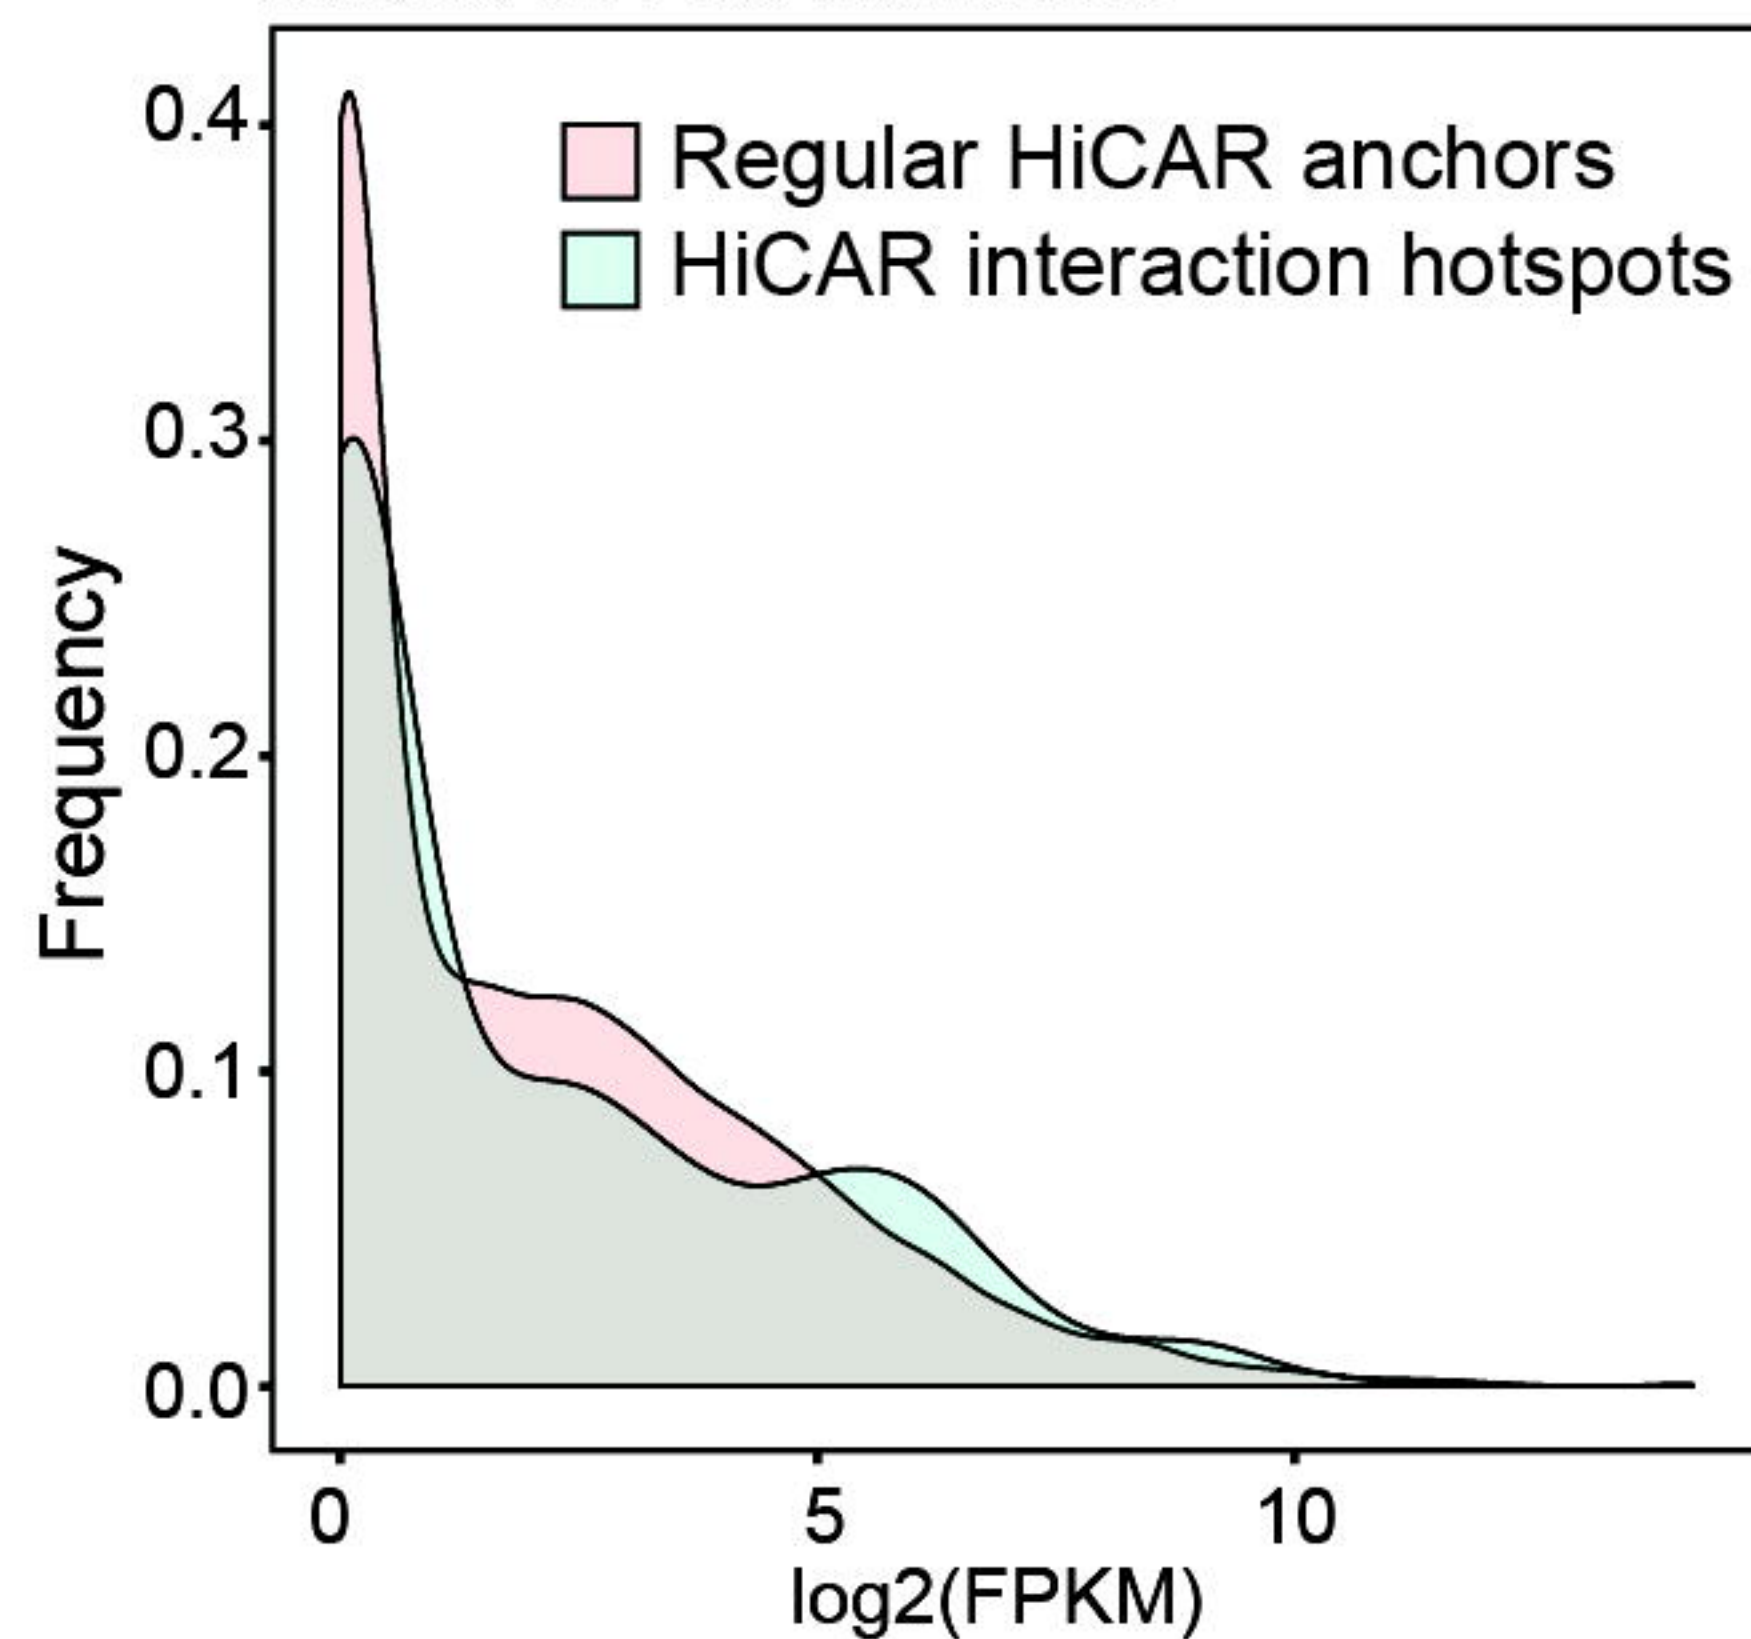**E**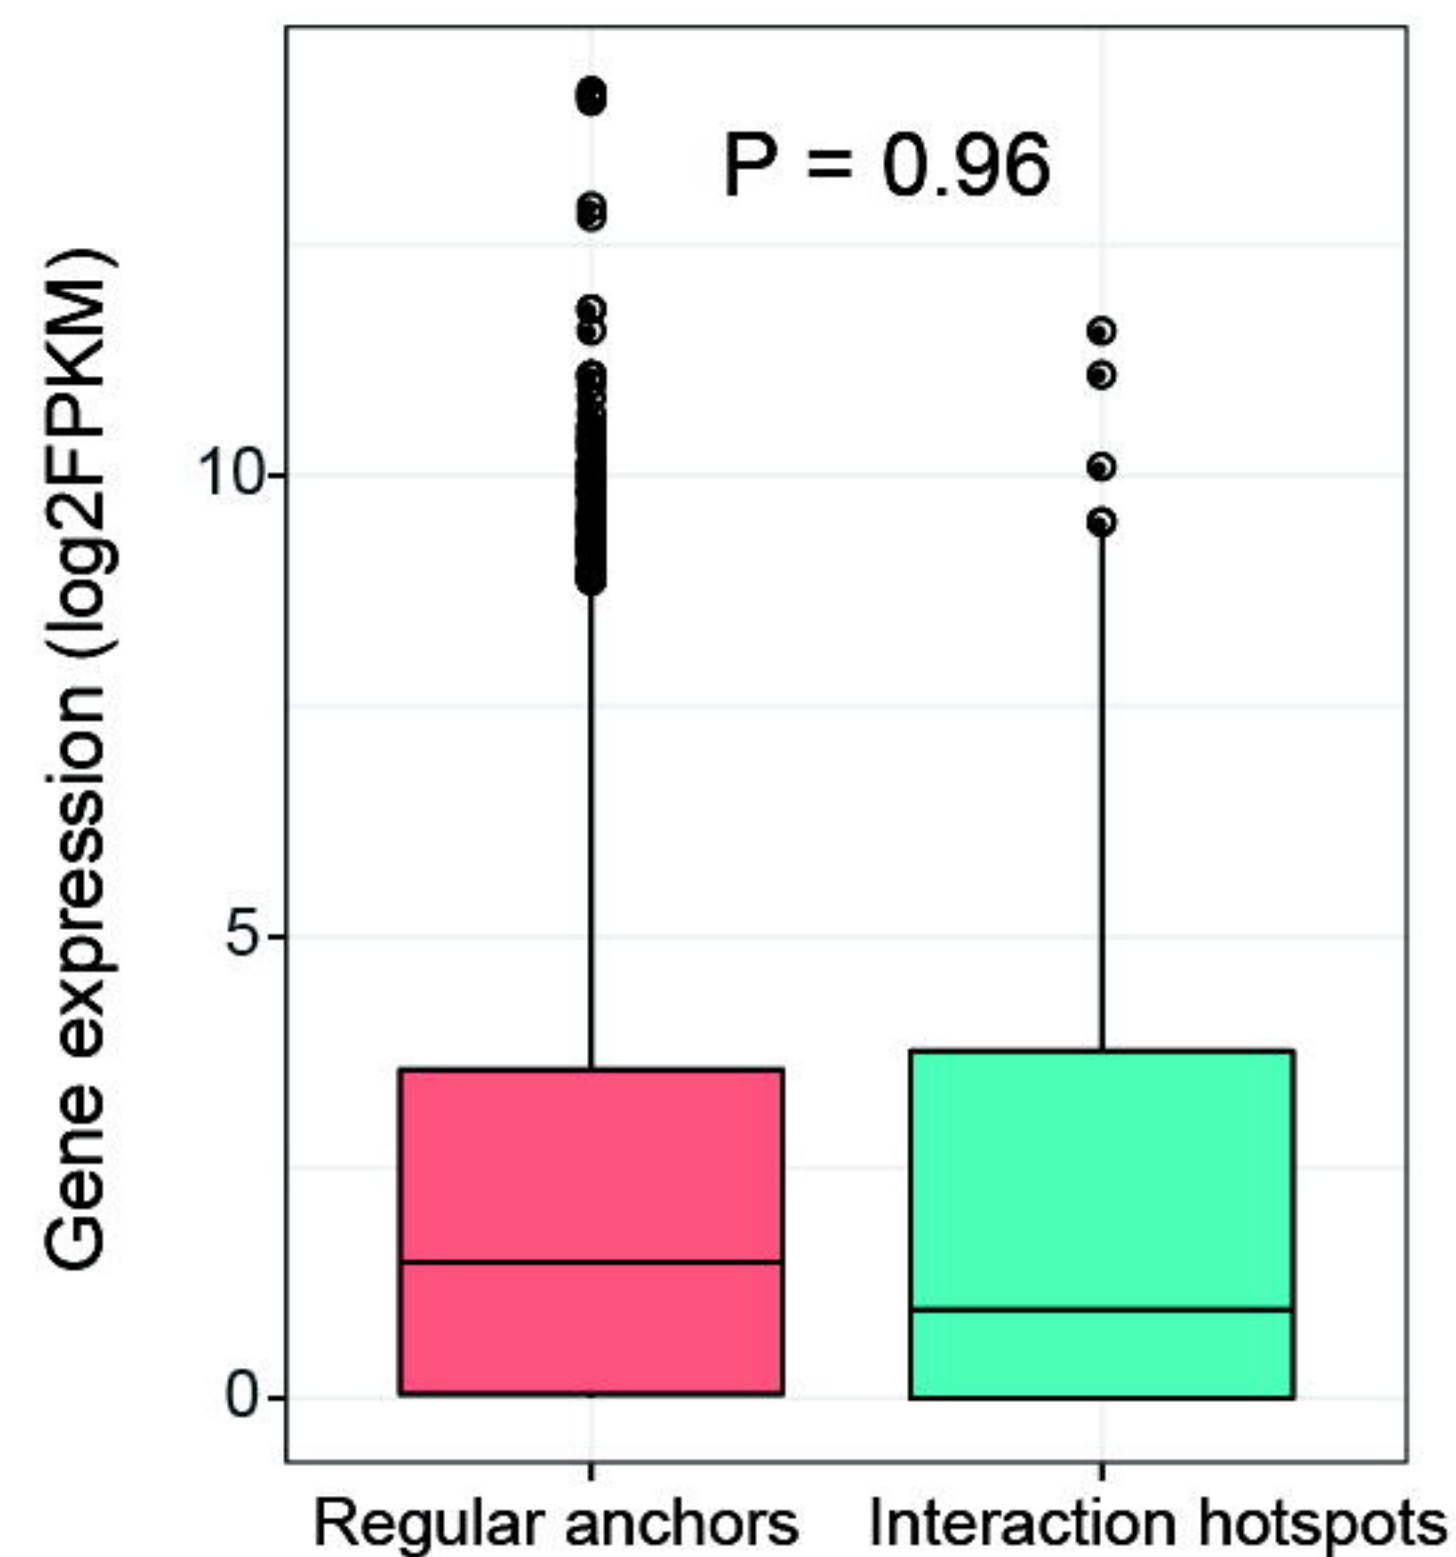

# Supplementary Figure 4

**A**

## Decision\_tree

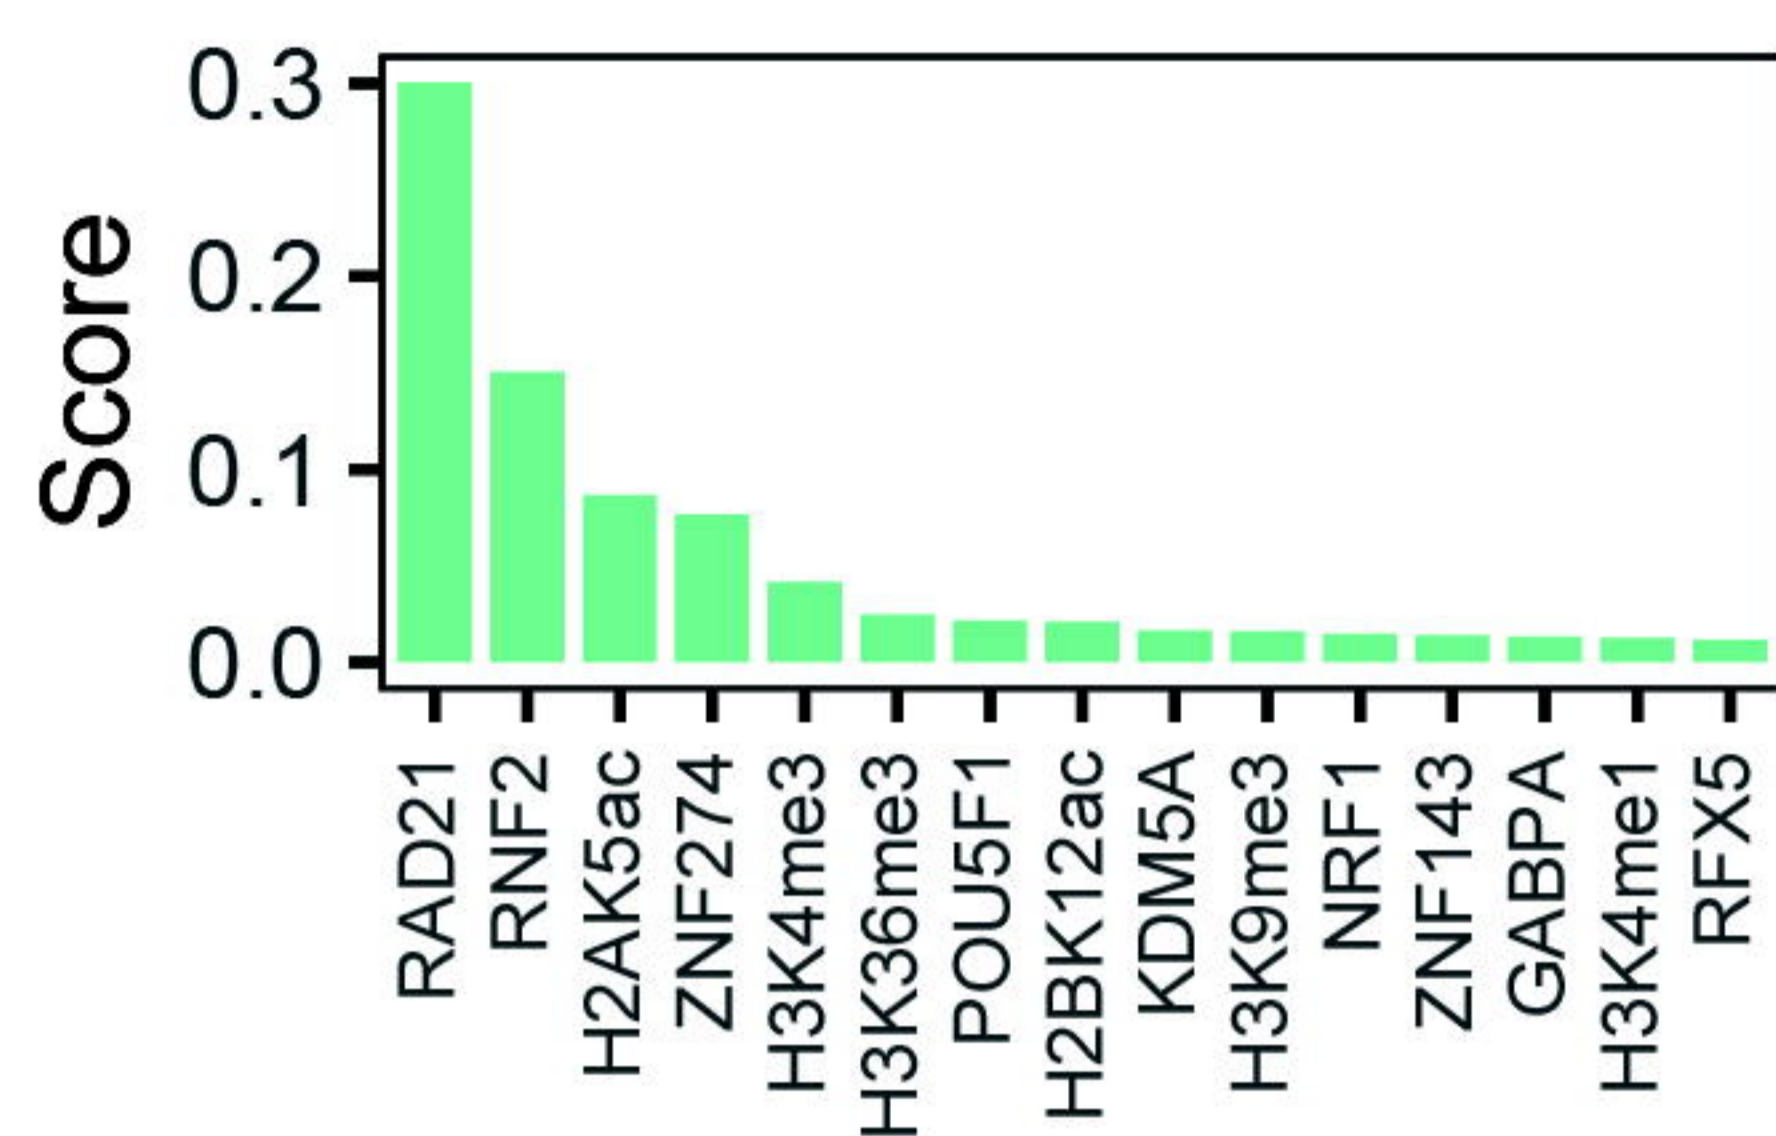

## Linear\_regression

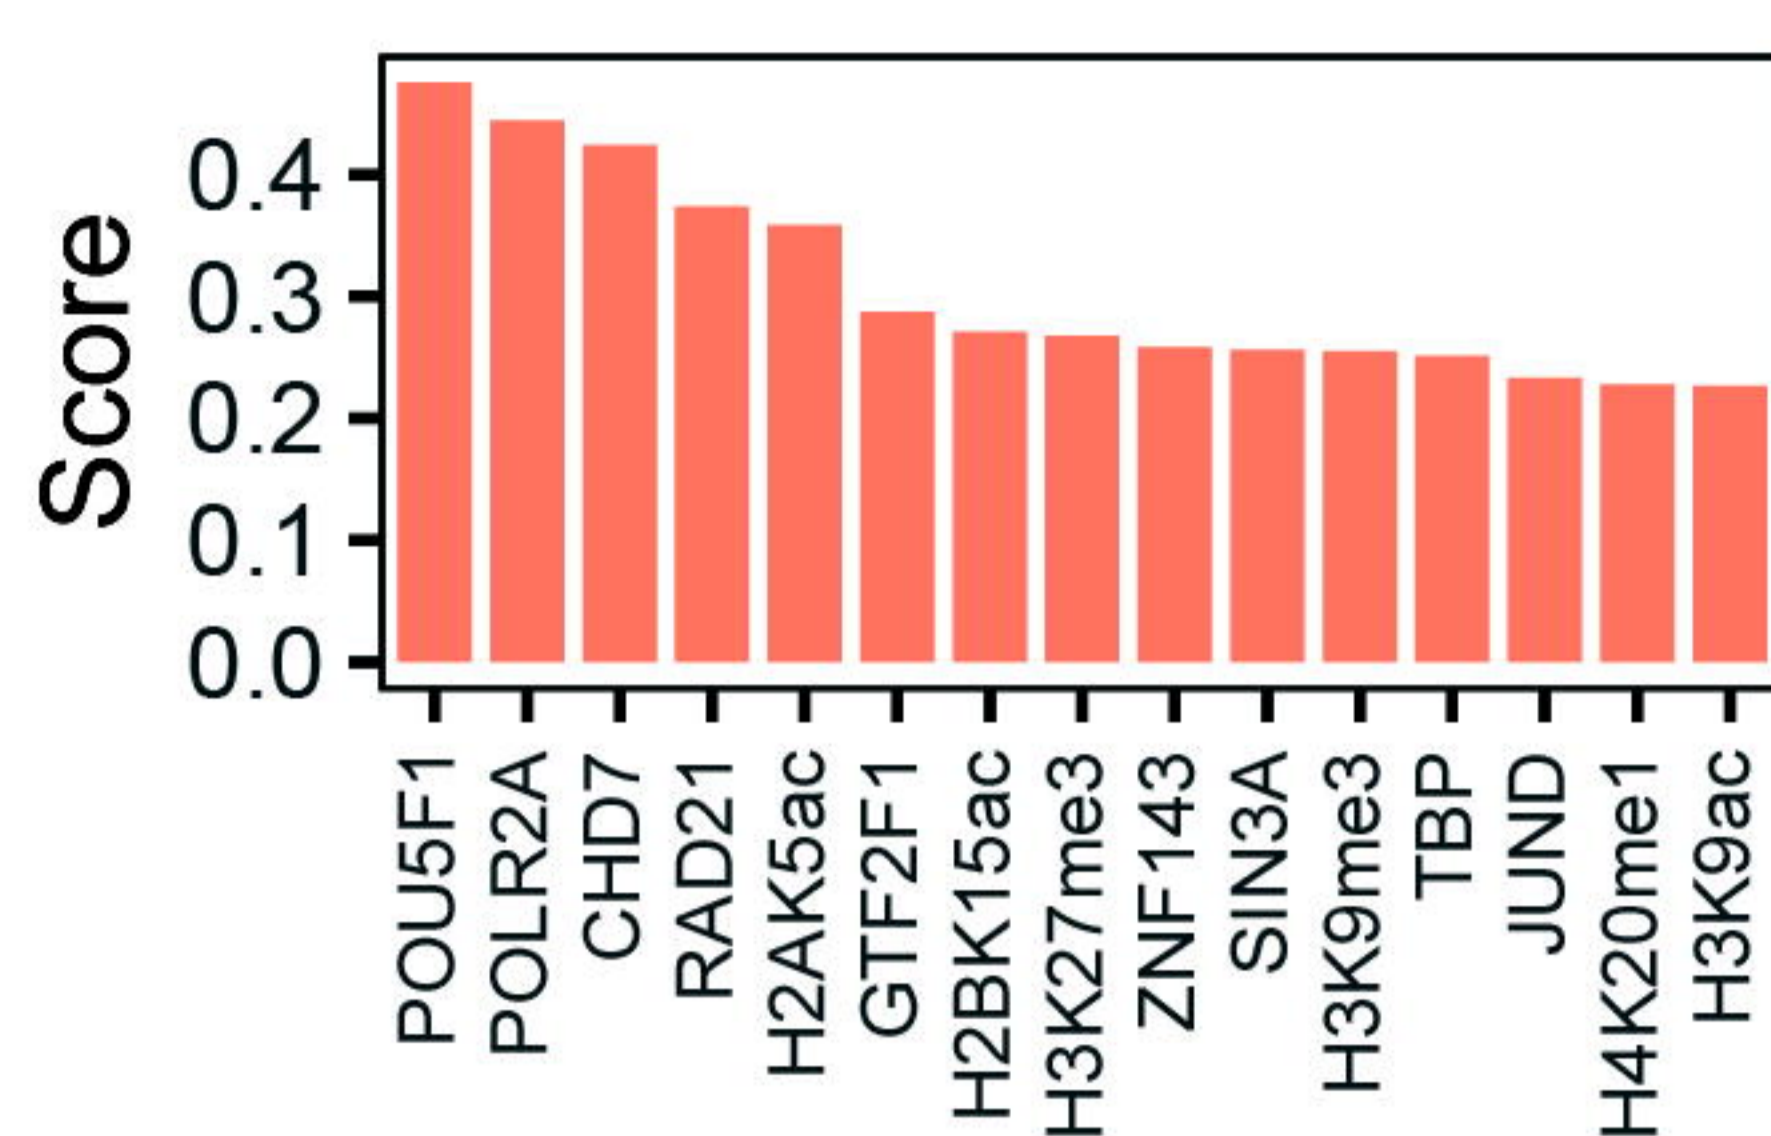

## Linear\_svm

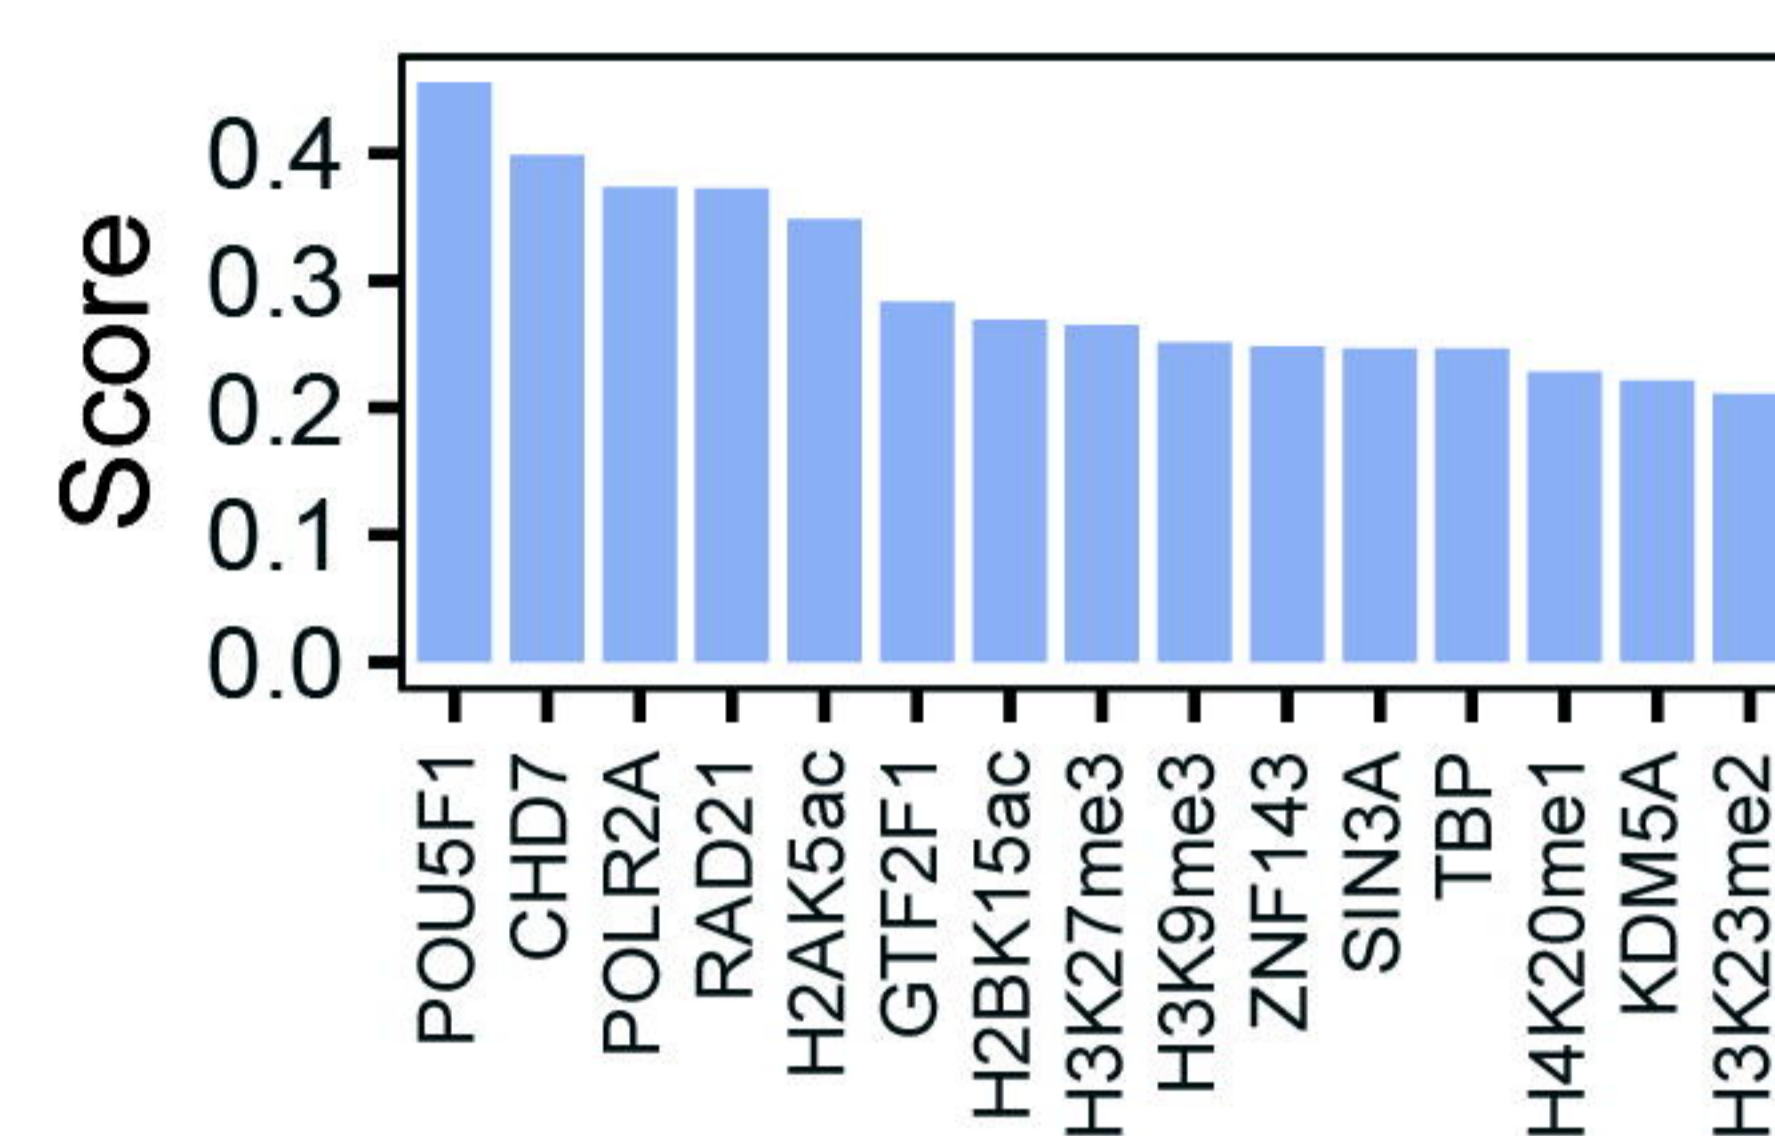

## Random Forest

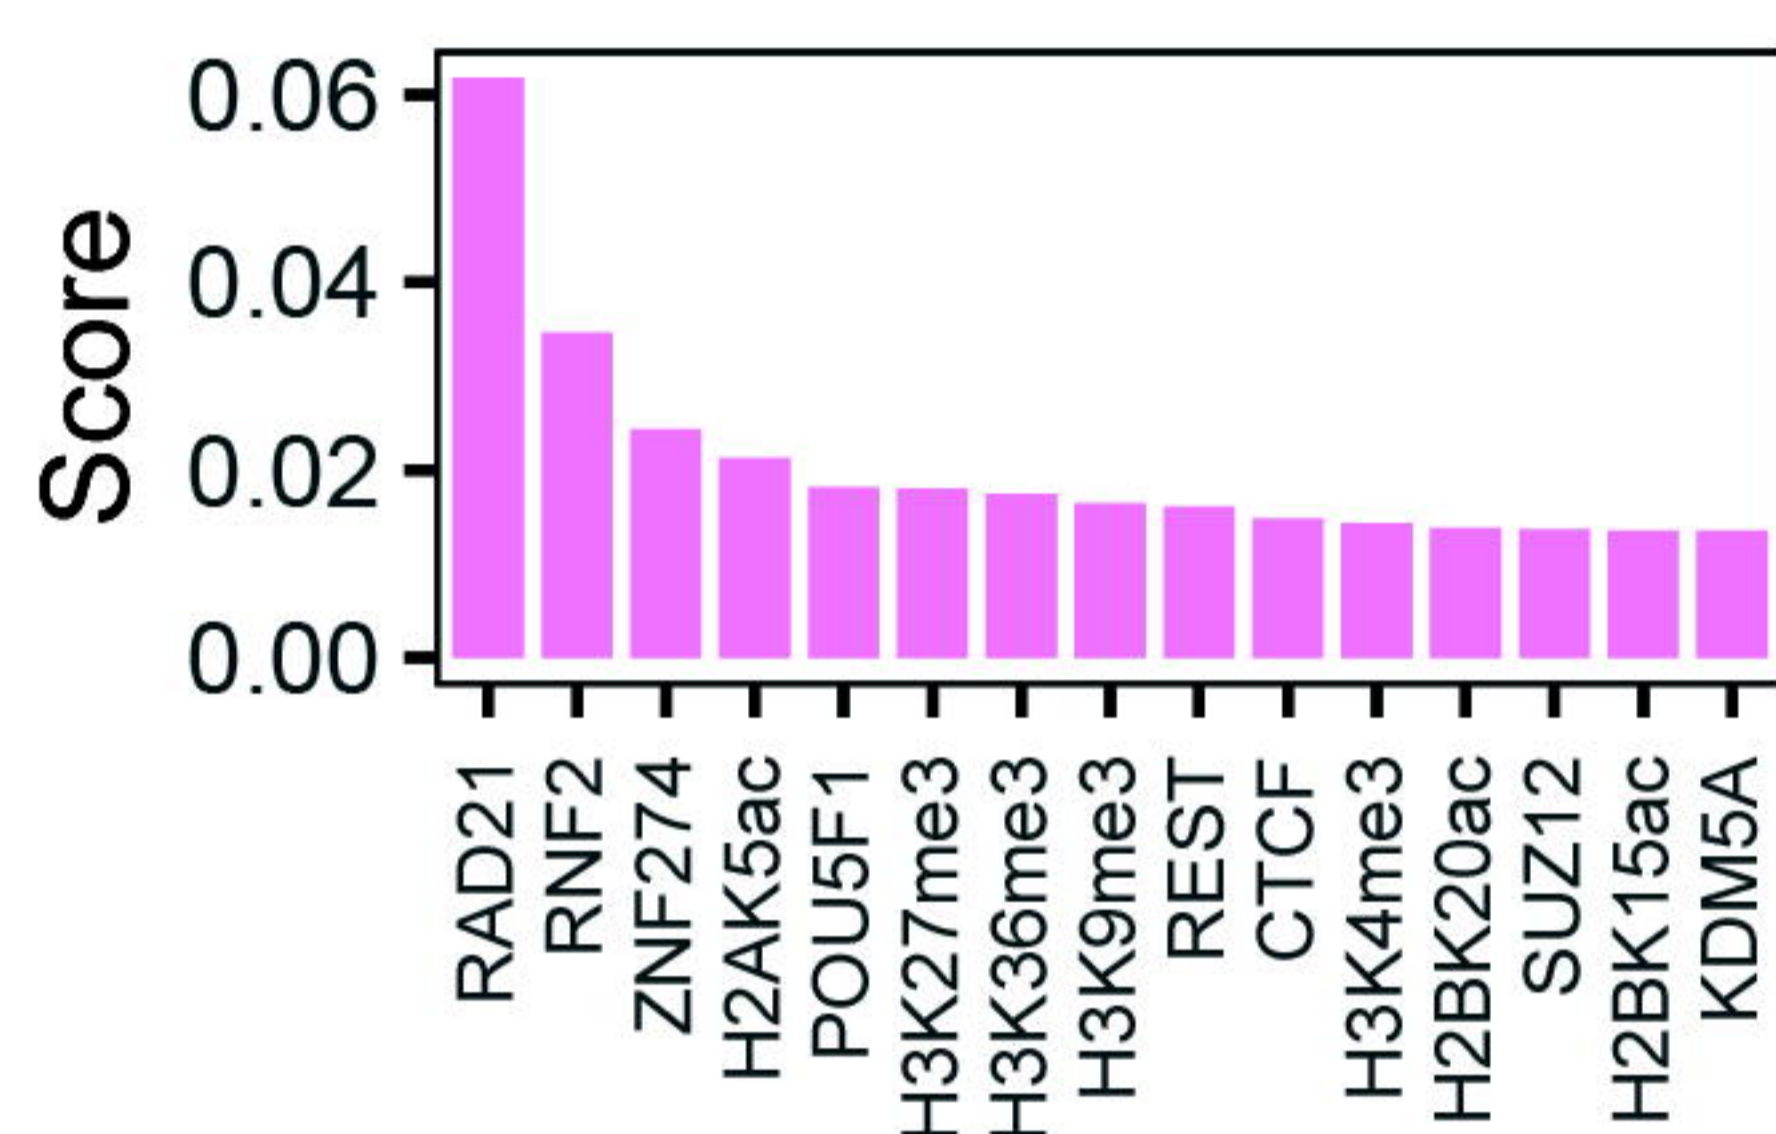

## XGBoost

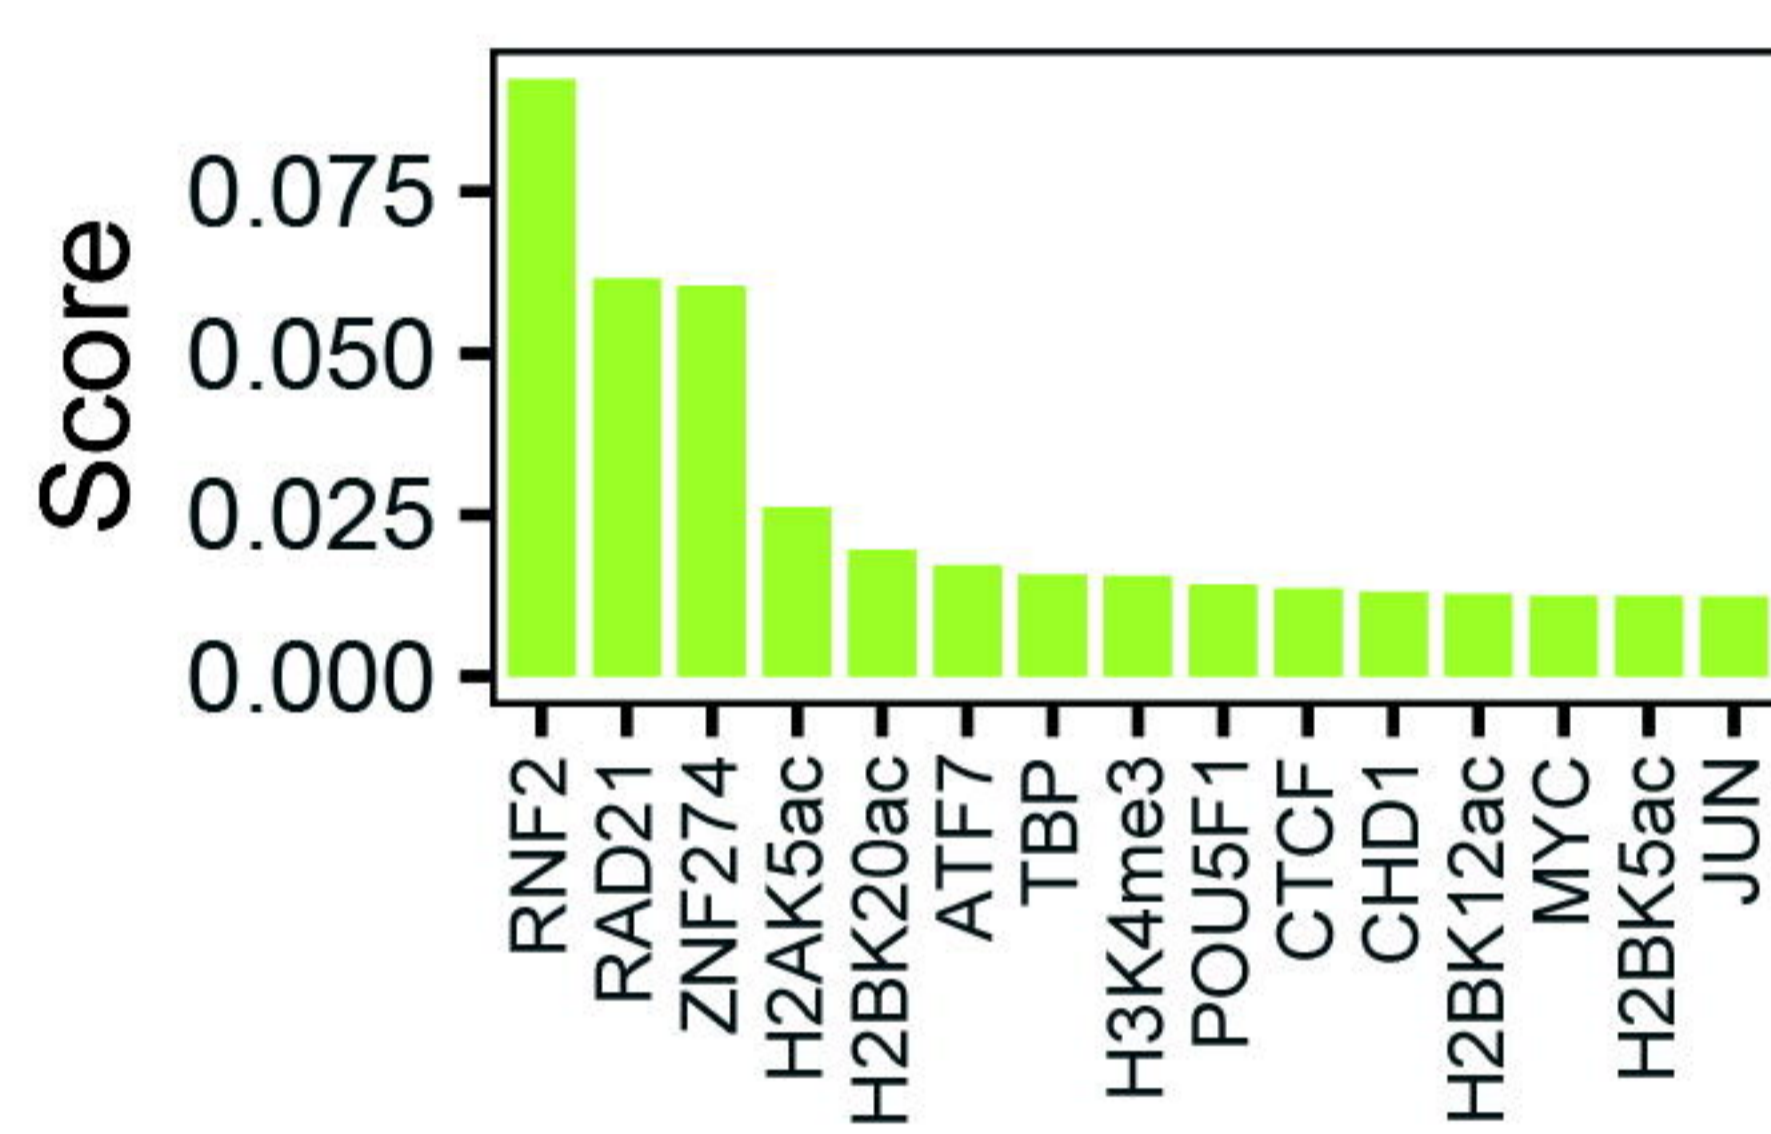

**B**

## mean\_absolute\_error

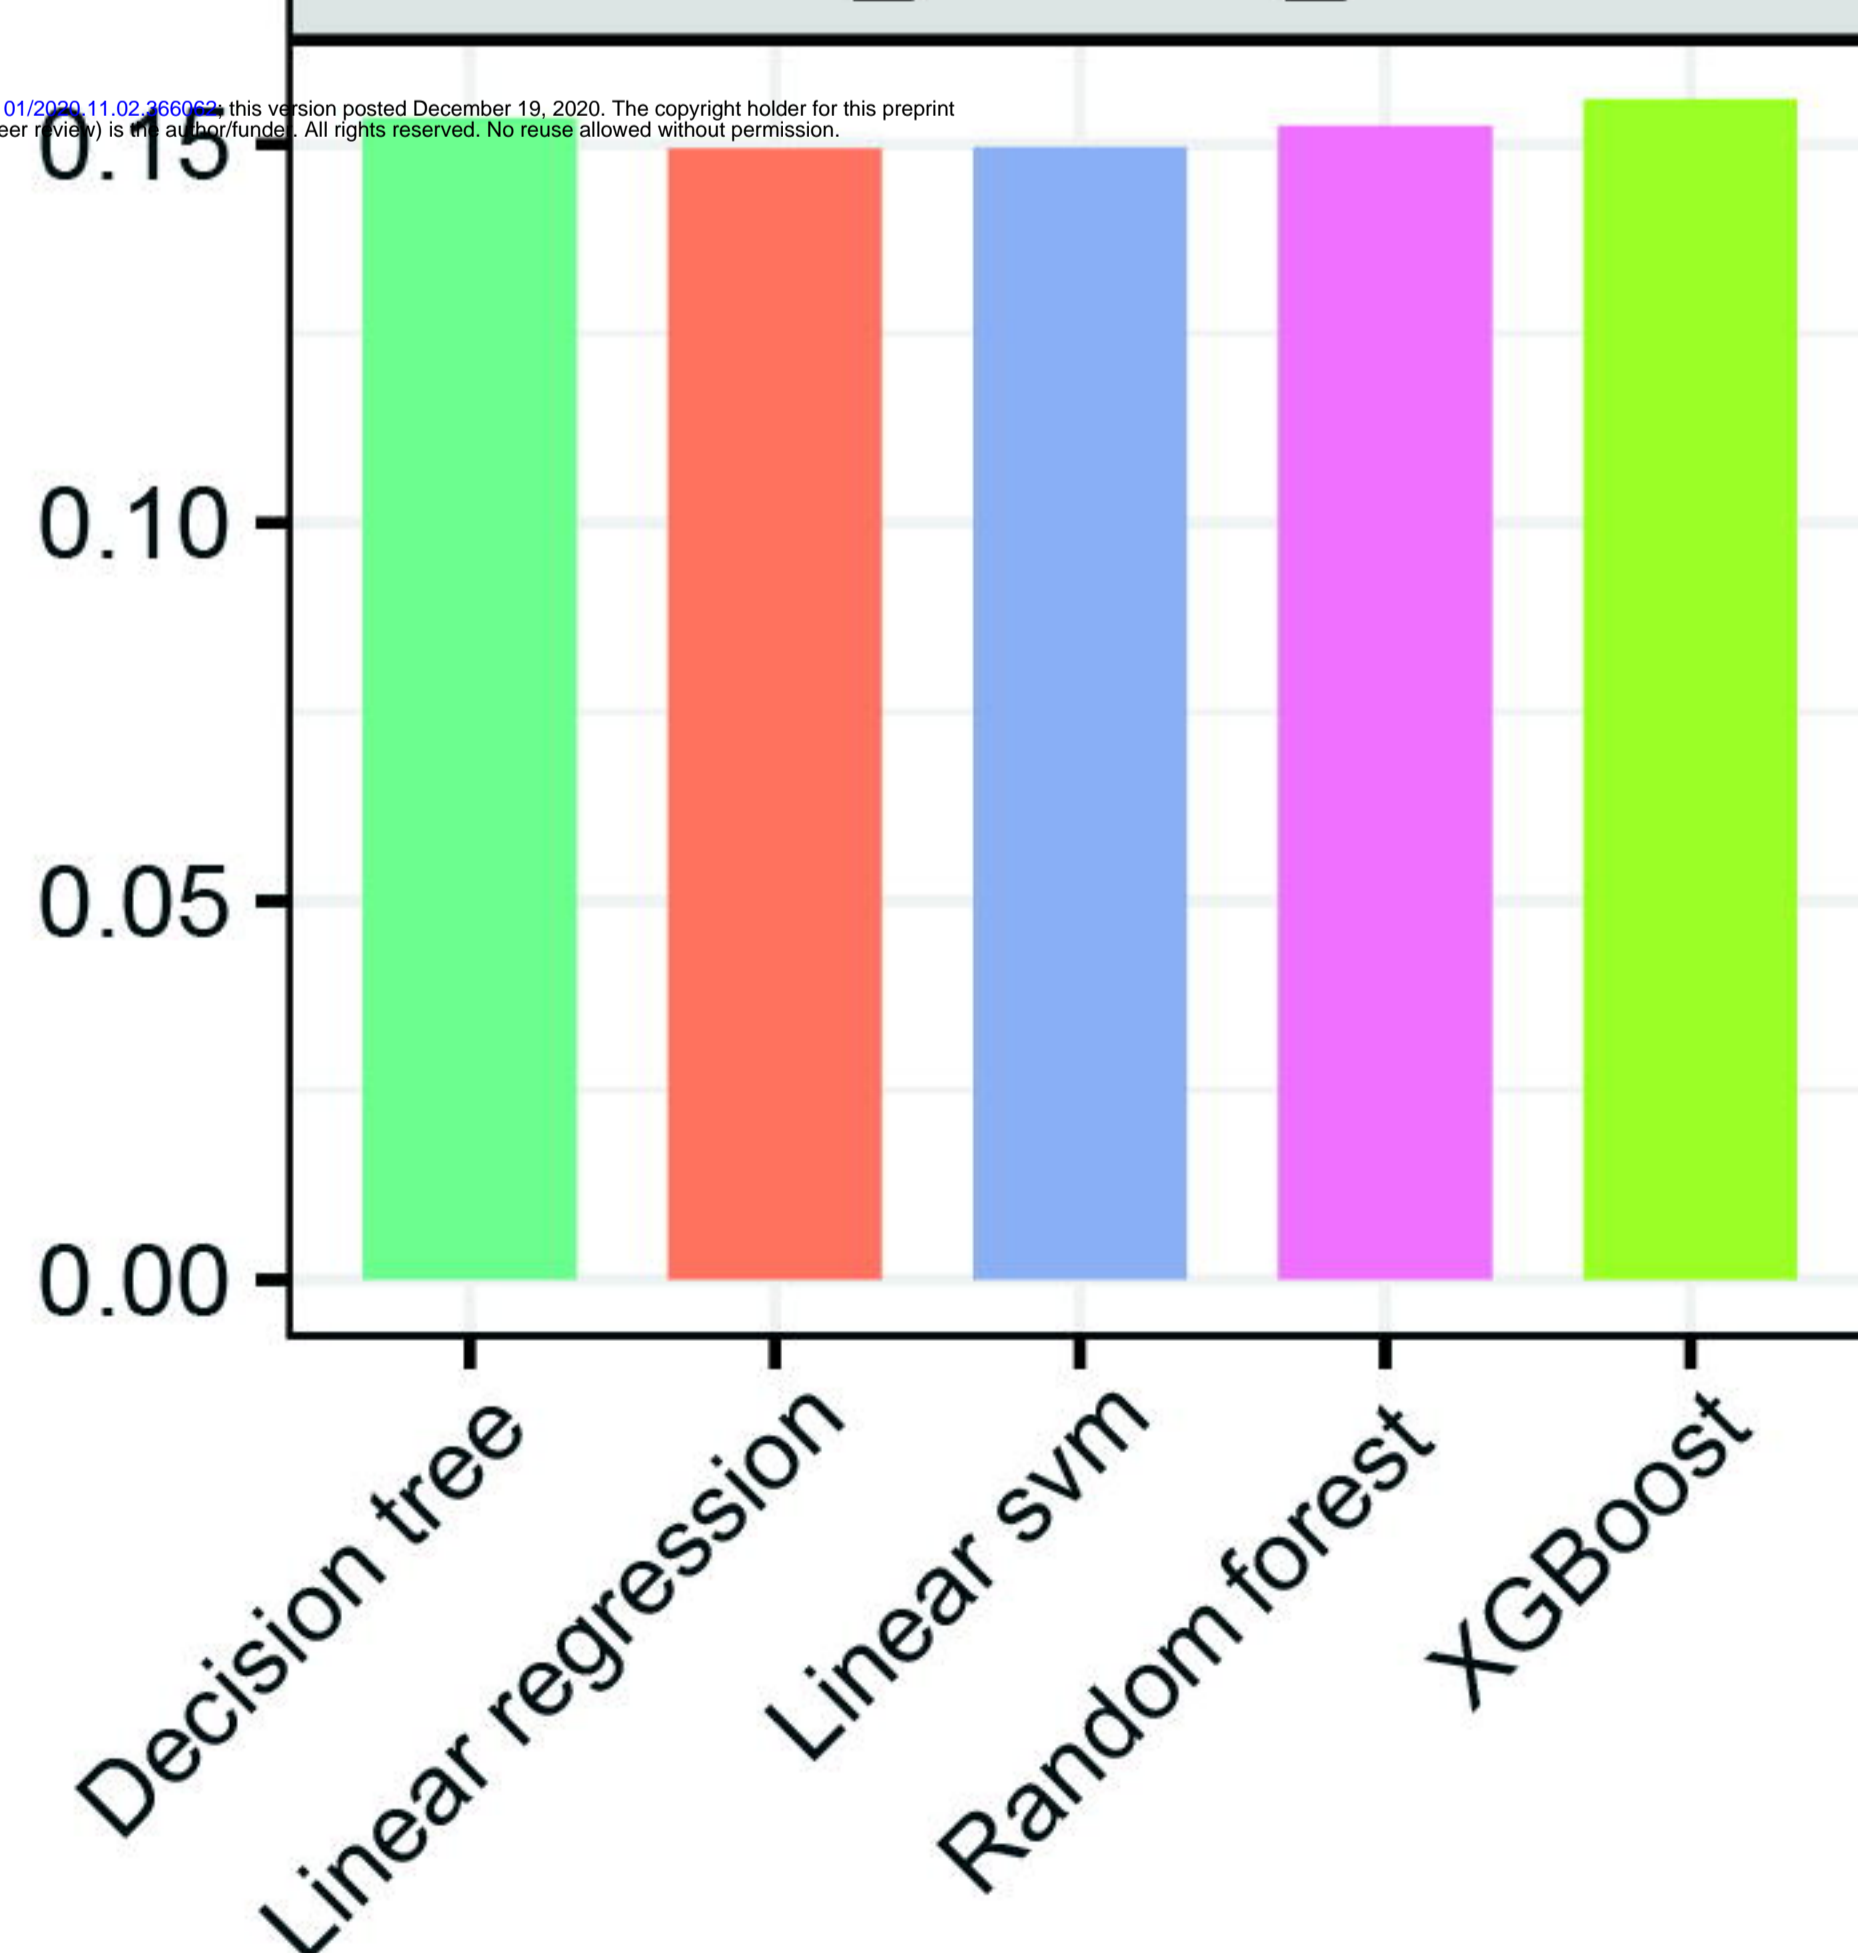

## mean\_squared\_error

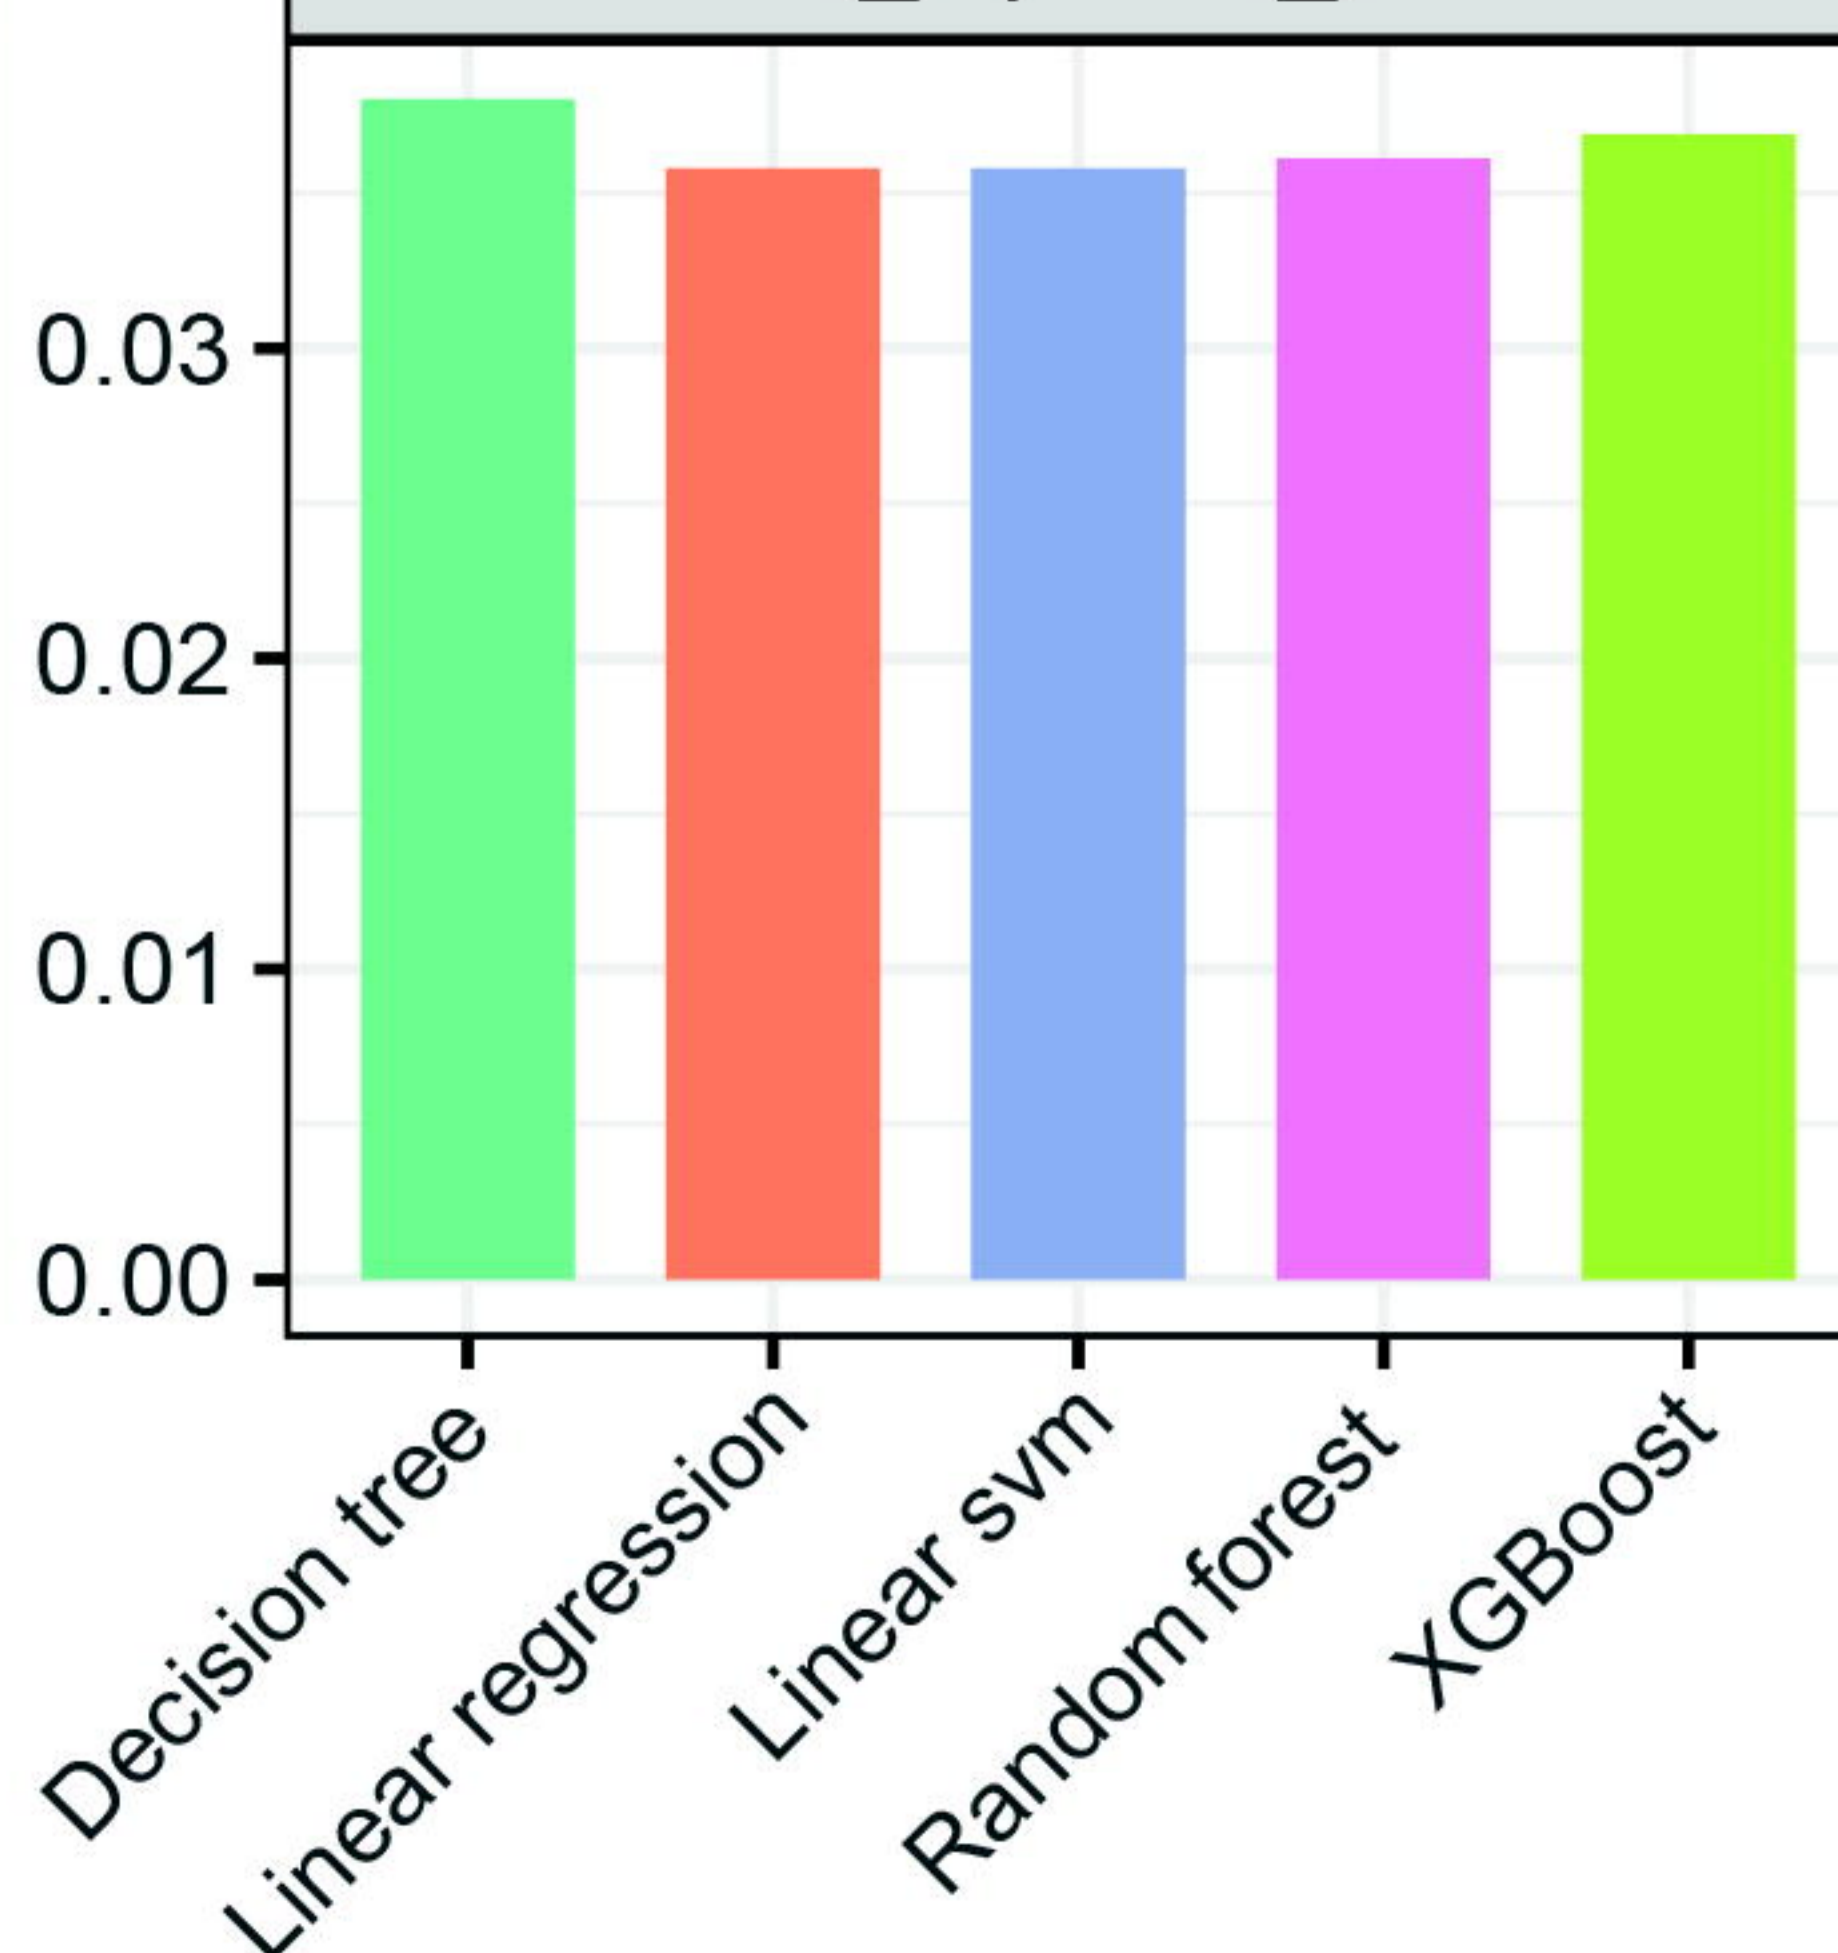



# Supplementary Figure 5

## A

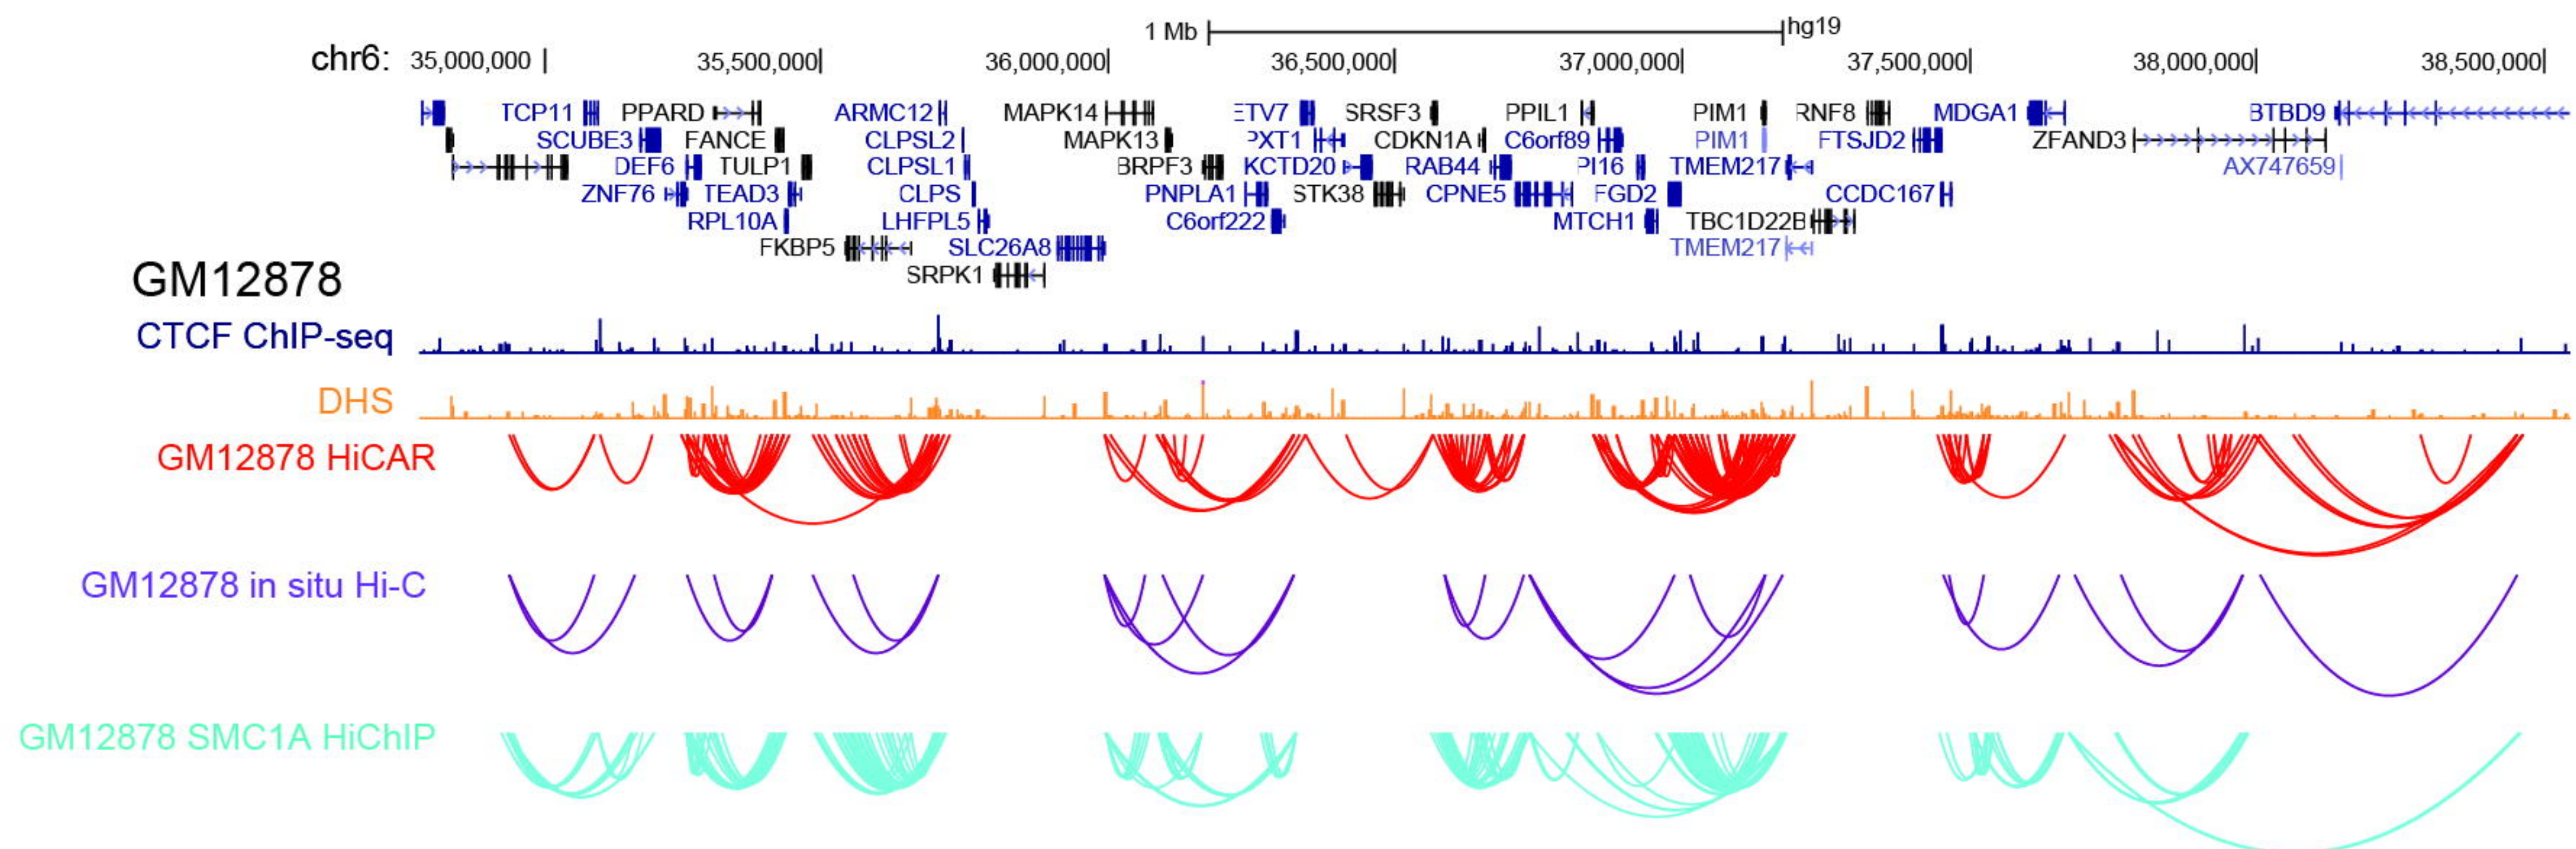

## B

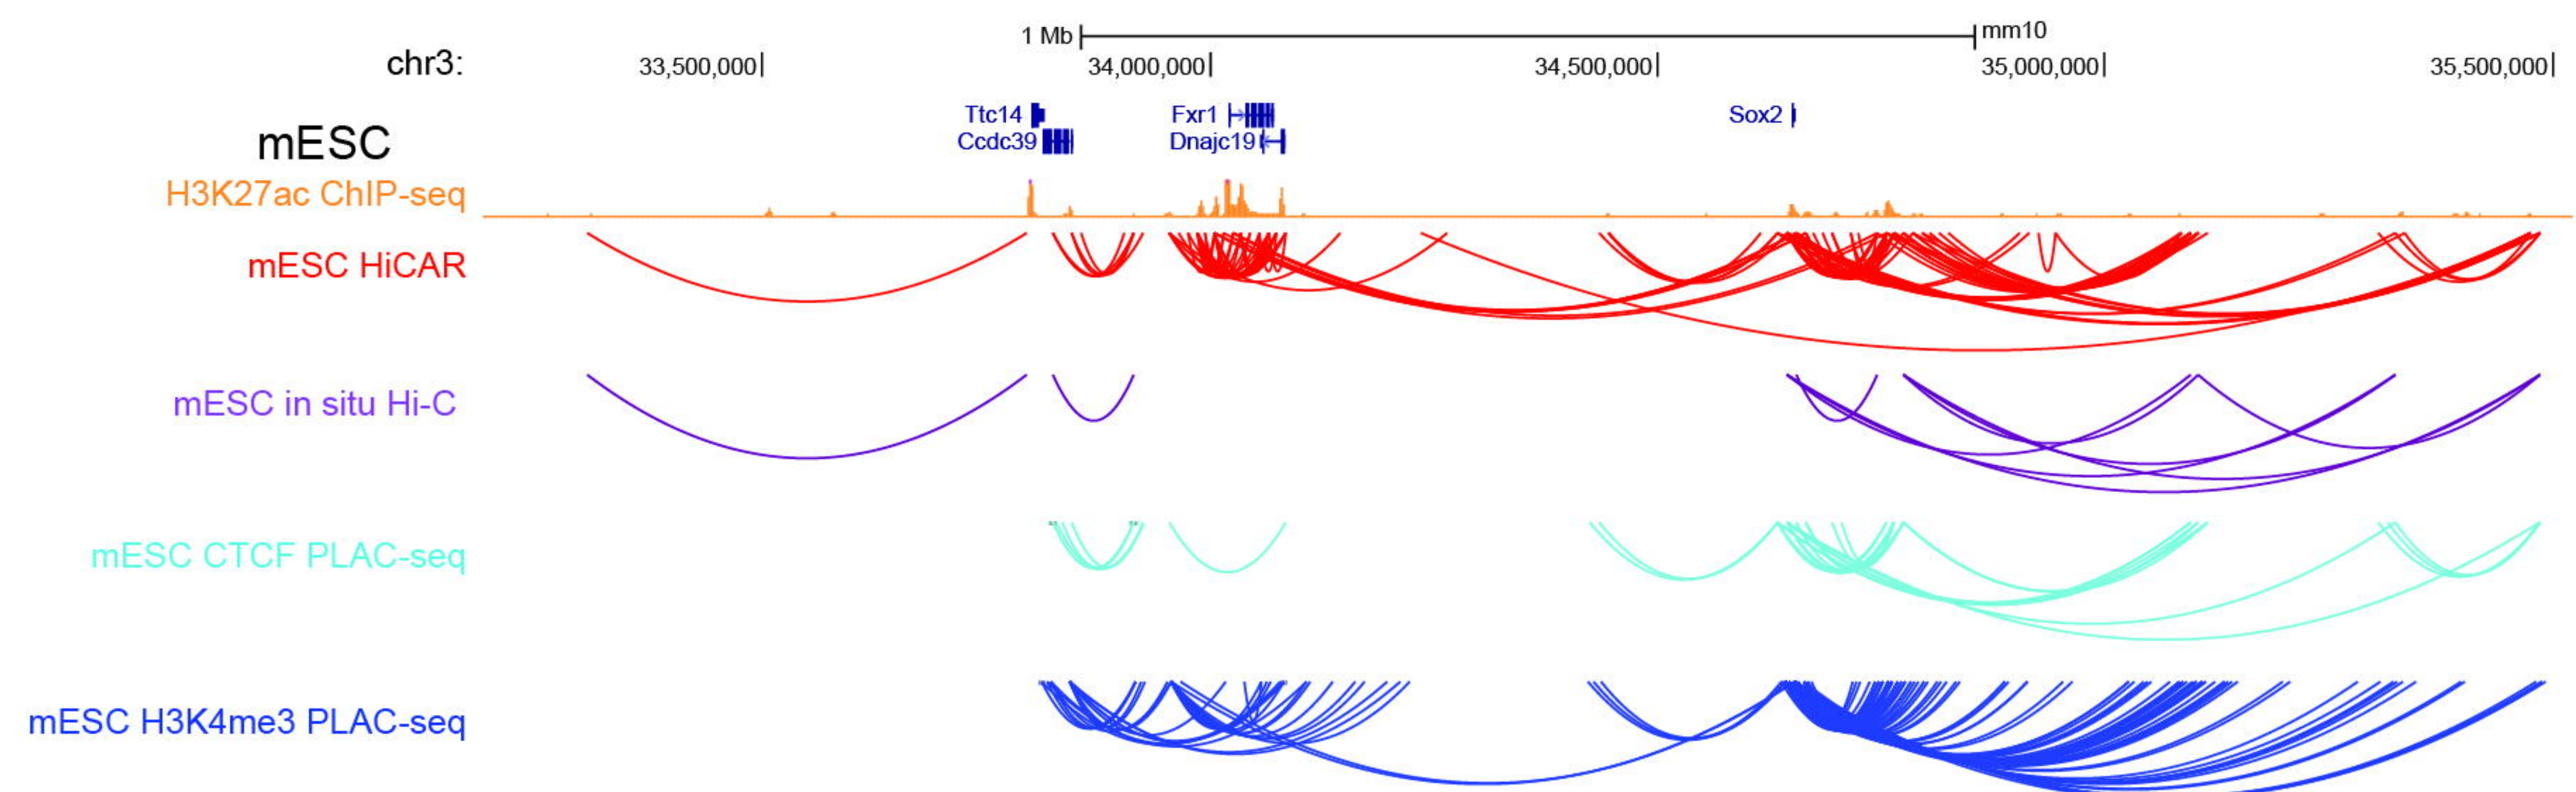

## C

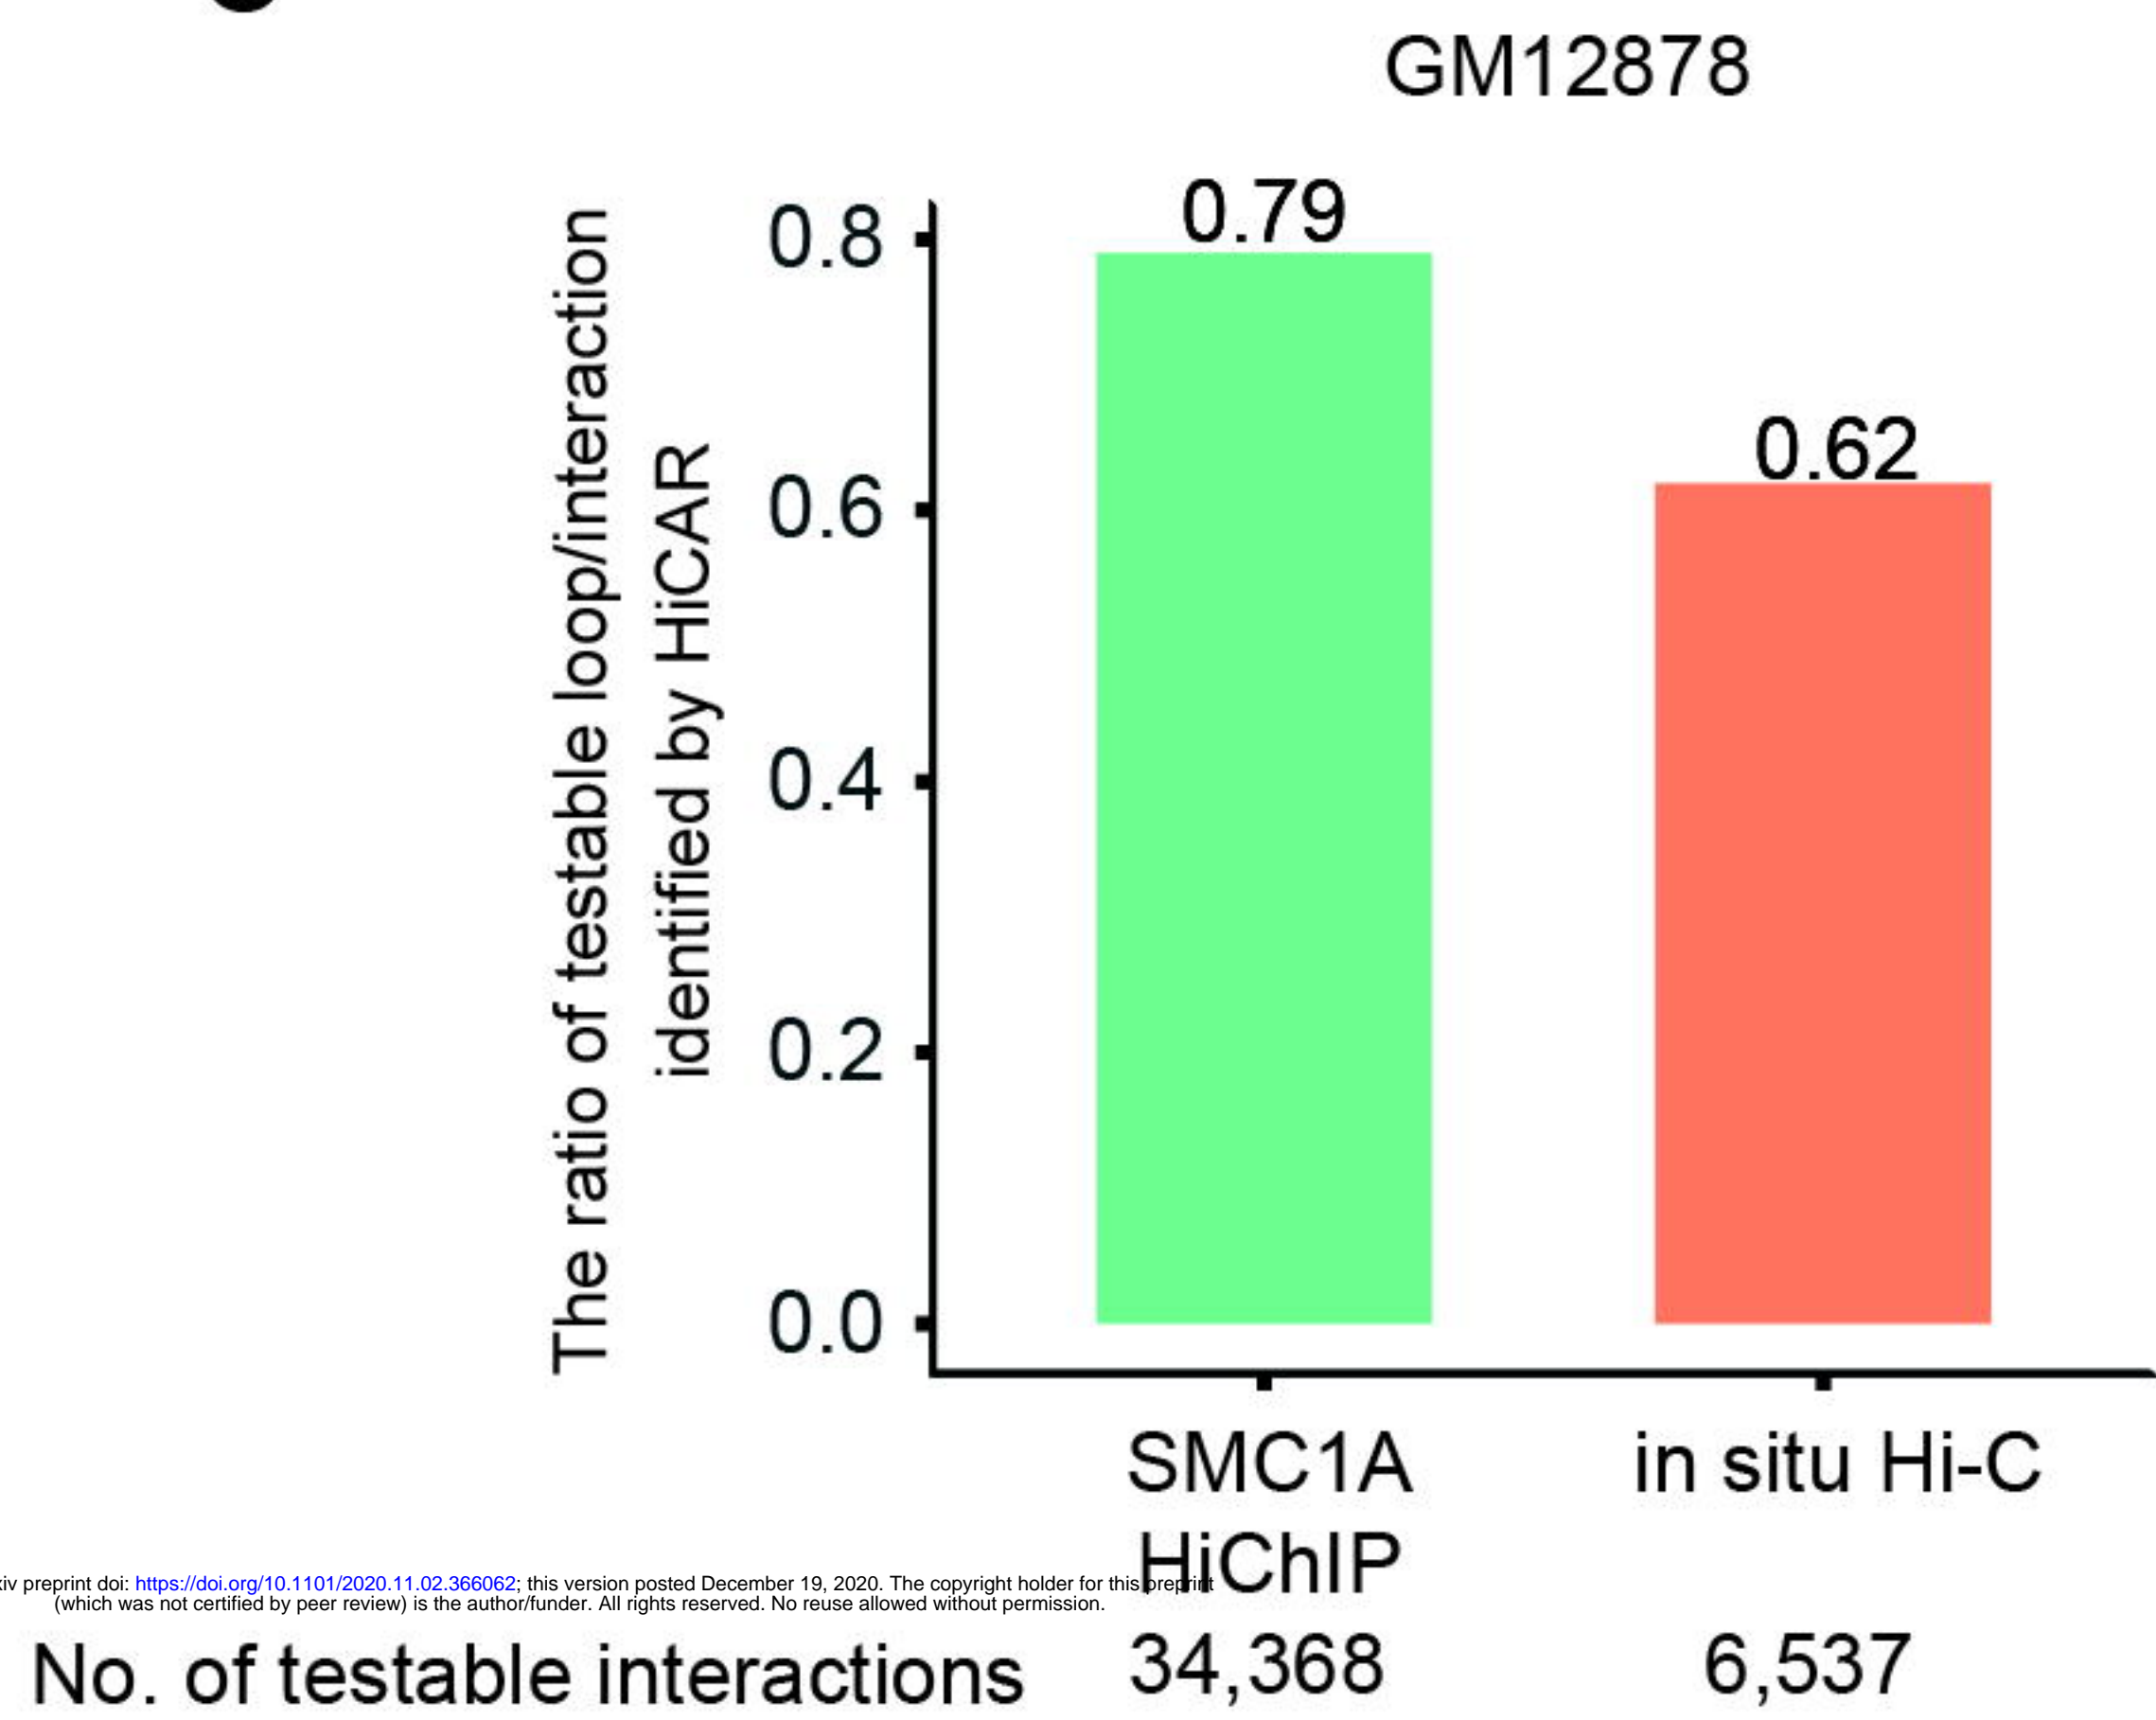

## D

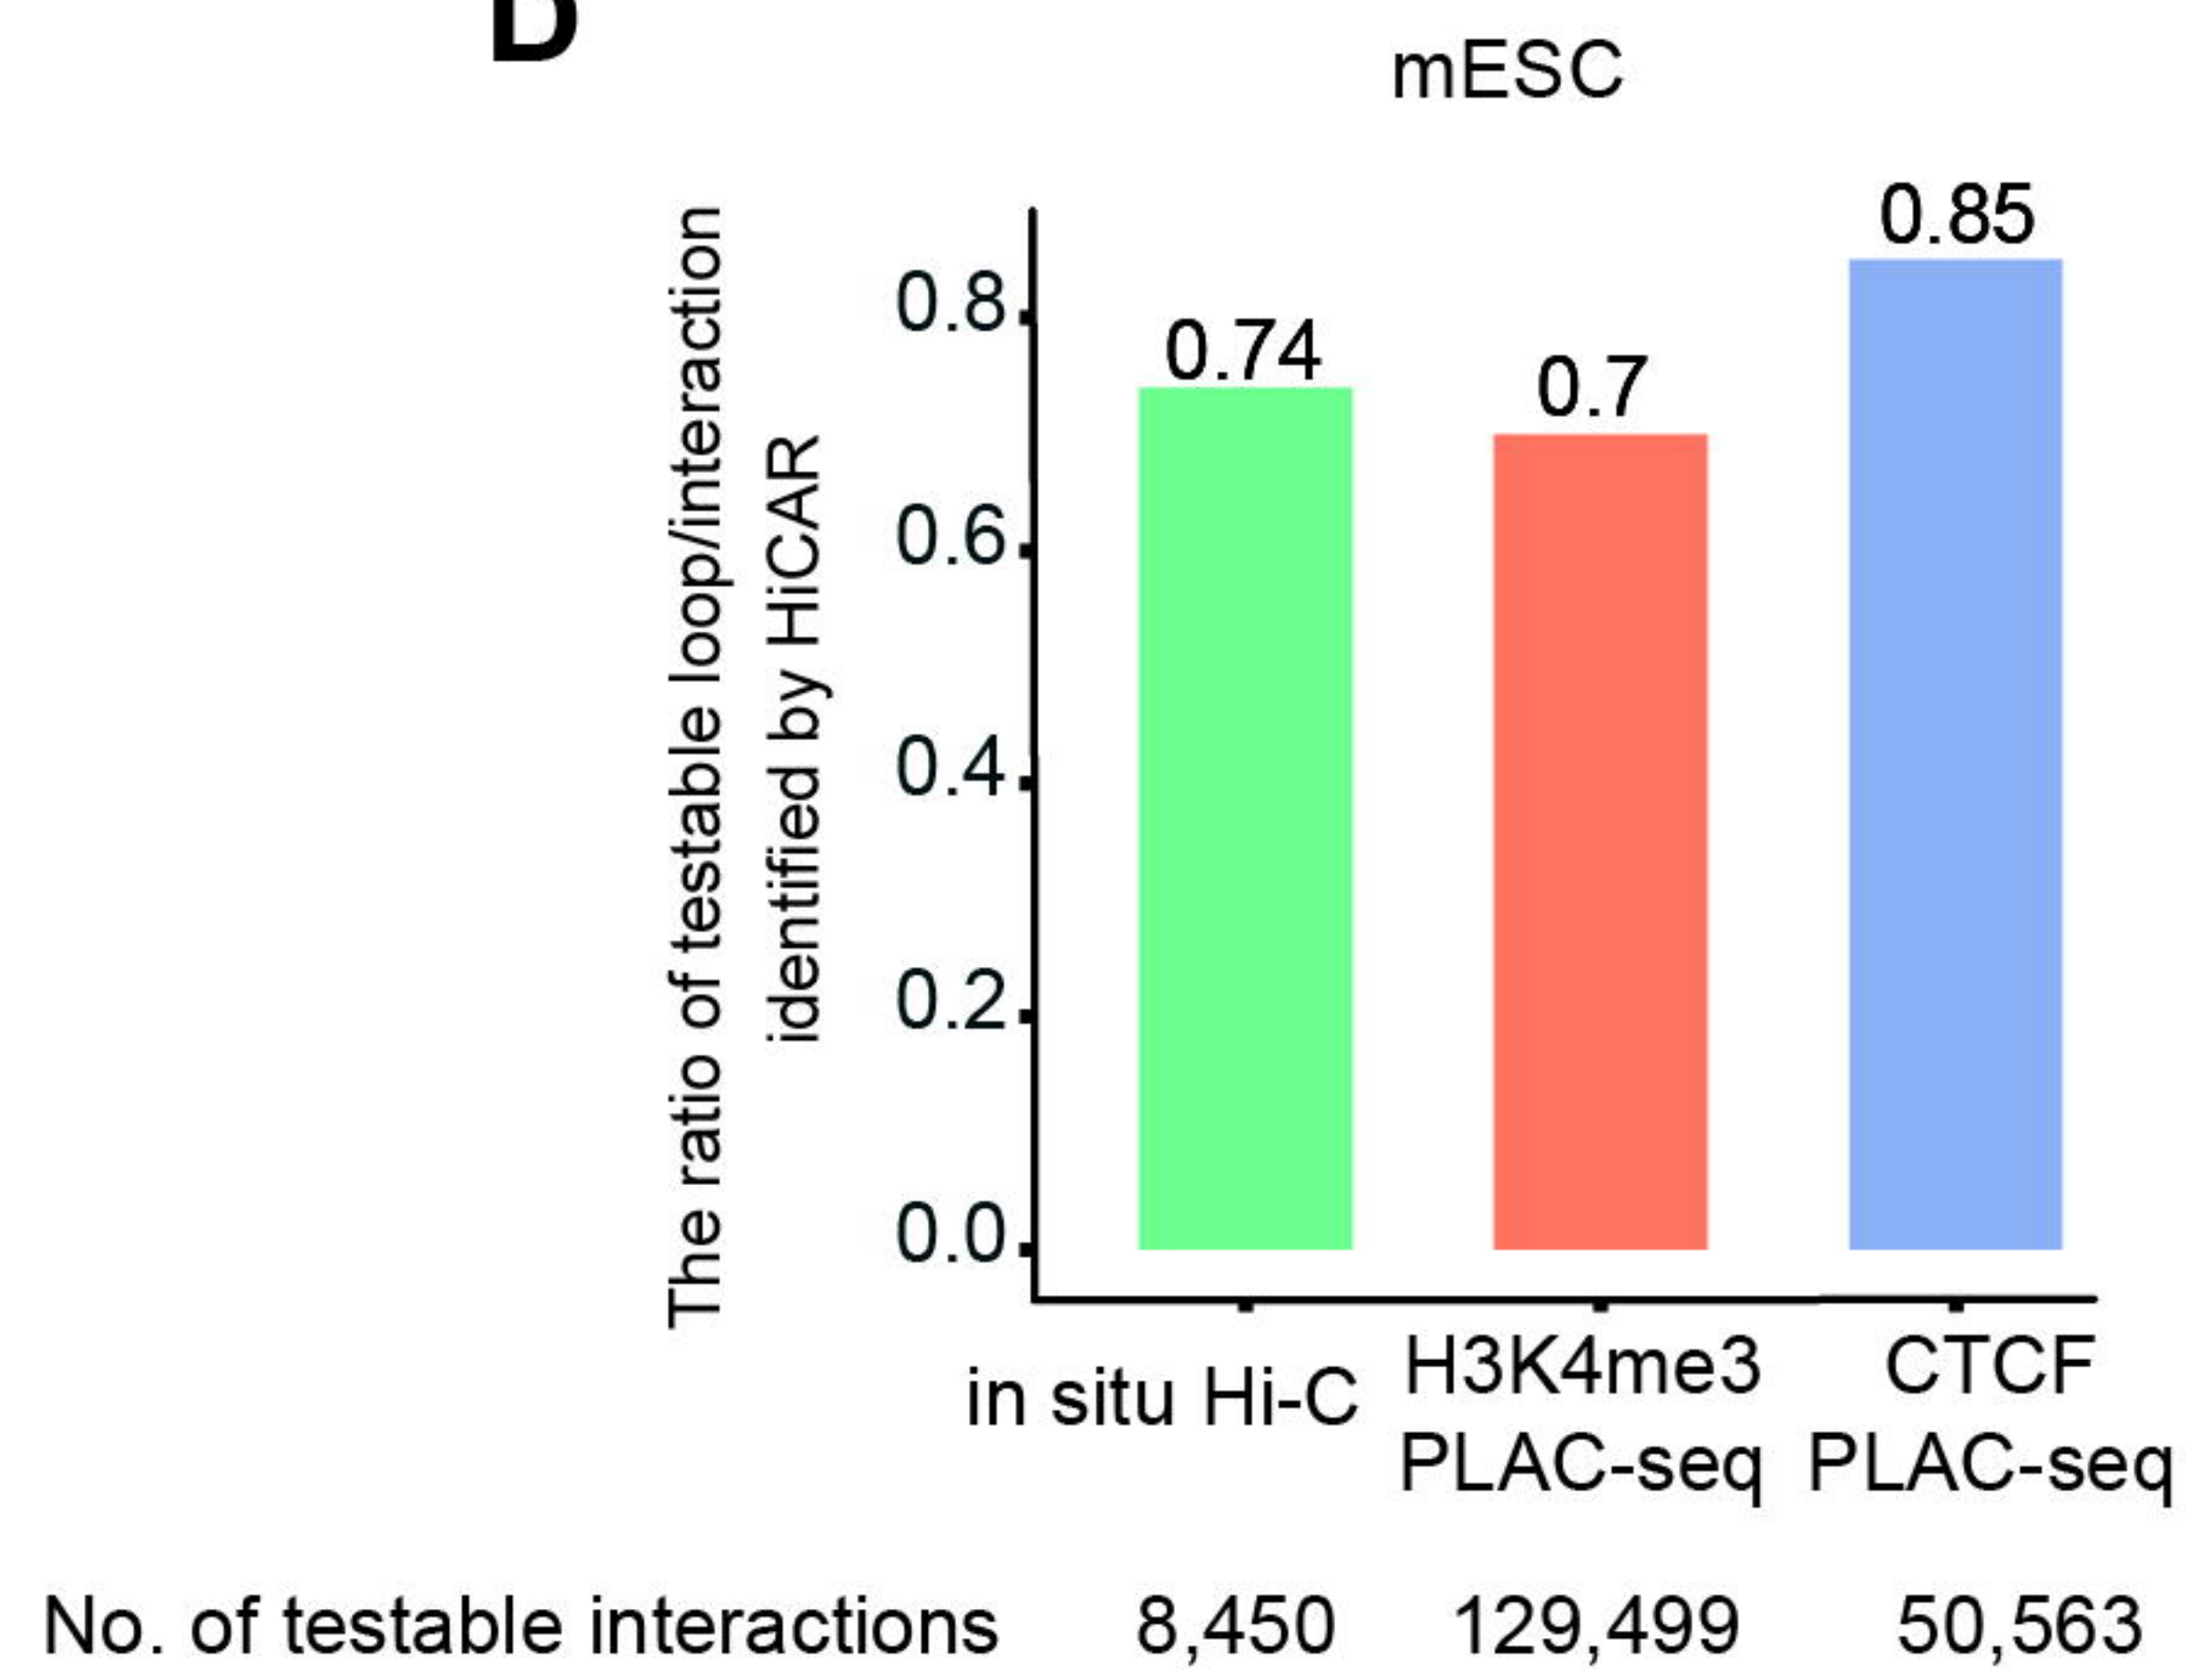

## E

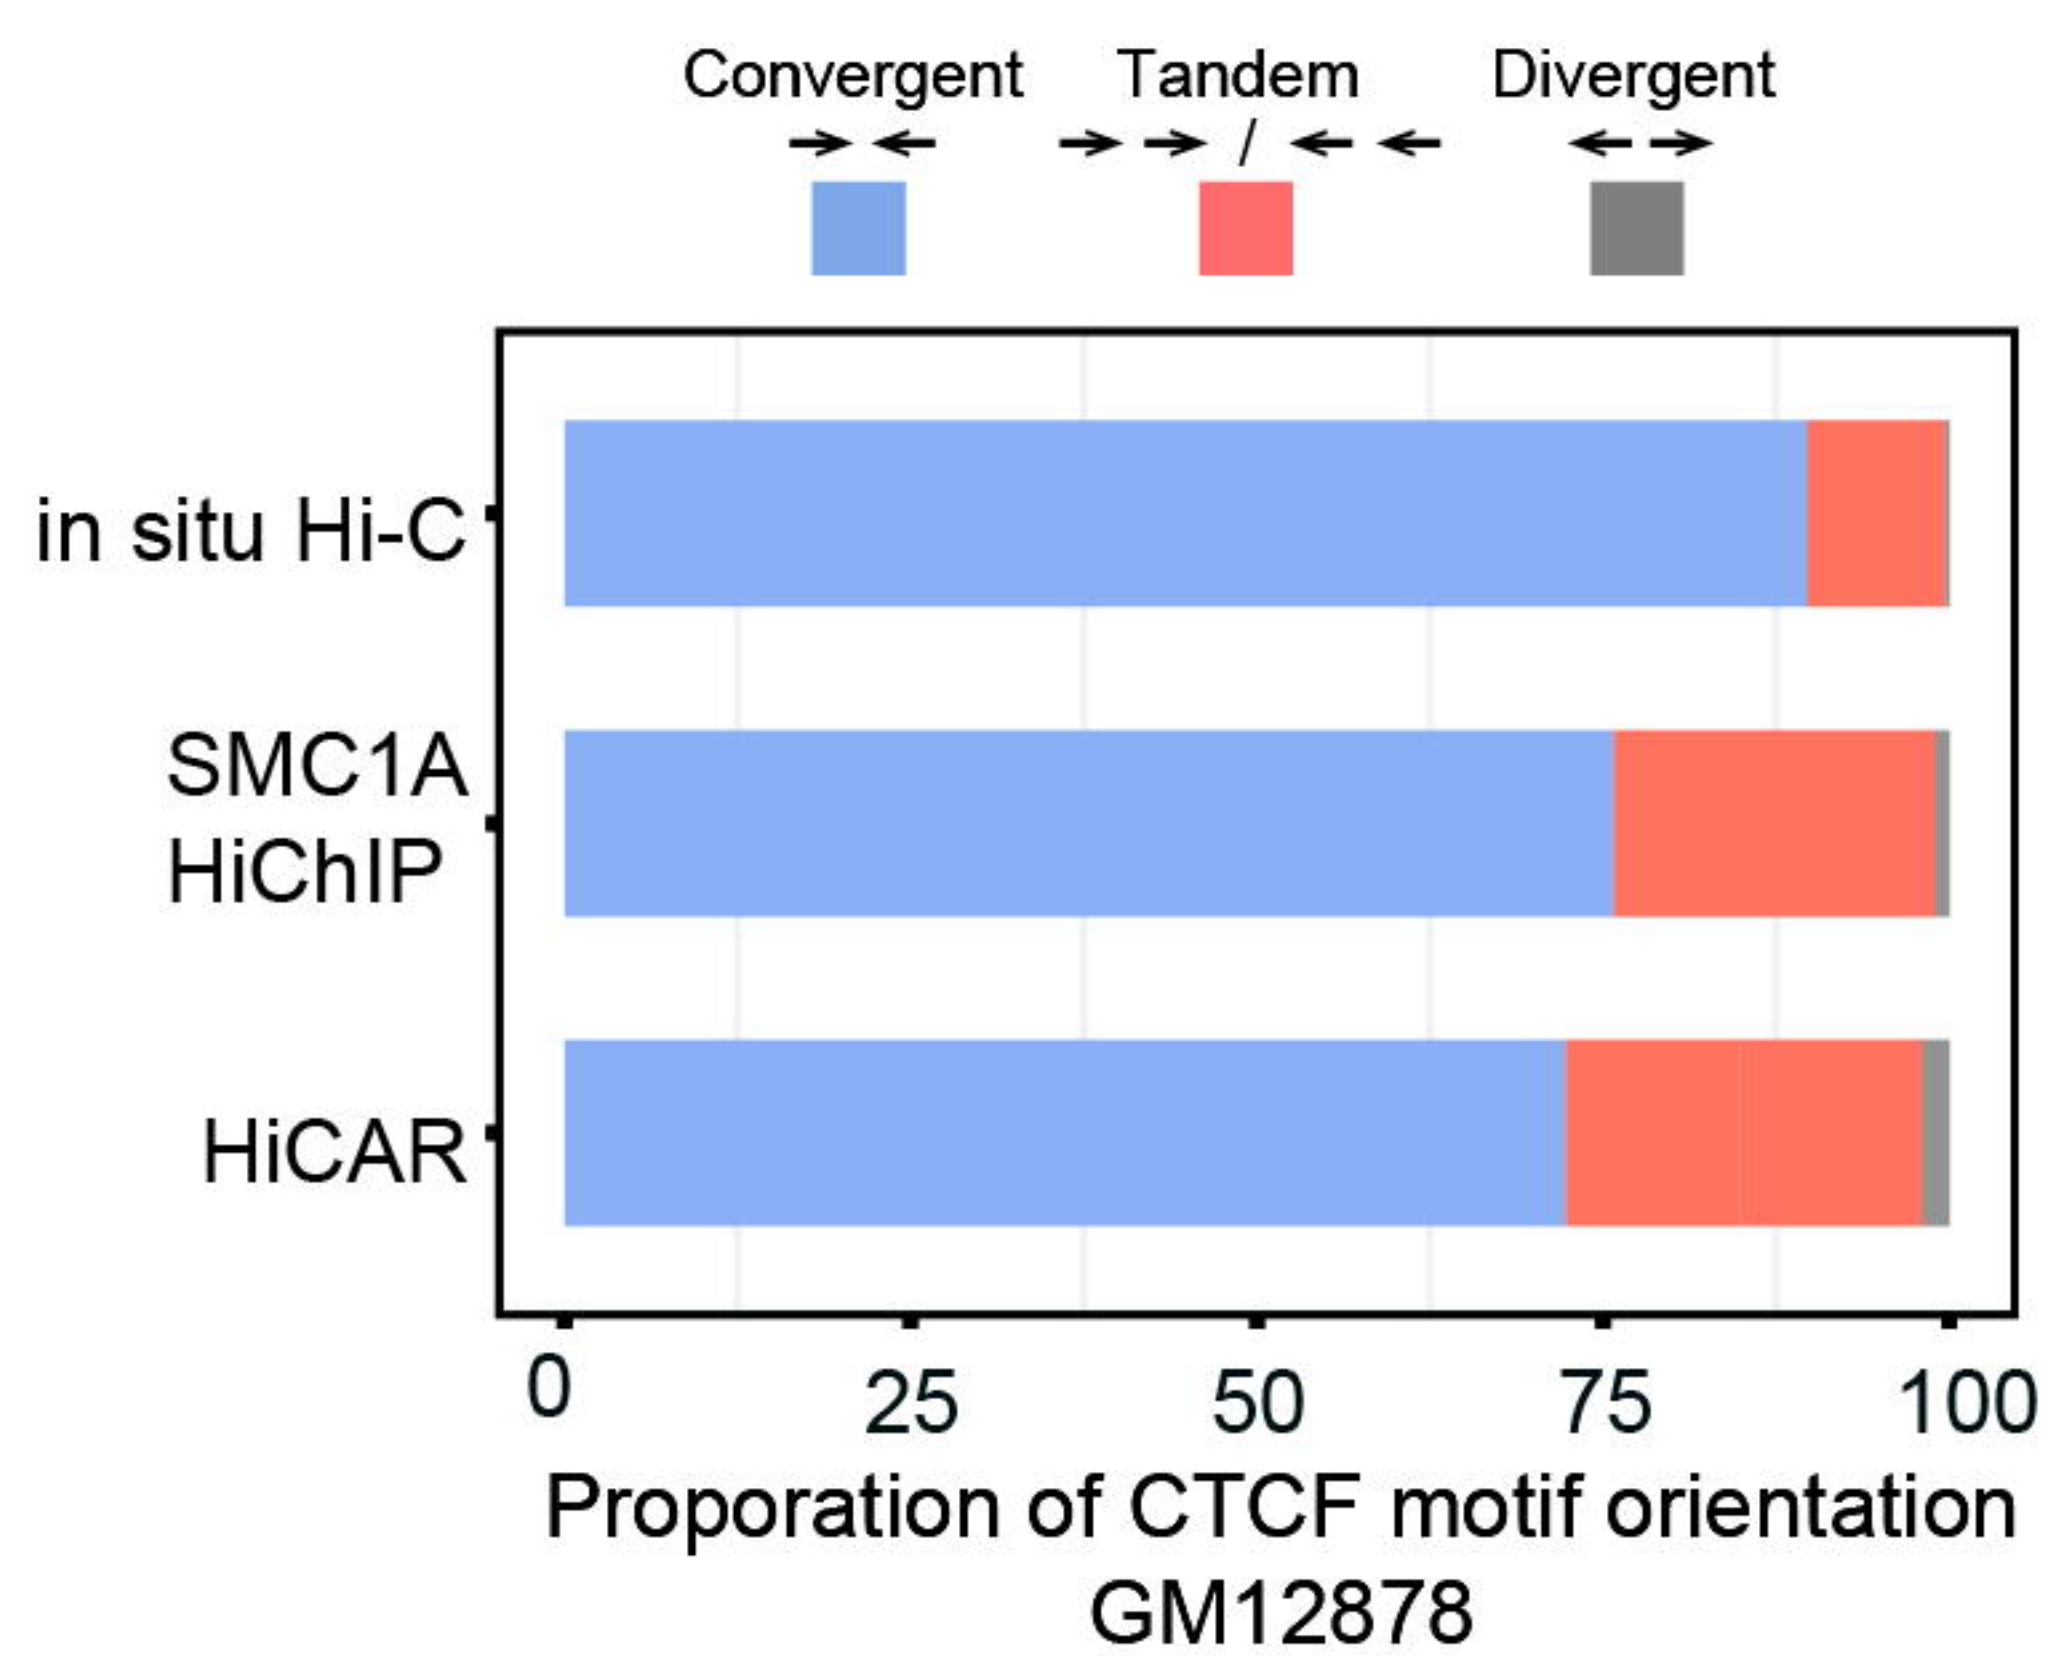

## F

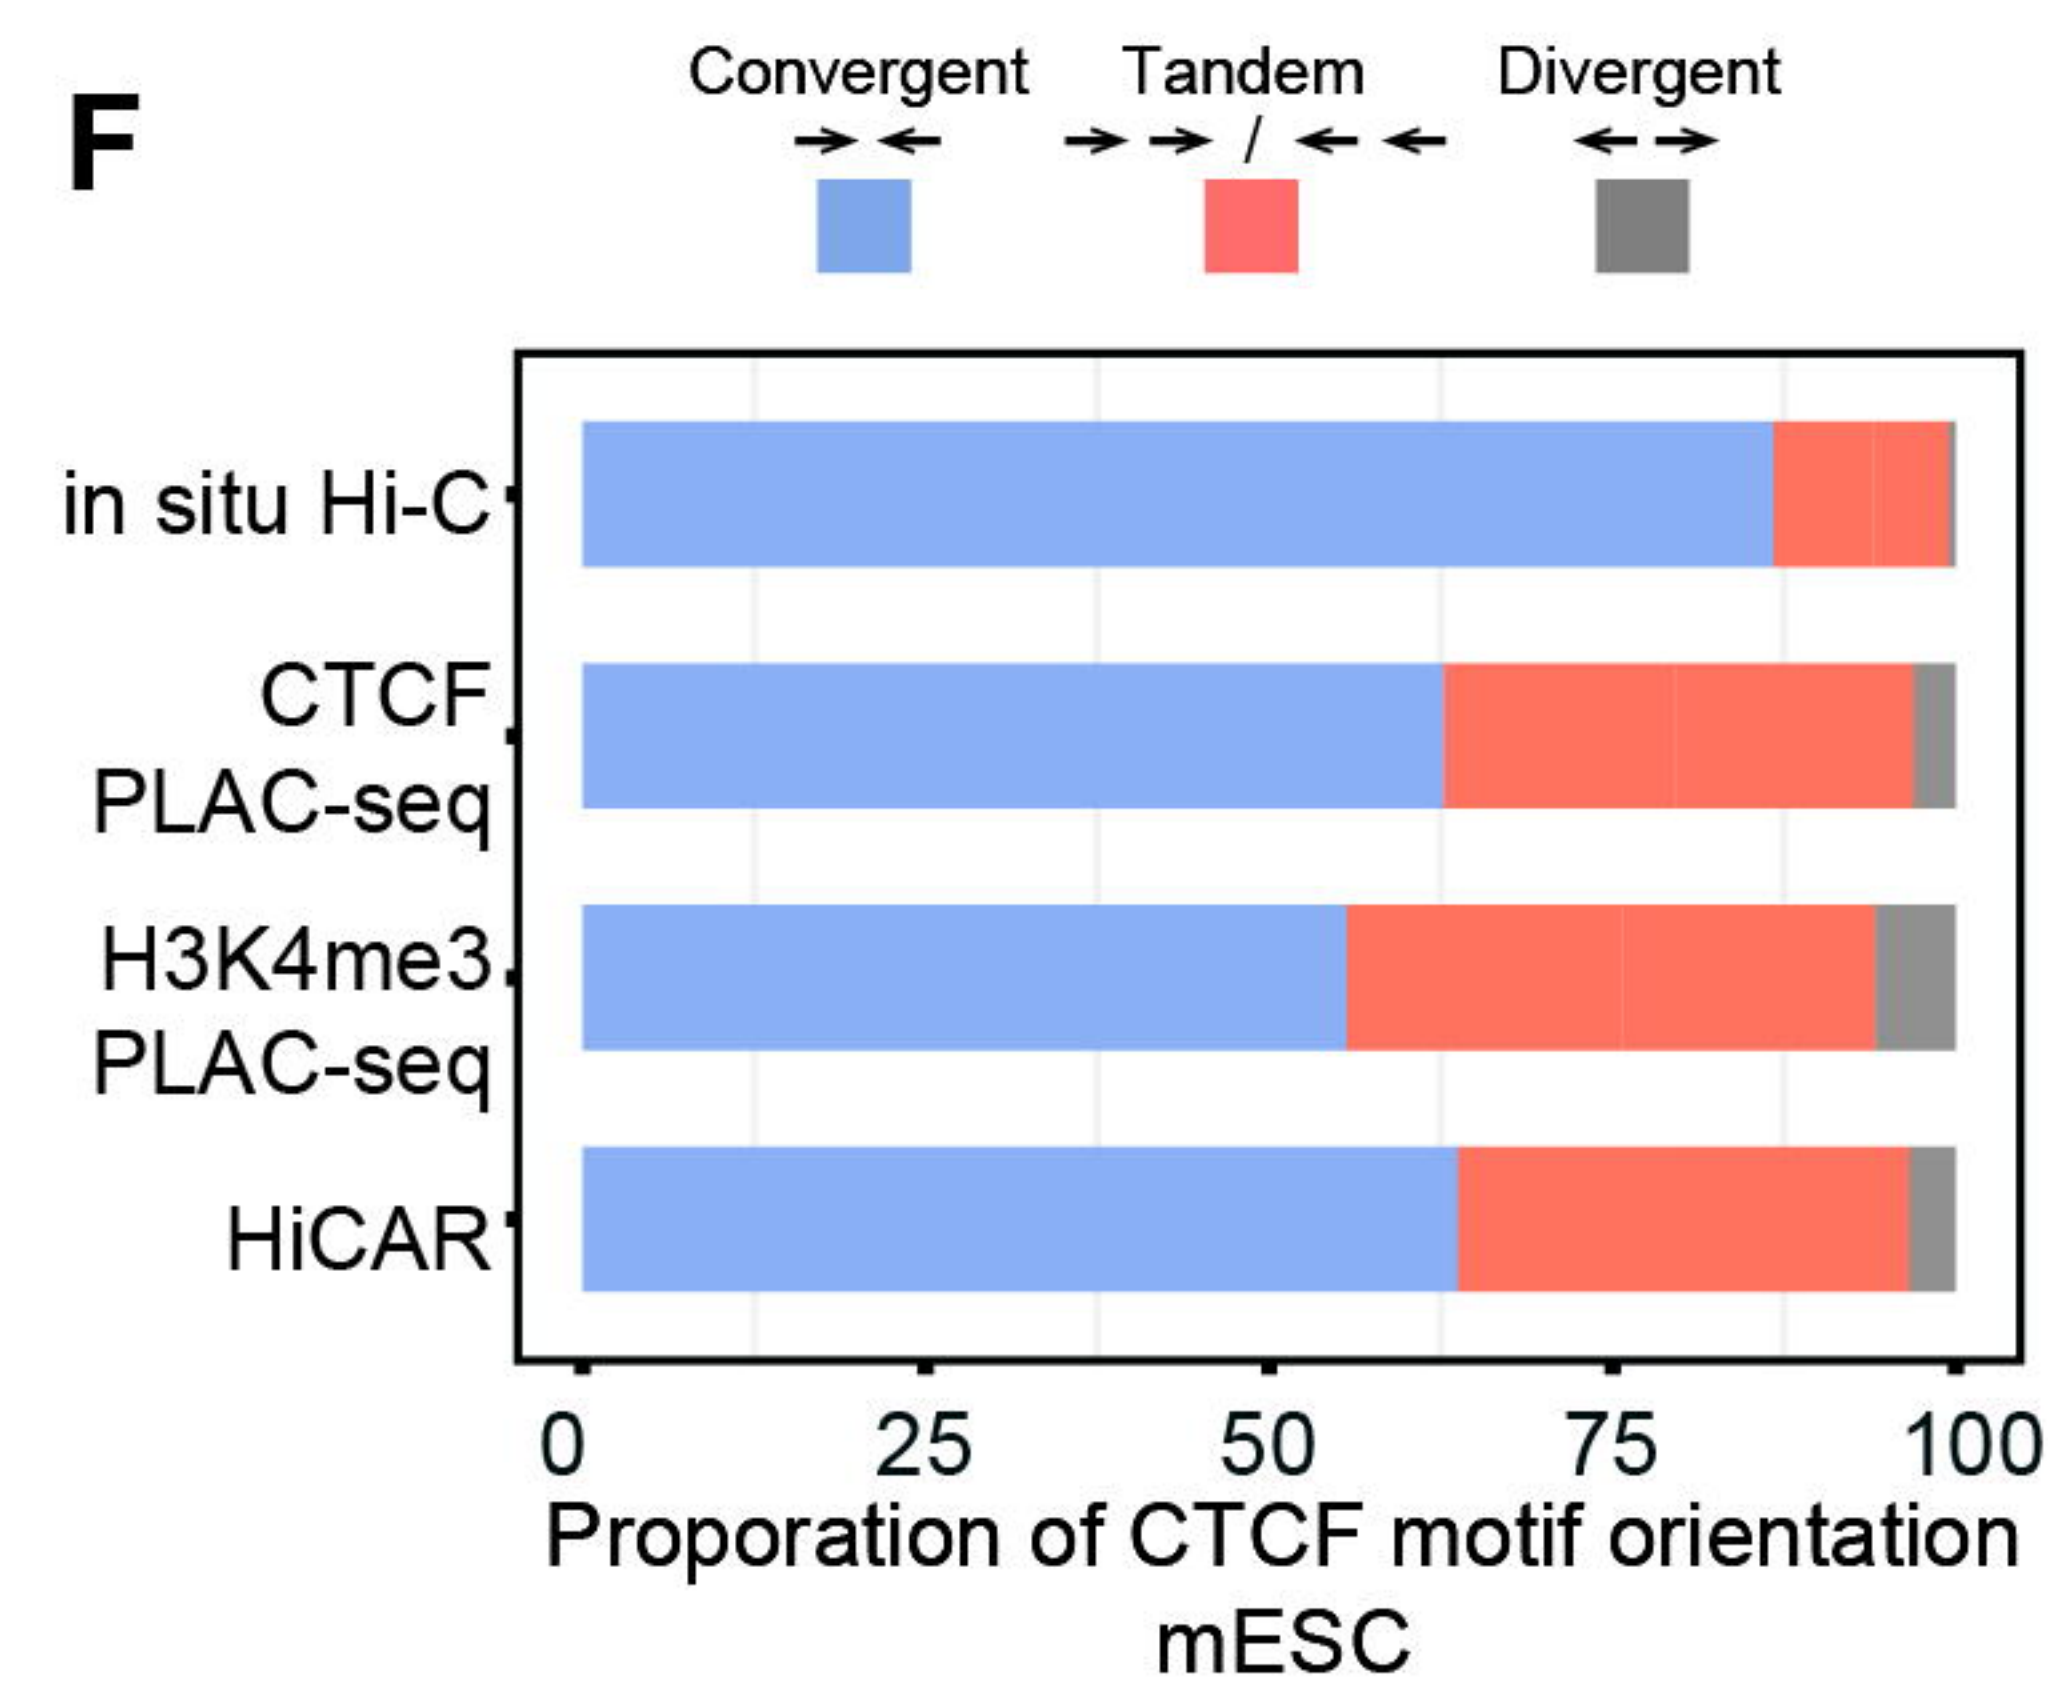

# Figure 1

**A**

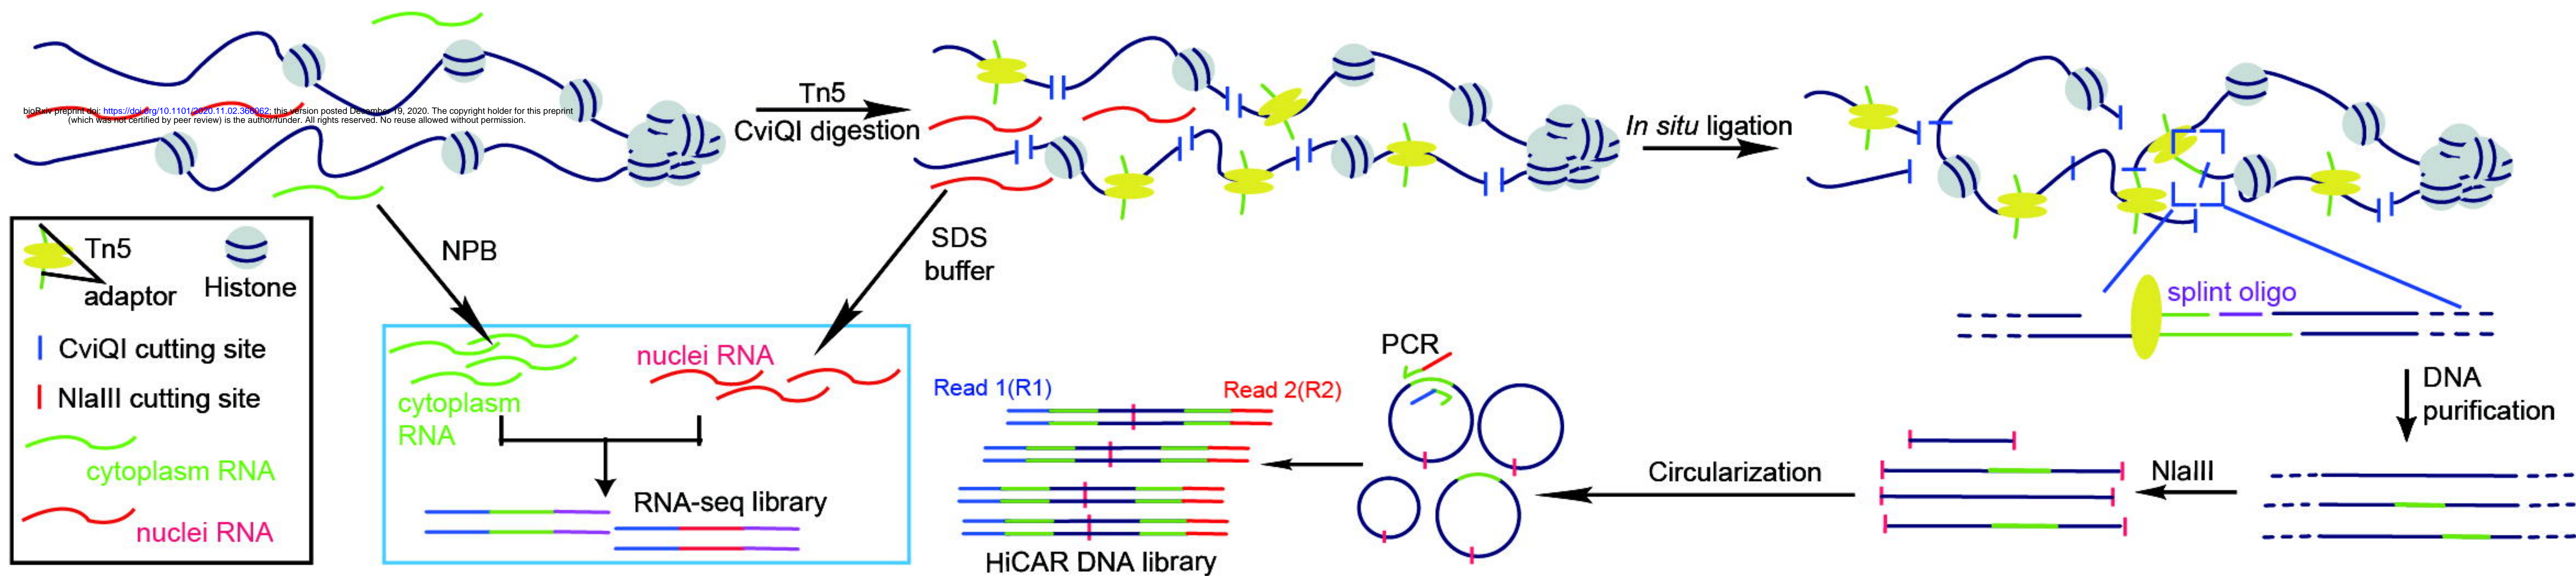

**B**

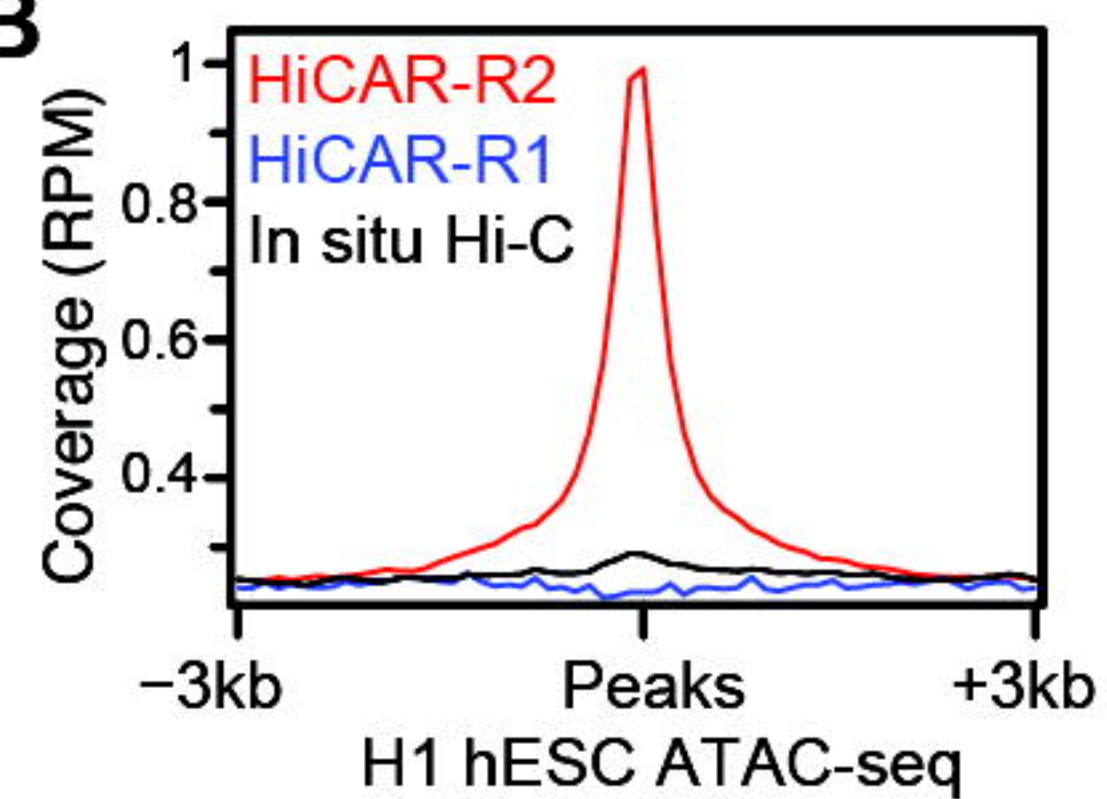

**C**

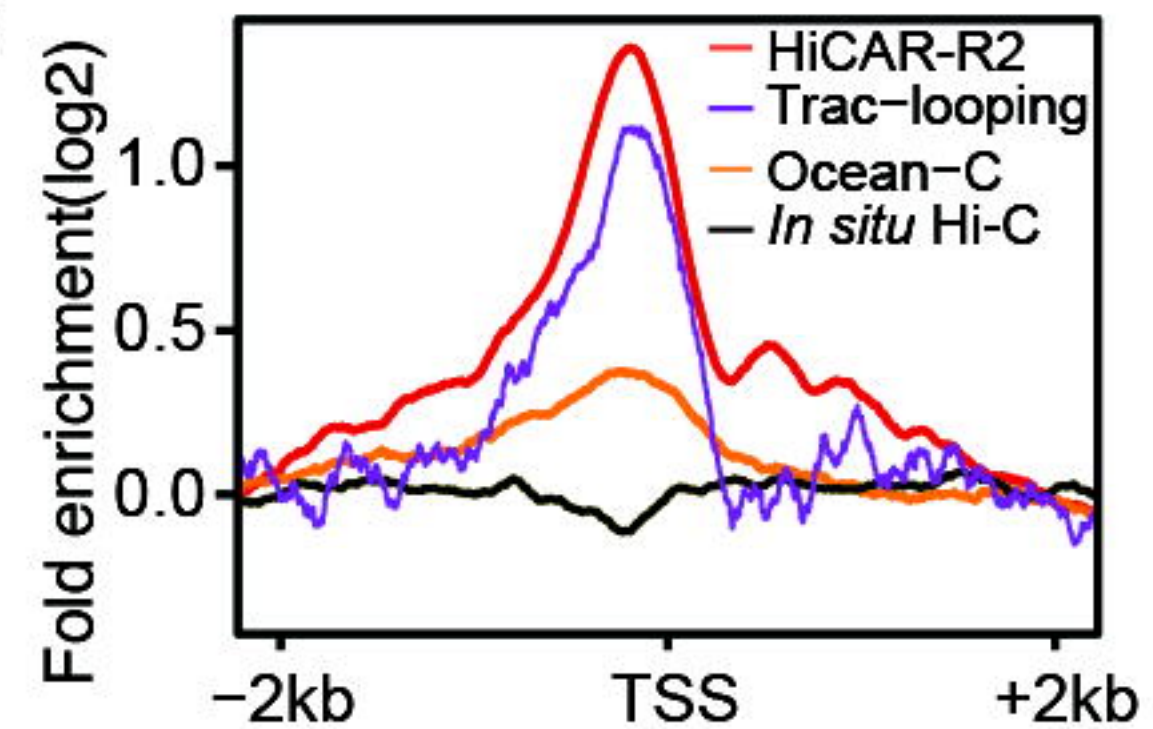

**D**

| Assay        | Input cells | Total reads | Unique PET |
|--------------|-------------|-------------|------------|
| HiCAR        | 100K        | 351M        | 55.6%      |
| In situ Hi-C | 2-5M        | 373M        | 42.2%      |
| Trac-looping | 100M        | 450M        | 13.4%      |

**E**

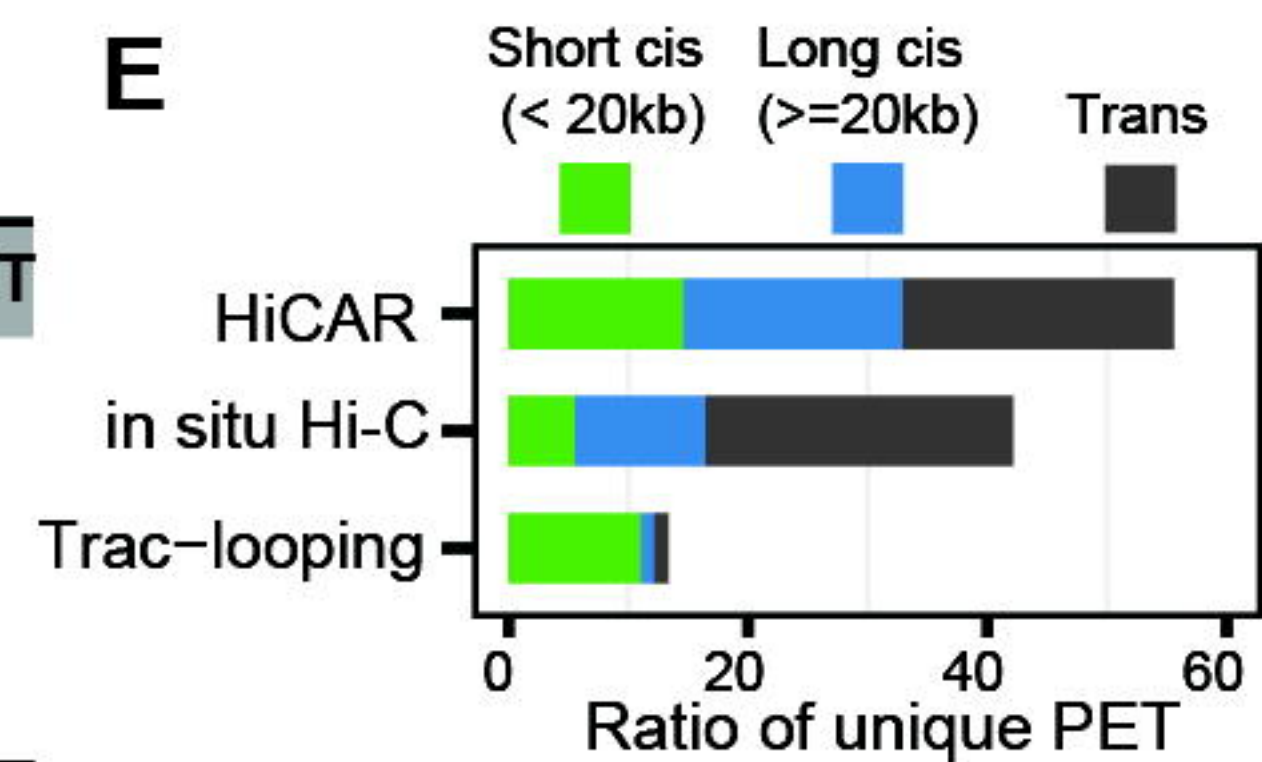

**F**

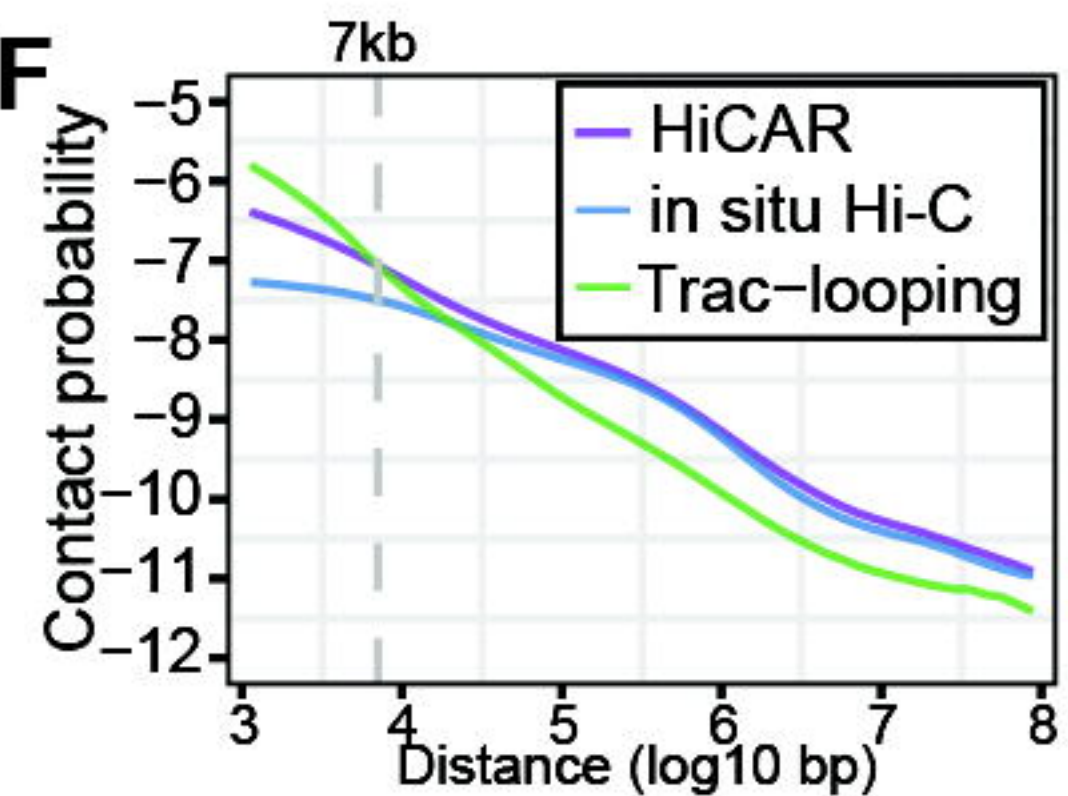

Source: https://www.biorxiv.org/content/10.1101/2020.11.02.366062v2.full.pdf
